# Supplementary material for: Palladium(ii)-catalyzed hydroxy-involved enolate-type efficient C–C functionalization of hydroxynaphthoquinones at room temperature
Source: Royal Society of Chemistry journal article supplement (doi:10.1039/c6ra21652h), 2016-01-01
Supplement: c6ra21652h1.pdf [file c6ra21652h1.pdf]

## Electronic Supporting Information (ESI)

### **Palladium(II)-Catalyzed Hydroxy-involved Enolate-type Efficient C–C Functionalization of Hydroxynaphthoquinones at Room Temperature**

Nan Wang <sup>a</sup>, Xingsen Wu <sup>a</sup>, Taoyu Qin <sup>a</sup>, Jianrui Zhou <sup>a</sup>, Qidong You <sup>a,\*</sup>,  
Xiaojin Zhang <sup>a,b,\*</sup>

<sup>a</sup> State Key Laboratory of Natural Medicines, and Jiangsu Key Laboratory of Drug Design and Optimization, China Pharmaceutical University, Nanjing, 210009, China

<sup>b</sup> Department of Organic Chemistry, School of Science, China Pharmaceutical University, Nanjing, 210009, China

\* Corresponding authors. E-mail: zxj@cpu.edu.cn (X. Zhang), youqd@163.com (Q. You).

### Table of Contents

|          |                                                |            |
|----------|------------------------------------------------|------------|
| <b>1</b> | <b>General Methods .....</b>                   | <b>S2</b>  |
| <b>2</b> | <b>Experimental Procedure .....</b>            | <b>S2</b>  |
| <b>3</b> | <b>Additional Reaction Optimization.....</b>   | <b>S2</b>  |
| <b>4</b> | <b>Large Scale Experiment .....</b>            | <b>S3</b>  |
| <b>5</b> | <b>Control Experiments .....</b>               | <b>S4</b>  |
| <b>6</b> | <b>Analytical Data for All Compounds .....</b> | <b>S4</b>  |
| <b>7</b> | <b>Reference .....</b>                         | <b>S52</b> |

## 1 General Methods

Reactions were monitored by thin-layer chromatography on silica gel plates (650F-254) visualized under UV light. Melting points were determined on a Mel-TEMP II melting point apparatus without correction.  $^1\text{H}$  NMR and  $^{13}\text{C}$  NMR spectra were recorded in  $\text{CDCl}_3$  or DMSO on a Bruker Avance 300 MHz spectrometer at 300 MHz and 75 MHz, respectively. Chemical shifts ( $\delta$ ) are reported in parts per million (ppm) from tetramethylsilane (TMS) using the residual solvent resonance ( $\text{CDCl}_3$ : 7.26 ppm, 1.56 ppm (HDO) for  $^1\text{H}$  NMR, 77.16 ppm for  $^{13}\text{C}$  NMR; DMSO: 3.30 ppm and 2.50 ppm for  $^1\text{H}$  NMR; THF: 25.31 ppm, 67.21 ppm for  $^{13}\text{C}$  NMR). Multiplicities are abbreviated as follows: s = singlet, d = doublet, dd = doublet of doublet, ddd = doublet of double doublets, dt = doublet of triplet, dtd = doublet of triple doublets t = triplet, q = quartet, m = multiplet). MS spectra were recorded on a LC/MSD TOF HR-MS Spectrum. Flash column chromatography was performed with 100-200 mesh silica gel and yields refer to chromatographically and spectroscopically pure compounds.

All chemicals purchased from commercial suppliers were used as received unless otherwise stated.  $\text{Pd}(\text{OAc})_2$  was purchased from Aladdin. **1t-1w**<sup>[1]</sup>, **2c**<sup>[2]</sup>, **2g**<sup>[3]</sup>, **2k**<sup>[2]</sup> and **4**<sup>[3]</sup> were prepared according to the literature procedures. All solvents were reagent grade and, when necessary, were purified and dried by standard methods.

## 2 Experimental Procedure

### General experimental procedure for synthesis of 3a-3y

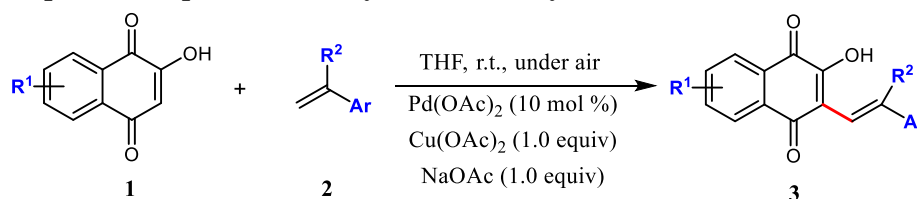

A mixture of (substituted) 2-hydroxy-1,4-naphthoquinone (**1**, 0.30 mmol, 1.0 equiv), (substituted) terminal alkenes (**2**, 0.45 mmol, 1.5 equiv),  $\text{Cu}(\text{OAc})_2$  (0.30 mmol, 54 mg, 1.0 equiv),  $\text{NaOAc}$  (0.30 mmol, 41 mg, 1.0 equiv),  $\text{Pd}(\text{OAc})_2$  (10 mol %) and THF (solvent, 10 mL) was stirred for 4 h at 25 °C (**3r** and **3s** was conducted at 50 °C) under air condition. Upon completion of the reaction, as determined by TLC, the mixture was filtered through a celite pad, and then washed with cooled water (20 mL), extracted with dichloromethane ( $3 \times 20$  mL) and dried over anhydrous  $\text{Na}_2\text{SO}_4$  and concentrated. The residue was purified by column chromatography on silica gel using dichloromethane as the eluent to afford corresponding product.

## 3 Additional Reaction Optimization

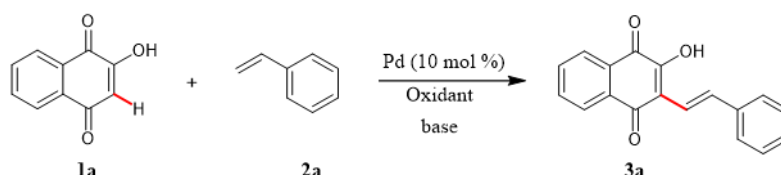

Table S1 Optimization of oxidant amount<sup>[a]</sup>

| Entry | <b>2a</b><br>equiv | Oxidant<br>equiv | Oxidant | Catalyst | Solvent | Yield<br>[%] <sup>[b]</sup> |
|-------|--------------------|------------------|---------|----------|---------|-----------------------------|
|-------|--------------------|------------------|---------|----------|---------|-----------------------------|

|   |     |     |                      |                      |     |    |
|---|-----|-----|----------------------|----------------------|-----|----|
| 1 | 1.5 | 1   | Cu(OAc) <sub>2</sub> | Pd(OAc) <sub>2</sub> | THF | 84 |
| 2 | 1.5 | 1.5 | Cu(OAc) <sub>2</sub> | Pd(OAc) <sub>2</sub> | THF | 85 |
| 3 | 1.5 | 2   | Cu(OAc) <sub>2</sub> | Pd(OAc) <sub>2</sub> | THF | 85 |

<sup>[a]</sup> Reaction condition: **1a** (0.30 mmol), Oxidant (1.0 equiv), Base (NaOAc, 1.0 equiv) and Pd catalyst (10 mol %) in solvent (10 ml) for 4 h under air.

<sup>[b]</sup> Isolated yield.

Table S2 Optimization of the base<sup>[a]</sup>

| Entry | <b>2a</b><br>equiv | Base<br>equiv | Base                           | Oxidant              | Catalyst             | Solvent | Yield<br>[%] <sup>[b]</sup> |
|-------|--------------------|---------------|--------------------------------|----------------------|----------------------|---------|-----------------------------|
| 1     | 1.5                | 2             | K <sub>2</sub> CO <sub>3</sub> | Cu(OAc) <sub>2</sub> | Pd(OAc) <sub>2</sub> | THF     | 32                          |
| 2     | 1.5                | 2             | Et <sub>3</sub> N              | Cu(OAc) <sub>2</sub> | Pd(OAc) <sub>2</sub> | THF     | Trace                       |
| 3     | 1.5                | 2             | NaOAc                          | Cu(OAc) <sub>2</sub> | Pd(OAc) <sub>2</sub> | THF     | 85                          |
| 4     | 1.5                | 2             | K <sub>3</sub> PO <sub>4</sub> | Cu(OAc) <sub>2</sub> | Pd(OAc) <sub>2</sub> | THF     | Trace                       |
| 5     | 1.5                | 1             | NaOAc                          | Cu(OAc) <sub>2</sub> | Pd(OAc) <sub>2</sub> | THF     | 84                          |
| 6     | 1.5                | 1.5           | NaOAc                          | Cu(OAc) <sub>2</sub> | Pd(OAc) <sub>2</sub> | THF     | 84                          |
| 7     | 1.5                | 2             | NaOAc                          | Cu(OAc) <sub>2</sub> | Pd(OAc) <sub>2</sub> | THF     | 85                          |

<sup>[a]</sup> Reaction condition: **1a** (0.30 mmol), Oxidant (1.0 equiv), Base (NaOAc, 1.0 equiv) and Pd catalyst (10 mol %) in solvent (10 ml) for 4 h under air.

<sup>[b]</sup> Isolated yield.

Table S3 Optimization of catalyst amount<sup>[a]</sup>

| Entry | <b>2a</b><br>equiv | Oxidant              | Catalyst equiv<br>[mol %] | Catalyst             | Solvent | Yield<br>[%] <sup>[b]</sup> |
|-------|--------------------|----------------------|---------------------------|----------------------|---------|-----------------------------|
| 1     | 1.5                | Cu(OAc) <sub>2</sub> | 5                         | Pd(OAc) <sub>2</sub> | THF     | 43                          |
| 2     | 1.5                | Cu(OAc) <sub>2</sub> | 10                        | Pd(OAc) <sub>2</sub> | THF     | 84                          |
| 3     | 1.5                | Cu(OAc) <sub>2</sub> | 15                        | Pd(OAc) <sub>2</sub> | THF     | 84                          |
| 4     | 1.5                | Cu(OAc) <sub>2</sub> | 20                        | Pd(OAc) <sub>2</sub> | THF     | 86                          |

<sup>[a]</sup> Reaction condition: **1a** (0.30 mmol), Oxidant (1.0 equiv), Base (NaOAc, 1.0 equiv) and Pd catalyst (10 mol %) in solvent (10 ml) for 4 h under air.

<sup>[b]</sup> Isolated yield.

Table S4 Negative control<sup>[a]</sup>

| Entry | <b>2a</b><br>equiv | Oxidant              | Catalyst             | Solvent | Yield<br>[%] <sup>[b]</sup> |
|-------|--------------------|----------------------|----------------------|---------|-----------------------------|
| 1     | 1.5                | Cu(OAc) <sub>2</sub> | -                    | THF     | 15                          |
| 2     | 1.5                | -                    | Pd(OAc) <sub>2</sub> | THF     | NR <sup>[c]</sup>           |
| 3     | 1.5                | -                    | -                    | THF     | NR <sup>[c]</sup>           |

<sup>[a]</sup> Reaction condition: **1a** (0.30 mmol), Oxidant (1.0 equiv), Base (NaOAc, 1.0 equiv) and Pd catalyst (10 mol %) in solvent (10 ml) for 4 h under air.

<sup>[b]</sup> Isolated yield.

<sup>[c]</sup> NR = No reaction.

## 4 Large Scale Experiment

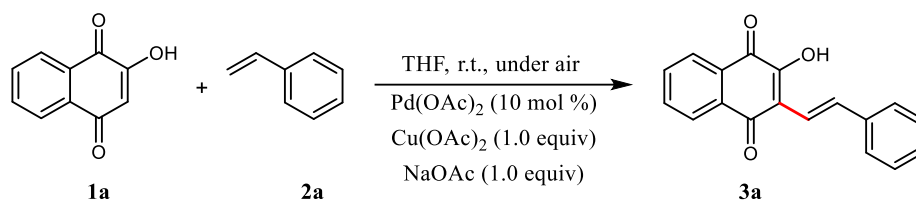

A 250 mL round-bottomed flask with a magnetic stir bar was charged with **1a** (2.61 g, 15 mmol), Pd(OAc)<sub>2</sub> (336 mg, 10.0 mol %), Cu(OAc)<sub>2</sub> (2.71 g, 15 mmol, 1.0 equiv), NaOAc (1.23 g, 15 mmol, 1.0 equiv), **2a** (2.34 g/2.57 mL, 22.5 mmol, 1.5 equiv), and THF (50 mL) was stirred for 6 h at 25 °C under air condition. Upon completion of the reaction, as determined by TLC, the mixture was filtered through a celite pad, and then washed with cooled water (50 mL), extracted with dichloromethane (3 × 30 mL) and dried over anhydrous Na<sub>2</sub>SO<sub>4</sub> and concentrated. The residue was purified by column chromatography on silica gel using dichloromethane as the eluent to afford corresponding product.

## 5 Control Experiments

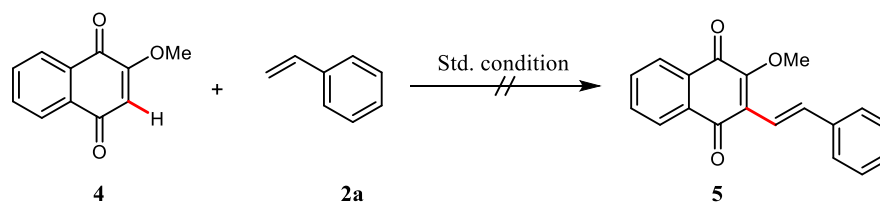

A mixture of 2-methoxynaphthalene-1,4-dione (**4**, 56.4 mg, 0.30 mmol, 1.0 equiv), terminal alkenes (**2a**, 0.45 mmol, 47mg/0.51 mL, 1.5 equiv), Cu(OAc)<sub>2</sub> (0.30 mmol, 54 mg, 1.0 equiv), NaOAc (0.30 mmol, 41 mg, 1.0 equiv), Pd(OAc)<sub>2</sub> (10 mol %) and THF (solvent, 10 mL) was stirred for 4 h at 25 °C under air condition and determined by TLC. No reaction was observed.

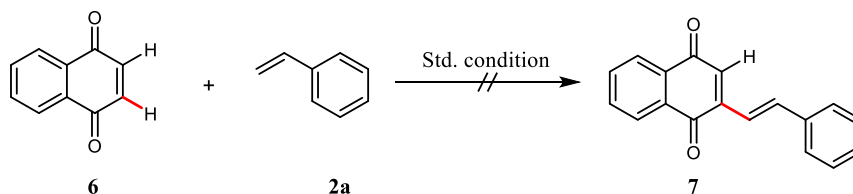

A mixture of naphthalene-1,4-dione (**6**, 56.4 mg, 0.30 mmol, 1.0 equiv), terminal alkenes (**2a**, 0.45 mmol, 47mg/0.51 mL, 1.5 equiv), Cu(OAc)<sub>2</sub> (0.30 mmol, 54 mg, 1.0 equiv), NaOAc (0.30 mmol, 41 mg, 1.0 equiv), Pd(OAc)<sub>2</sub> (10 mol %) and THF (solvent, 10 mL) was stirred for 4 h at 25 °C under air condition and determined by TLC. No reaction was observed.

## 6 Analytical Data for All Compounds

### 2-hydroxy-3-styrylnaphthalene-1,4-dione (**3a**)

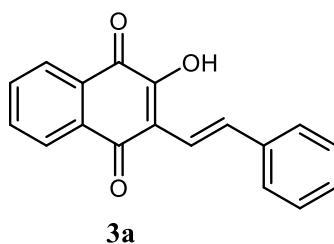

**Purification:** flash chromatography on silica gel (CH<sub>2</sub>Cl<sub>2</sub>/MeOH : 500/1)

**Yield:** 84% (70.2 mg)

**Physical appearance:** red solid

**M.p.** 145.2-146.8 °C; **<sup>1</sup>H NMR** (300 MHz, DMSO-*d*<sub>6</sub>): δ (ppm) 8.02 (td, *J* = 7.5, 1.5 Hz, 2H), 7.90-7.77 (m, 3H), 7.56 (d, *J* = 7.2 Hz, 2H), 7.40 (t, *J* = 7.4 Hz, 2H), 7.34 (d, *J* = 8.9 Hz, 1H), 7.29 (d, *J* = 6.7 Hz, 1H); **<sup>13</sup>C NMR** (75 MHz, CDCl<sub>3</sub>): δ (ppm) 183.67, 180.51, 151.18, 138.83, 137.29, 134.80, 134.50, 132.72, 132.24, 129.06, 128.23, 126.69, 126.22, 125.57, 118.21, 116.90; **HRMS** (ESI<sup>-</sup>): calc. for C<sub>18</sub>H<sub>11</sub>O<sub>3</sub> [M-H]<sup>-</sup>: 275.0714, found: 275.0701 *m/z*.

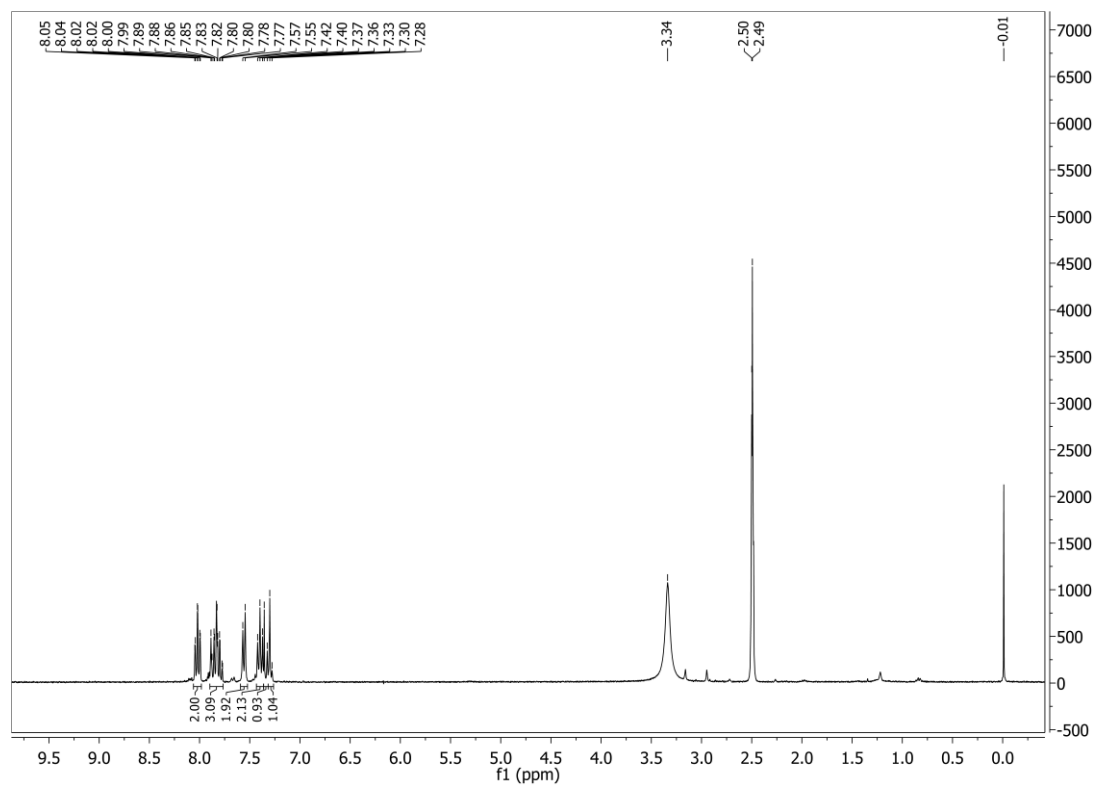

Figure E1 <sup>1</sup>H-NMR spectrum of **3a** in CDCl<sub>3</sub>

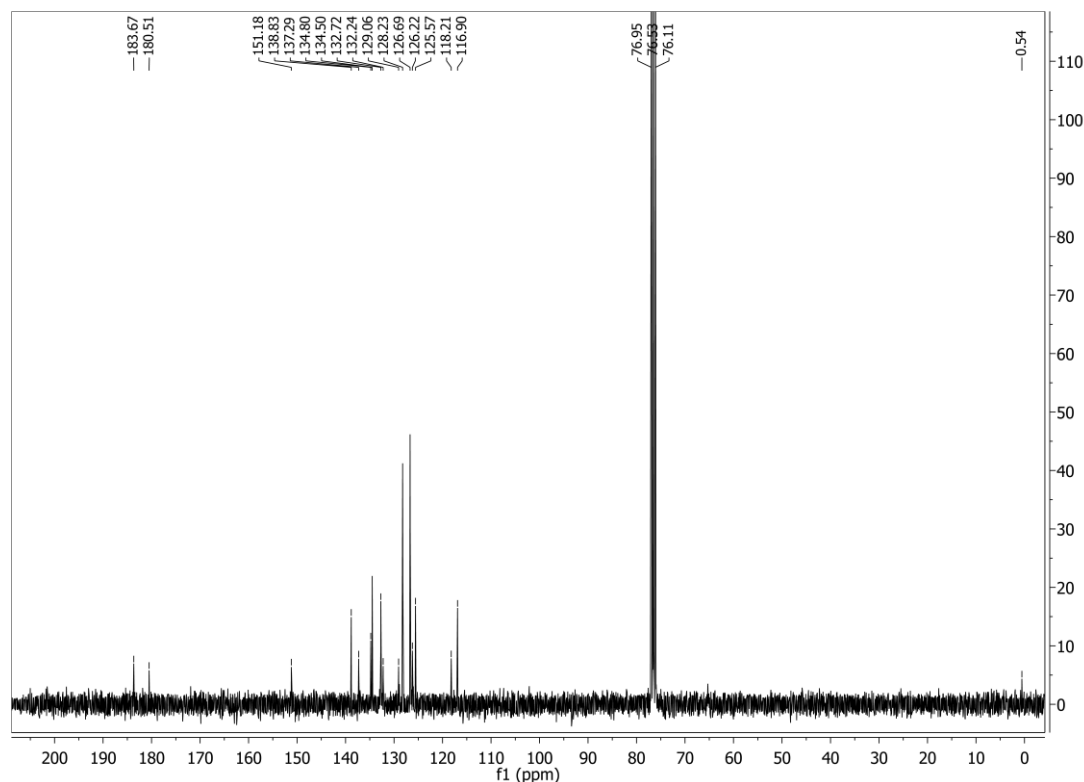Figure E2  $^{13}\text{C}$ -NMR spectrum of **3a** in  $\text{CDCl}_3$ **2-hydroxy-3-(4-methylstyryl)naphthalene-1,4-dione (3b)**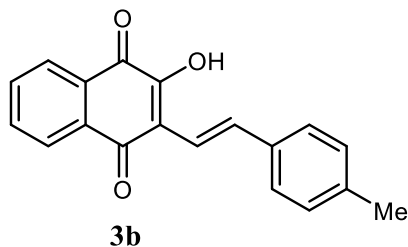

**Purification:** flash chromatography on silica gel ( $\text{CH}_2\text{Cl}_2/\text{MeOH}$  : 500/1)

**Yield:** 87% (75.7 mg)

**Physical appearance:** red solid

**M.p.** 125.6-126.7 °C;  $^1\text{H}$  NMR (300 MHz,  $\text{DMSO}-d_6$ ):  $\delta$  (ppm) 8.02 (td,  $J = 7.4, 1.5$  Hz, 2H), 7.90 – 7.76 (m, 3H), 7.46 (d,  $J = 8.3$  Hz, 2H), 7.28 (d,  $J = 16.8$  Hz, 1H), 7.21 (d,  $J = 7.8$  Hz, 2H), 2.32 (s, 3H);  $^{13}\text{C}$  NMR (75 MHz,  $\text{CDCl}_3$ ):  $\delta$  (ppm) 184.27, 180.97, 151.45, 139.41, 138.88, 135.08, 134.92, 133.20, 132.76, 129.61, 129.48, 127.21, 127.15, 126.03, 118.97, 116.43, 21.40; **HRMS** (ESI $^-$ ): calc. for  $\text{C}_{19}\text{H}_{13}\text{O}_3$  [ $\text{M}-\text{H}$ ] $^-$ : 289.087, found: 289.0864  $m/z$ .

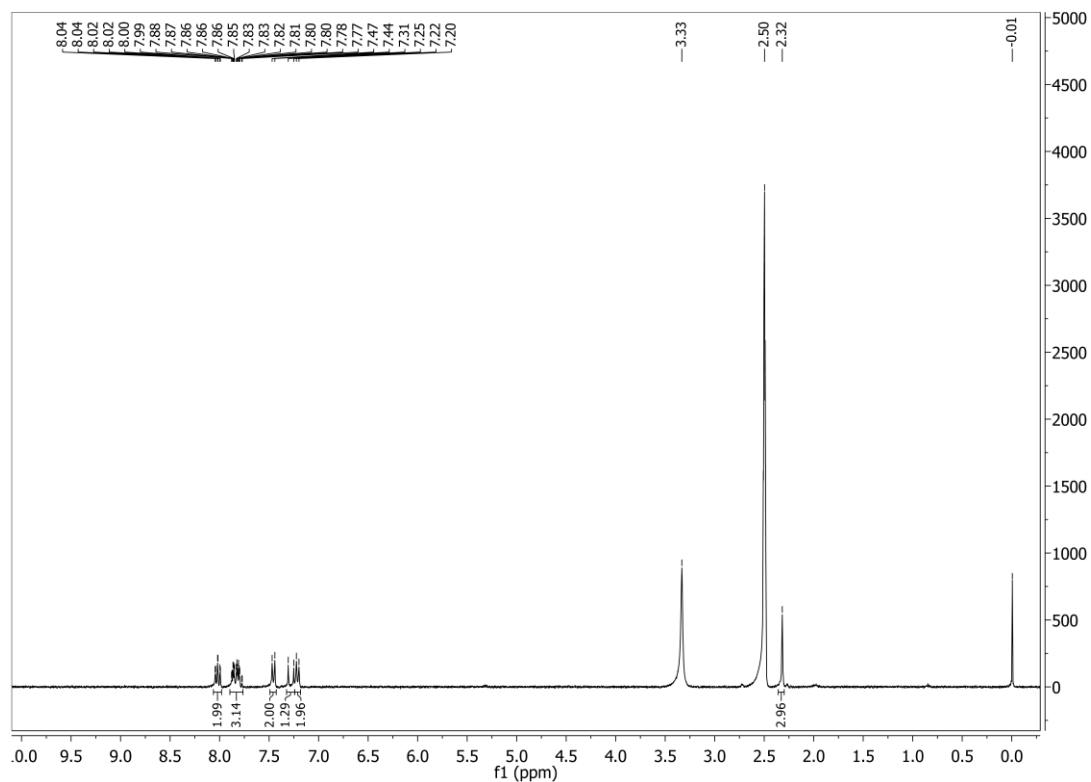Figure E3 <sup>1</sup>H-NMR spectrum of **3b** in CDCl<sub>3</sub>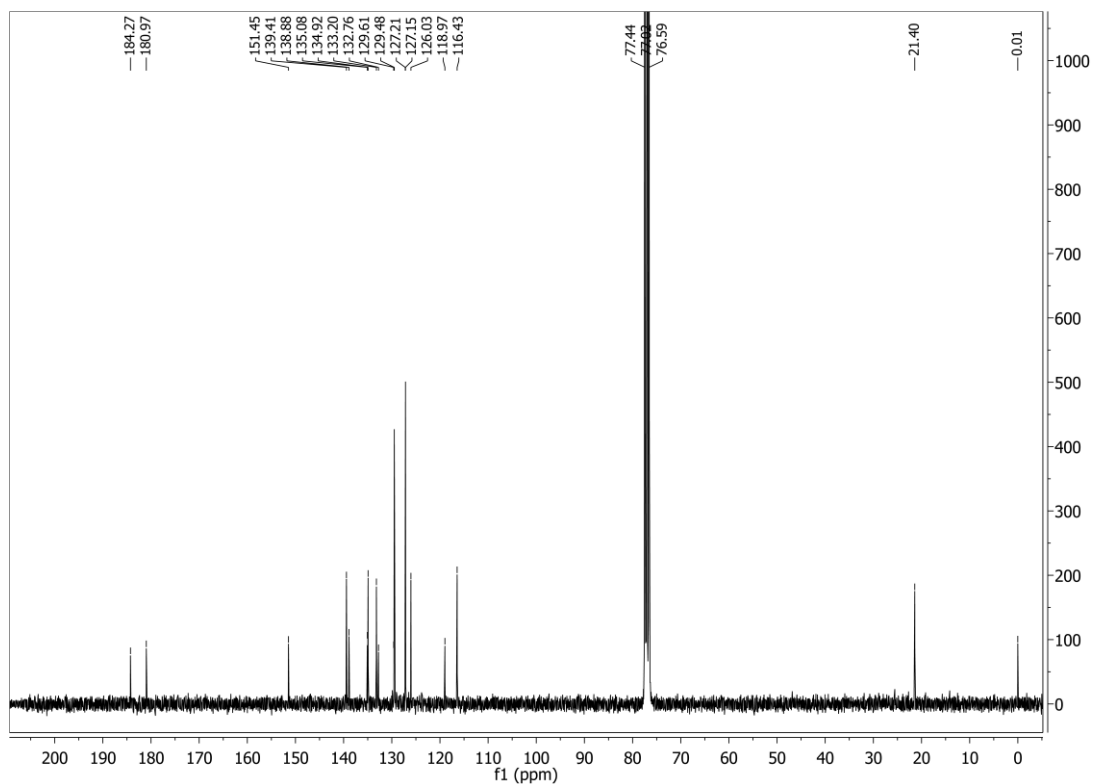Figure E4 <sup>13</sup>C-NMR spectrum of **3b** in CDCl<sub>3</sub>**2-(2,4-dimethylstyryl)-3-hydroxynaphthalene-1,4-dione (3c)**

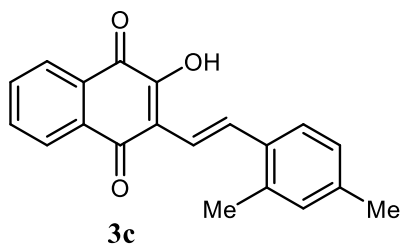

**Purification:** flash chromatography on silica gel (CH<sub>2</sub>Cl<sub>2</sub>/MeOH : 500/1)

**Yield:** 89% (80.9 mg)

**Physical appearance:** red solid

**M.p.** 118.4-119.8 °C; **<sup>1</sup>H NMR** (300 MHz, CDCl<sub>3</sub>): δ (ppm) 8.19 (d, *J* = 7.5 Hz, 1H), 8.11 (d, *J* = 7.4 Hz, 1H), 7.96 (s, 1H), 7.79 (d, *J* = 141 Hz, 1H), 7.75 (dt, *J* = 20.9, 7.2 Hz, 2H), 7.65 (d, *J* = 7.8 Hz, 1H), 7.06 (d, *J* = 13.9 Hz, 2H), 2.44 (s, 3H), 2.35 (s, 3H); **<sup>13</sup>C NMR** (75 MHz, CDCl<sub>3</sub>): δ (ppm) 184.33, 181.08, 151.46, 138.61, 137.23, 136.62, 134.90, 134.09, 133.17, 132.87, 131.32, 129.69, 127.16, 127.11, 126.02, 125.37, 119.30, 117.43, 21.23, 19.76; **HRMS** (ESI): calc. for C<sub>20</sub>H<sub>15</sub>O<sub>3</sub> [M-H]<sup>-</sup>: 303.1027, found: 303.1030 *m/z*.

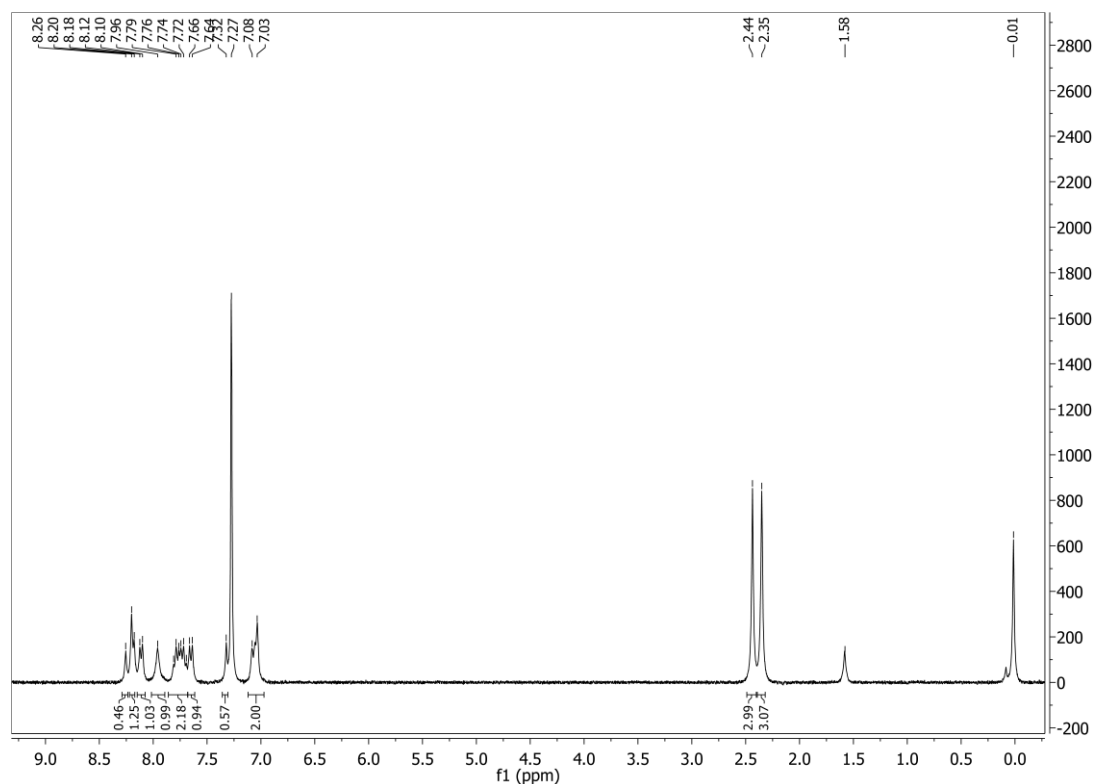

Figure E5 <sup>1</sup>H-NMR spectrum of **3c** in CDCl<sub>3</sub>



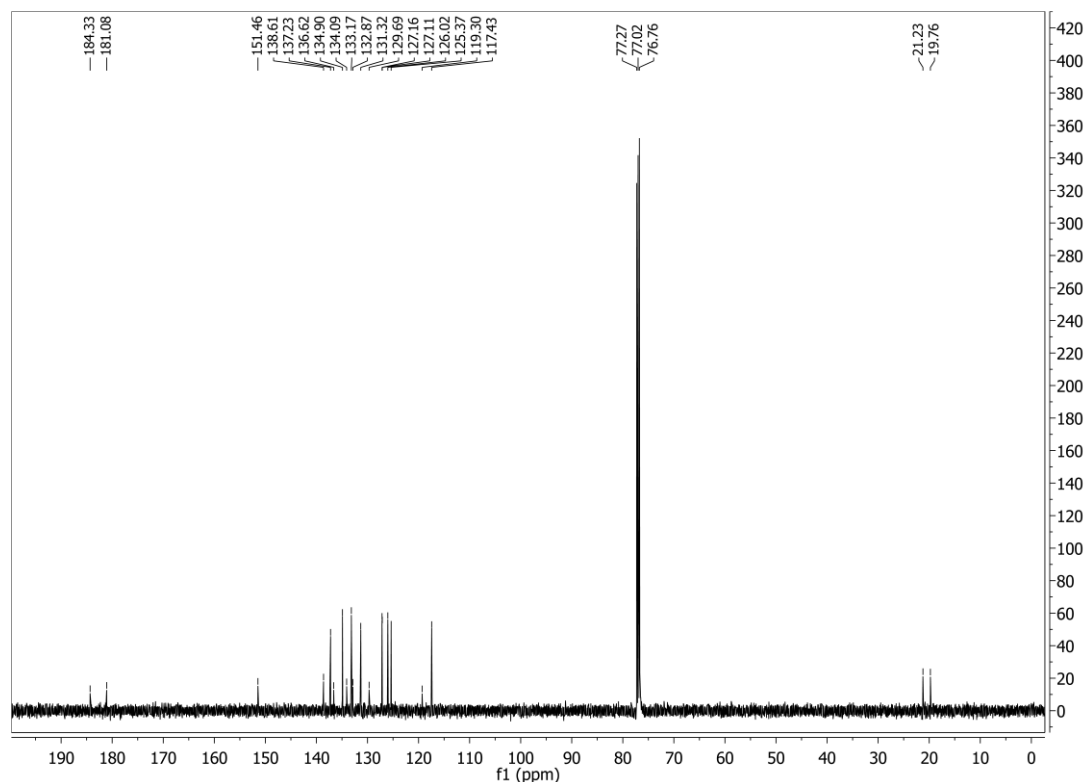Figure E6  $^{13}\text{C}$ -NMR spectrum of **3c** in  $\text{CDCl}_3$ **2-(2,5-dimethylstyryl)-3-hydroxynaphthalene-1,4-dione (3d)**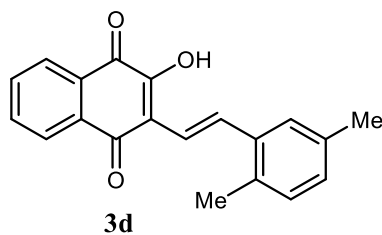

**Purification:** flash chromatography on silica gel ( $\text{CH}_2\text{Cl}_2/\text{MeOH}$  : 500/1)

**Yield:** 88% (80.3 mg)

**Physical appearance:** red solid

**M.p.** 120.2-123.0  $^\circ\text{C}$ ;  $^1\text{H NMR}$  (300 MHz,  $\text{CDCl}_3$ ):  $\delta$  (ppm) 8.23 (d,  $J = 11.9$  Hz, 1H), 8.19 (d,  $J = 2.6$  Hz, 1H), 8.11 (d,  $J = 7.6$  Hz, 1H), 7.76 (dt,  $J = 21.5, 7.4$  Hz, 2H), 7.55 (s, 1H), 7.34 (d,  $J = 15$  Hz, 1H), 7.07 (q,  $J = 7.3$  Hz, 2H), 2.42 (s, 3H), 2.38 (s, 3H);  $^{13}\text{C NMR}$  (75 MHz,  $\text{CDCl}_3$ ):  $\delta$  (ppm) 183.81, 180.58, 151.07, 136.83, 136.03, 135.15, 134.46, 133.18, 132.71, 132.25, 129.91, 129.09, 128.91, 126.66, 125.54, 125.39, 118.56, 117.50, 20.57, 18.89; **HRMS** (ESI): calc. for  $\text{C}_{20}\text{H}_{15}\text{O}_3$   $[\text{M}-\text{H}]^-$ : 303.1027, found: 303.1019  $m/z$ .

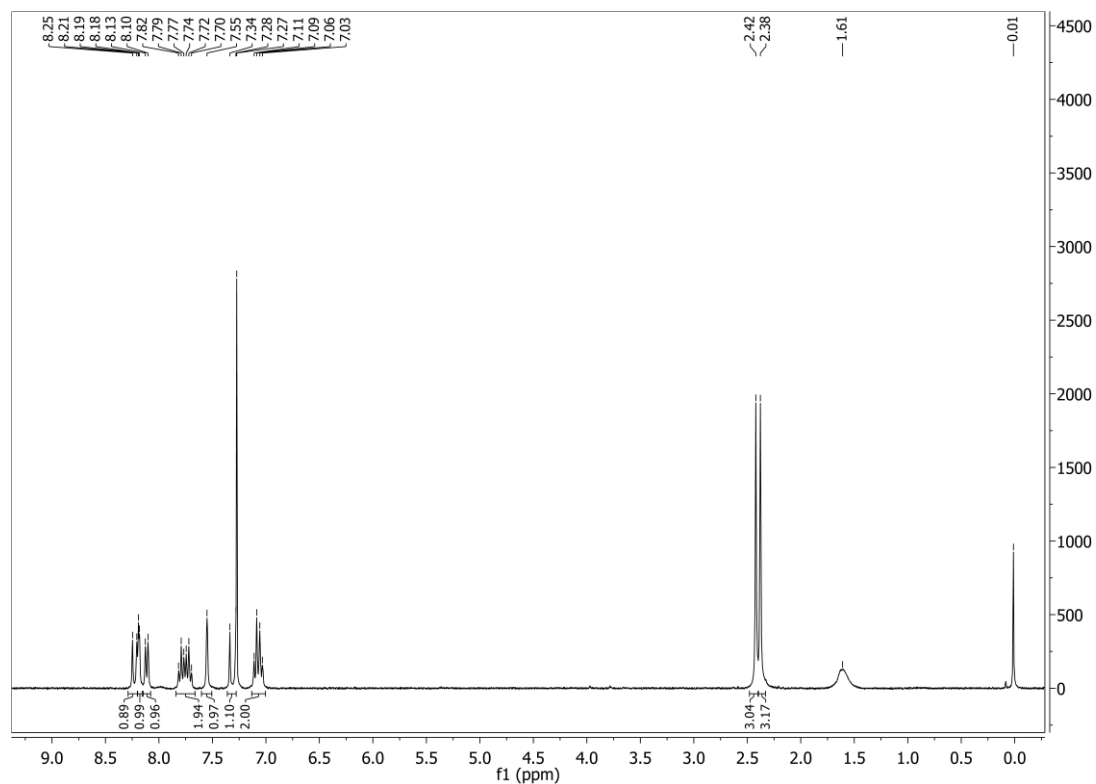Figure E7  $^1\text{H}$ -NMR spectrum of **3d** in  $\text{CDCl}_3$ 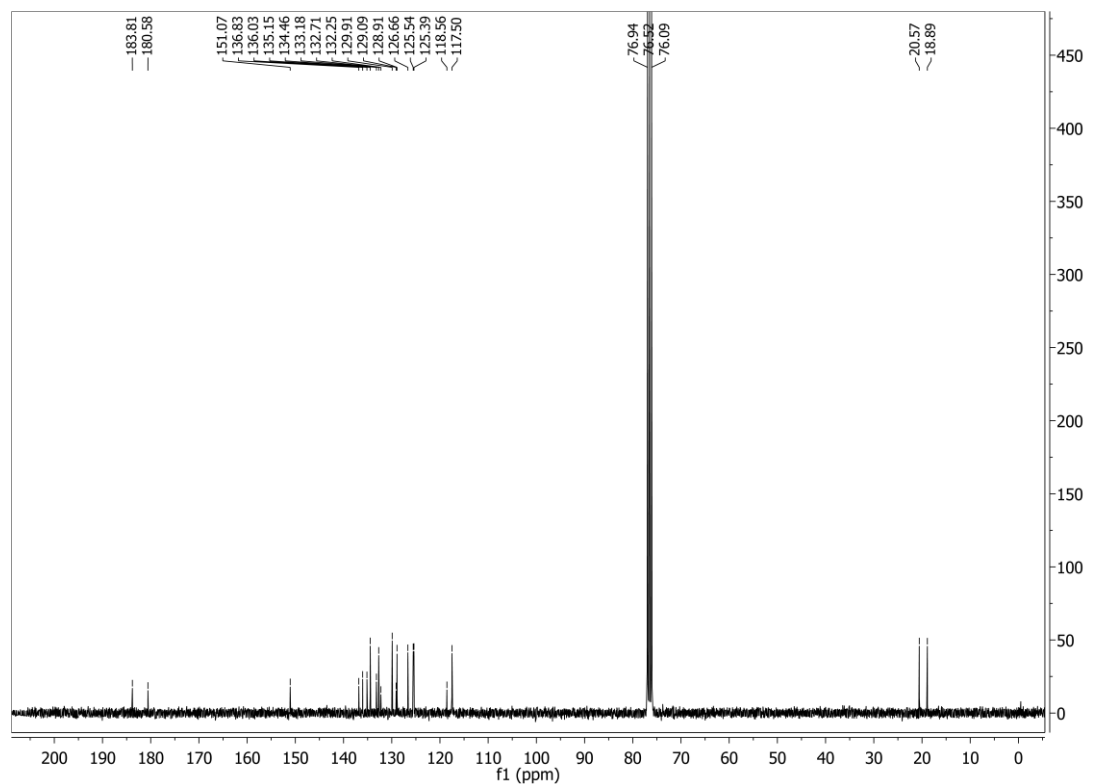Figure E8  $^{13}\text{C}$ -NMR spectrum of **3d** in  $\text{CDCl}_3$ **2-hydroxy-3-(4-methoxystyryl)naphthalene-1,4-dione (3e)**

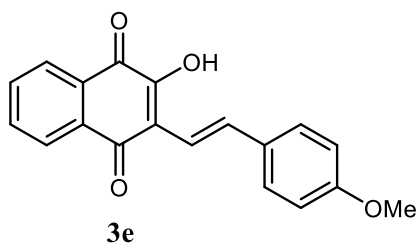

**Purification:** flash chromatography on silica gel (CH<sub>2</sub>Cl<sub>2</sub>/MeOH : 500/1)

**Yield:** 91% (83.5 mg)

**Physical appearance:** red solid

**M.p.** 143.2-145.8 °C; **<sup>1</sup>H NMR** (300 MHz, DMSO-*d*<sub>6</sub>): δ (ppm) 8.01 (td, *J* = 7.2, 1.2 Hz, 2H), 7.89-7.78 (m, 3H), 7.51 (d, *J* = 8.6 Hz, 2H), 6.97 (d, *J* = 8.7 Hz, 2H), 3.79 (s, 3H); **<sup>13</sup>C NMR** (75 MHz, CDCl<sub>3</sub>): δ (ppm) 184.32, 180.87, 160.24, 151.20, 139.08, 134.79, 133.14, 132.78, 130.73, 129.68, 128.62, 127.09, 125.96, 119.20, 115.30, 114.21, 55.34; **HRMS** (ESI): calc. for C<sub>19</sub>H<sub>13</sub>O<sub>4</sub> [M-H]<sup>-</sup>: 305.0819, found: 305.0822 *m/z*.

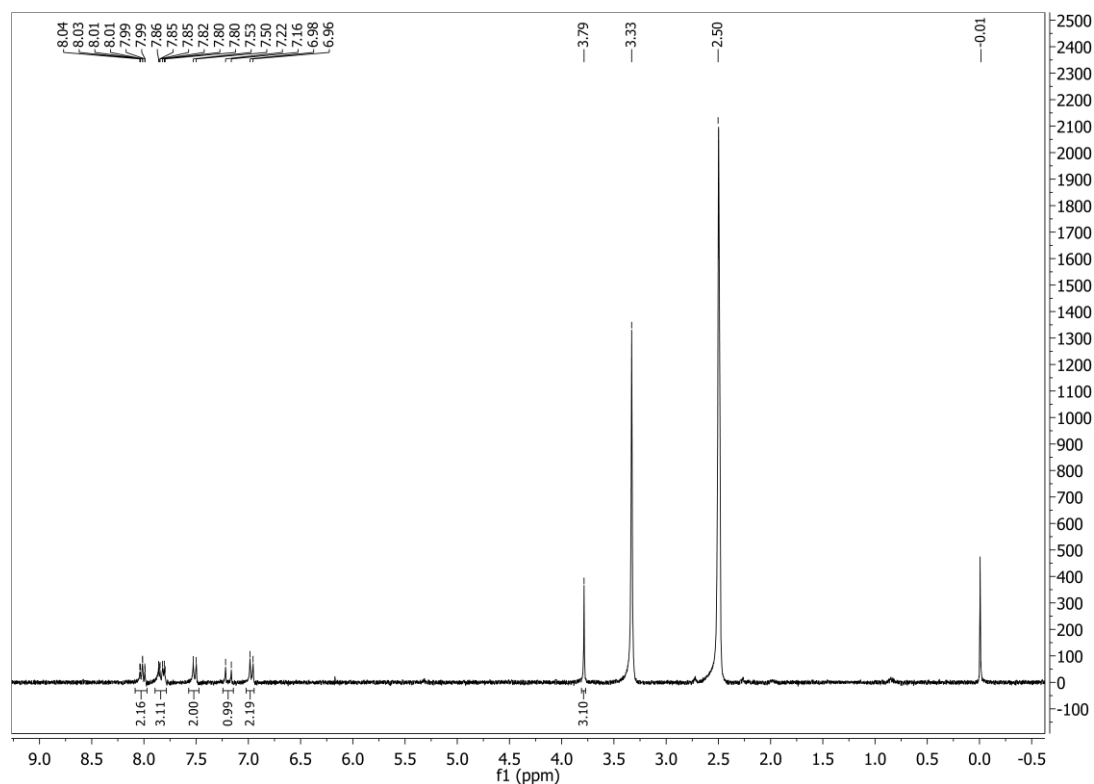

Figure E9 <sup>1</sup>H-NMR spectrum of **3e** in CDCl<sub>3</sub>

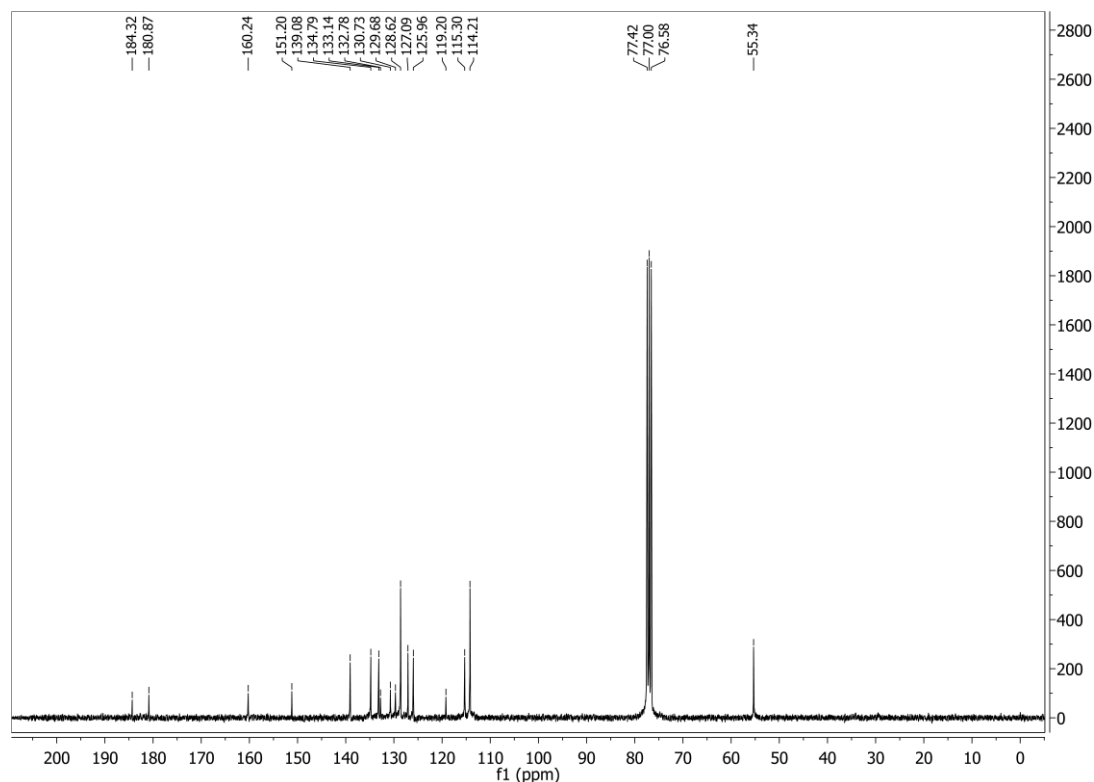Figure E10  $^{13}\text{C}$ -NMR spectrum of **3e** in  $\text{CDCl}_3$ **2-hydroxy-3-(2-methoxystyryl)naphthalene-1,4-dione (3f)**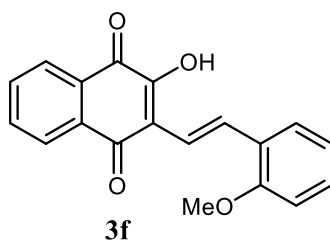

**Purification:** flash chromatography on silica gel ( $\text{CH}_2\text{Cl}_2/\text{MeOH}$  : 500/1)

**Yield:** 90% (82.6 mg)

**Physical appearance:** red solid

**M.p.** 144.5-146.2  $^{\circ}\text{C}$ ;  $^1\text{H NMR}$  (300 MHz,  $\text{CDCl}_3$ ):  $\delta$  (ppm) 8.32 (d,  $J$  = 16.9 Hz, 1H), 8.19 (dd,  $J$  = 7.3, 1.2 Hz, 1H), 8.11 (dd,  $J$  = 7.7, 1.1 Hz, 1H), 7.78 (td,  $J$  = 7.6, 1.6 Hz, 1H), 7.72 (ddd,  $J$  = 7.7, 4.3, 1.7 Hz, 2H), 7.64 (d,  $J$  = 99 Hz, 1H) 7.42 (d,  $J$  = 16.9 Hz, 1H), 7.01 (t,  $J$  = 6.9 Hz, 1H), 6.93 (d,  $J$  = 8.5 Hz, 1H), 3.93 (s, 3H);  $^{13}\text{C NMR}$  (75 MHz,  $\text{CDCl}_3$ ):  $\delta$  (ppm) 183.78, 180.52, 156.85, 151.00, 134.75, 134.37, 133.69, 132.64, 132.26, 129.36, 129.14, 126.63, 126.27, 125.50, 120.29, 118.81, 117.22, 110.45, 55.11; **HRMS** (ESI $^-$ ): calc. for  $\text{C}_{19}\text{H}_{13}\text{O}_4$  [ $\text{M}-\text{H}$ ] $^-$ : 305.0819, found: 305.0809  $m/z$ .

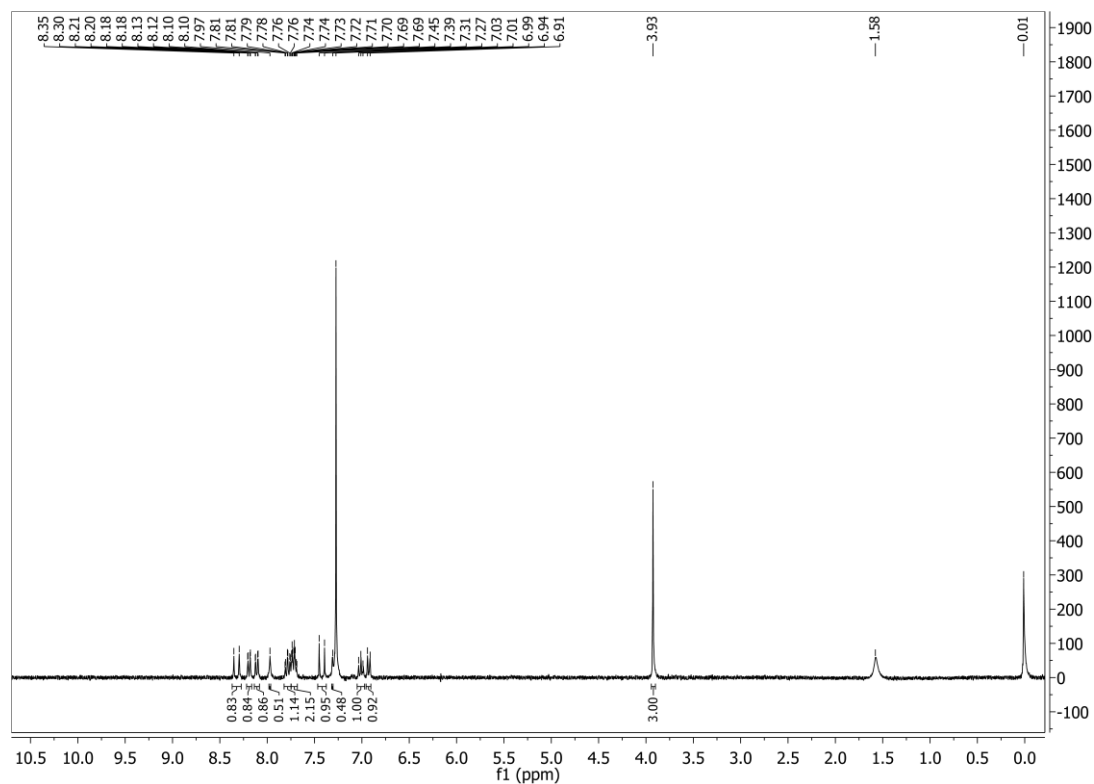Figure E11 <sup>1</sup>H-NMR spectrum of **3f** in CDCl<sub>3</sub>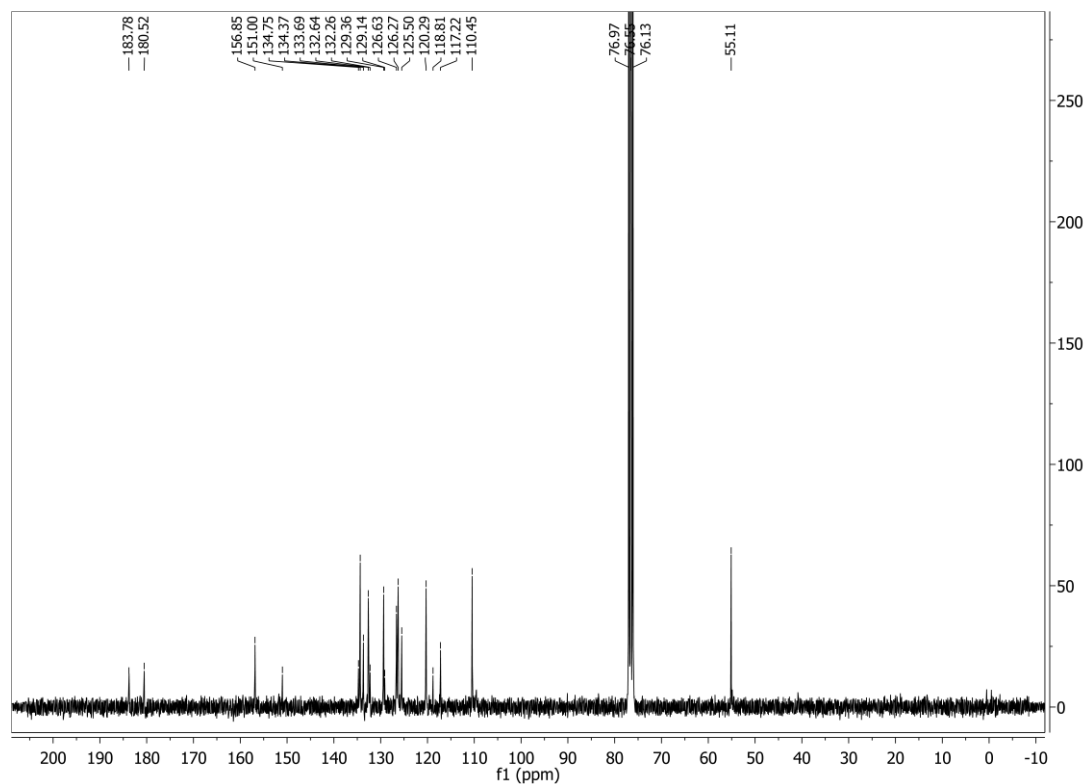Figure E12 <sup>13</sup>C-NMR spectrum of **3f** in CDCl<sub>3</sub>

**2-(2,4-dimethoxystyryl)-3-hydroxynaphthalene-1,4-dione (3g)**

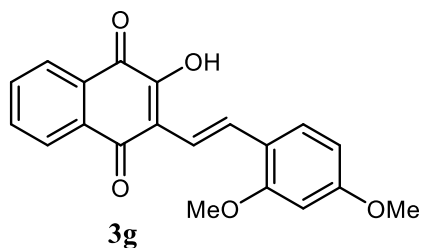

**Purification:** flash chromatography on silica gel (CH<sub>2</sub>Cl<sub>2</sub>/MeOH : 500/1)

**Yield:** 92% (92.8 mg)

**Physical appearance:** dark red solid

**M.p.** 132.5-133.8 °C; **<sup>1</sup>H NMR** (300 MHz, CDCl<sub>3</sub>): δ (ppm) 8.09 (d, *J* = 7.7 Hz, 1H), 7.92 (d, *J* = 7.9 Hz, 1H), 7.78 – 7.70 (m, 1H), 7.52 (t, *J* = 7.5 Hz, 1H), 6.97 (d, *J* = 8.2 Hz, 1H), 6.48 (d, *J* = 2.2 Hz, 2H), 6.41 (d, *J* = 2.2 Hz, 1H), 6.39 (d, *J* = 2.3 Hz, 1H), 3.81 (s, 3H), 3.77 (s, 3H); **<sup>13</sup>C NMR** (75 MHz, CDCl<sub>3</sub>): δ (ppm) 183.68, 180.92, 160.12, 157.28, 146.59, 134.93, 129.25, 128.89, 128.06, 127.89, 127.09, 126.49, 123.47, 122.68, 121.64, 115.02, 103.42, 98.82, 54.94, 54.74.; **HRMS** (ESI<sup>-</sup>): calc. for C<sub>20</sub>H<sub>16</sub>O<sub>5</sub> [M-H]<sup>-</sup>: 335.0925, found: 335.0916 *m/z*.

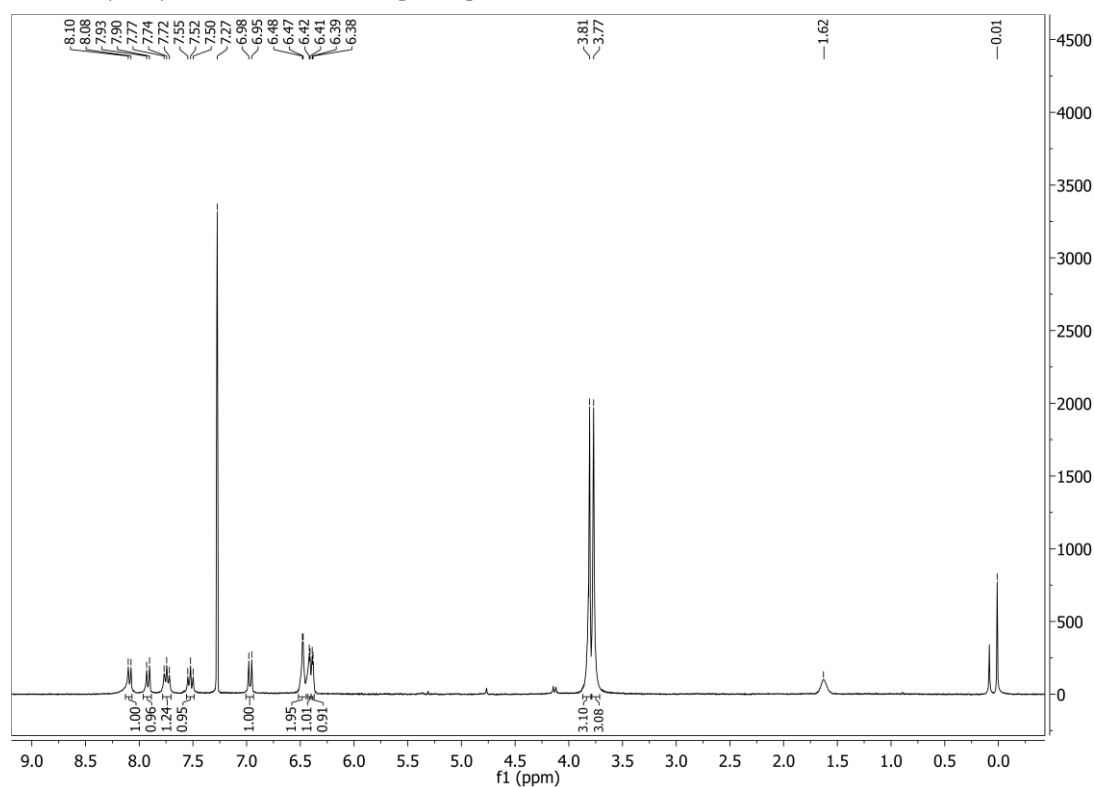

Figure E13 <sup>1</sup>H-NMR spectrum of **3g** in CDCl<sub>3</sub>

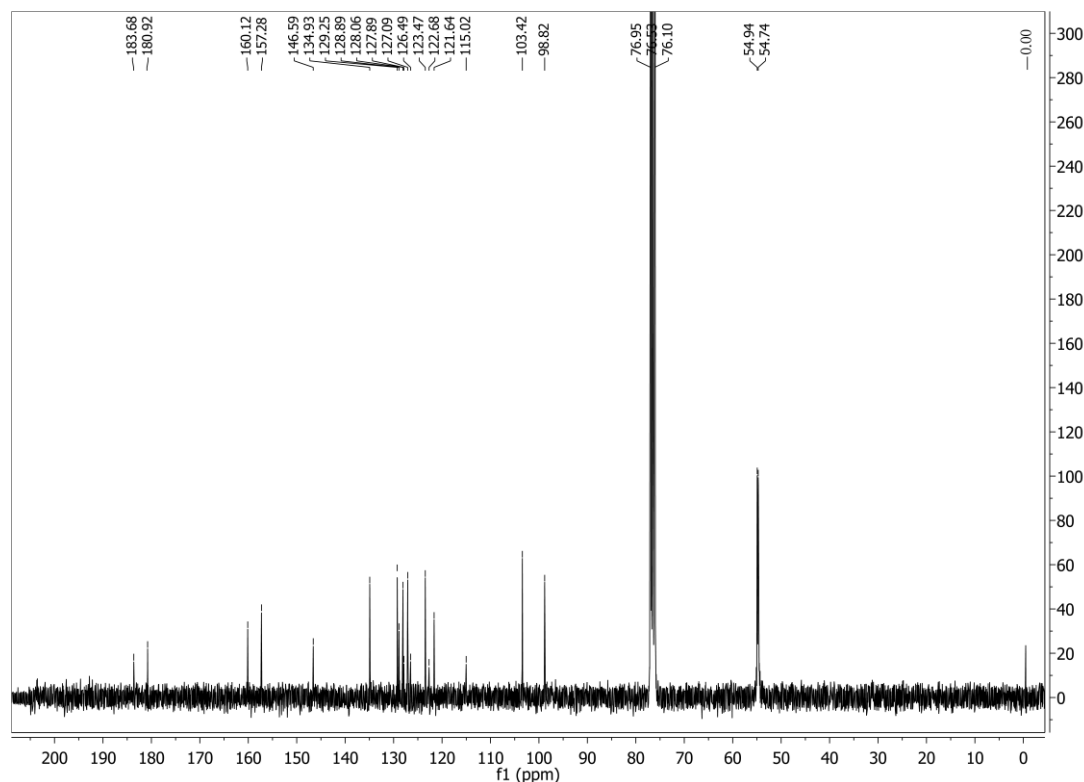Figure E14  $^{13}\text{C}$ -NMR spectrum of **3g** in  $\text{CDCl}_3$ **2-(4-fluorostyryl)-3-hydroxynaphthalene-1,4-dione (3h)**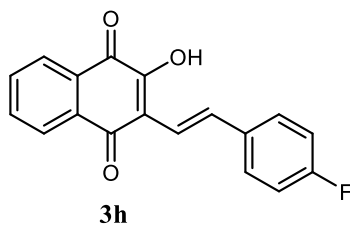

**Purification:** flash chromatography on silica gel ( $\text{CH}_2\text{Cl}_2/\text{MeOH}$  : 500/1)

**Yield:** 66% (58.4 mg)

**Physical appearance:** red solid

**M.p.** 202.2-204.5 °C;  $^1\text{H}$  NMR (300 MHz,  $\text{CDCl}_3$ ):  $\delta$  (ppm) 8.17 (d,  $J$  = 7.4 Hz, 1H), 8.10 (d,  $J$  = 7.4 Hz, 1H), 7.97 (d,  $J$  = 9.4 Hz, 1H), 7.75 (dt,  $J$  = 21.8, 7.4 Hz, 2H), 7.62 (d,  $J$  = 85.5 Hz, 1H), 7.57 (dd,  $J$  = 8.1, 5.6 Hz, 2H), 7.07 (t,  $J$  = 8.5 Hz, 2H);  $^{13}\text{C}$  NMR (75 MHz,  $\text{CDCl}_3$ ):  $\delta$  (ppm) 183.63, 180.46, 162.48 ( $^1J_{\text{CF}}$  = 123.8 Hz), 151.13, 137.48, 134.52, 133.53, 132.75, 132.20, 129.04, 128.30 ( $^2J_{\text{CF}}$  = 4.1 Hz), 126.67, 125.59, 118.06, 116.63 ( $^3J_{\text{CF}}$  = 1.1 Hz), 115.25 ( $^4J_{\text{CF}}$  = 10.5 Hz); **HRMS** (ESI $^-$ ): calc. for  $\text{C}_{18}\text{H}_{10}\text{FO}_3$  [ $\text{M}-\text{H}$ ] $^-$ : 293.0619, found: 293.0622  $m/z$ .

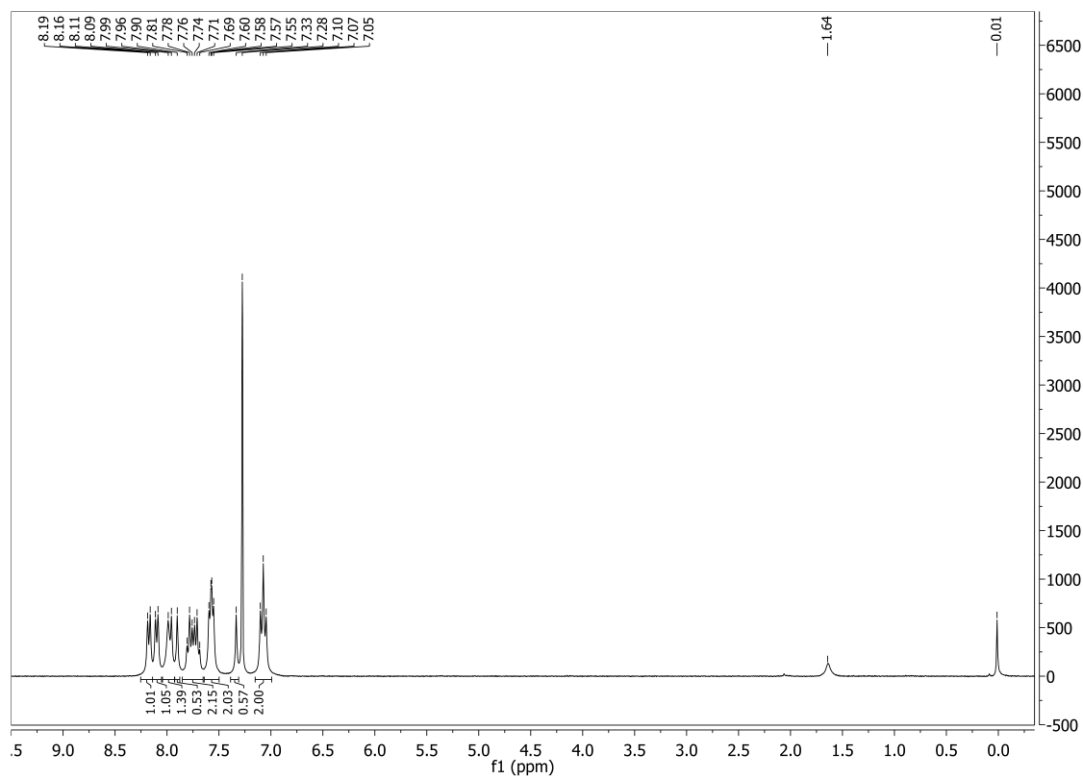Figure E15  $^1\text{H}$ -NMR spectrum of **3h** in  $\text{CDCl}_3$ 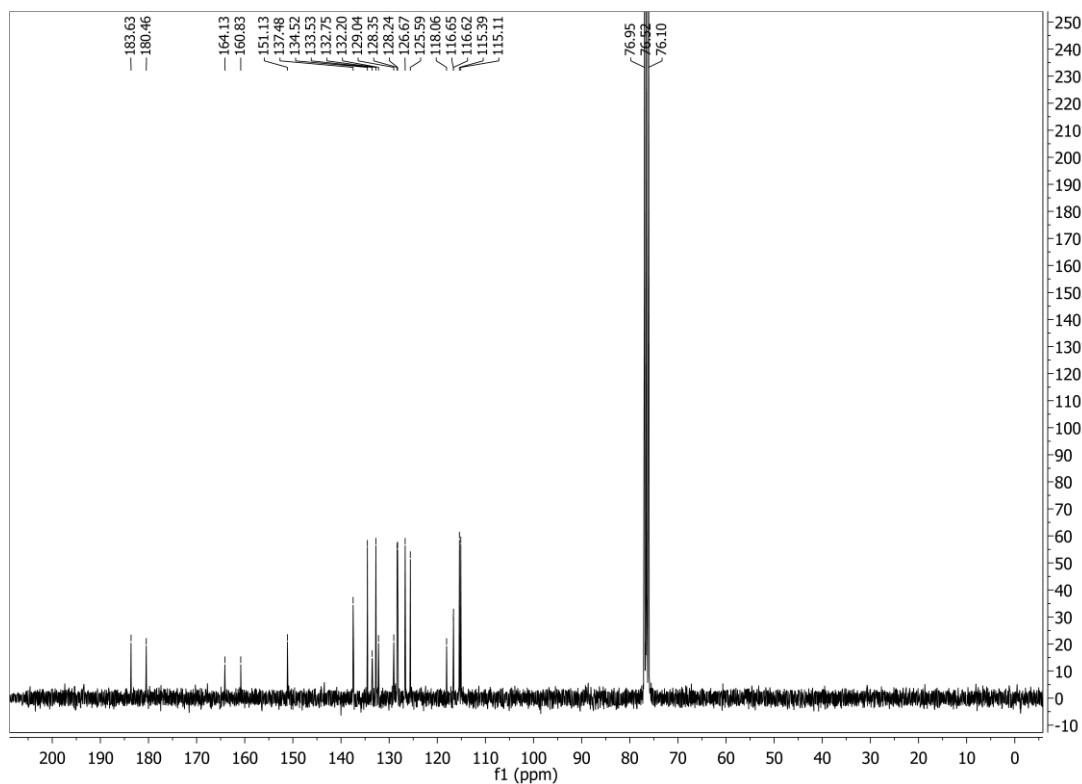Figure E16  $^{13}\text{C}$ -NMR spectrum of **3h** in  $\text{CDCl}_3$ **2-(4-chlorostyryl)-3-hydroxynaphthalene-1,4-dione (3i)**



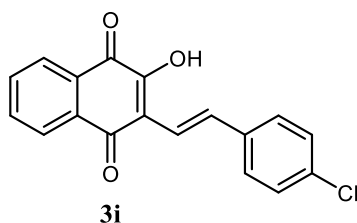

**Purification:** flash chromatography on silica gel (CH<sub>2</sub>Cl<sub>2</sub>/MeOH : 500/1)

**Yield:** 74% (69.6 mg)

**Physical appearance:** red solid

**M.p.** 192.3-194.8 °C; **<sup>1</sup>H NMR** (300 MHz, CDCl<sub>3</sub>): δ (ppm) 8.20 (d, *J* = 7.1 Hz, 1H), 8.12 (d, *J* = 7.4 Hz, 1H), 7.93 (d, *J* = 16.6 Hz, 1H), 7.84- 7.69 (m, 2H), 7.54 (d, *J* = 8.3 Hz, 2H), 7.42-7.33 (m, 3H); **<sup>13</sup>C NMR** (75 MHz, CDCl<sub>3</sub>): δ (ppm) 184.07, 180.98, 151.82, 137.80, 136.30, 135.10, 134.34, 133.30, 132.71, 129.53, 128.94, 128.31, 127.21, 126.14, 118.39, 117.96; **HRMS** (ESI<sup>-</sup>): calc. for C<sub>18</sub>H<sub>10</sub>ClO<sub>3</sub> [M-H]<sup>-</sup>: 309.0324, found: 309.0325 *m/z*.

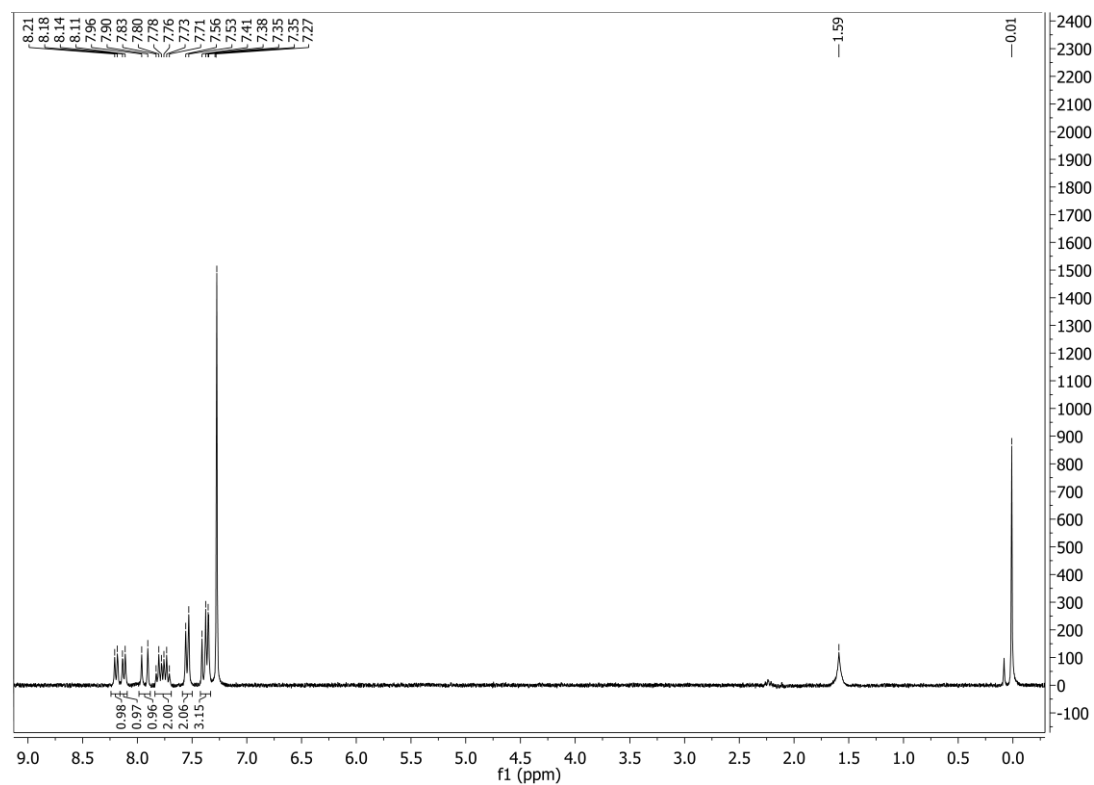

Figure E17 <sup>1</sup>H-NMR spectrum of **3i** in CDCl<sub>3</sub>

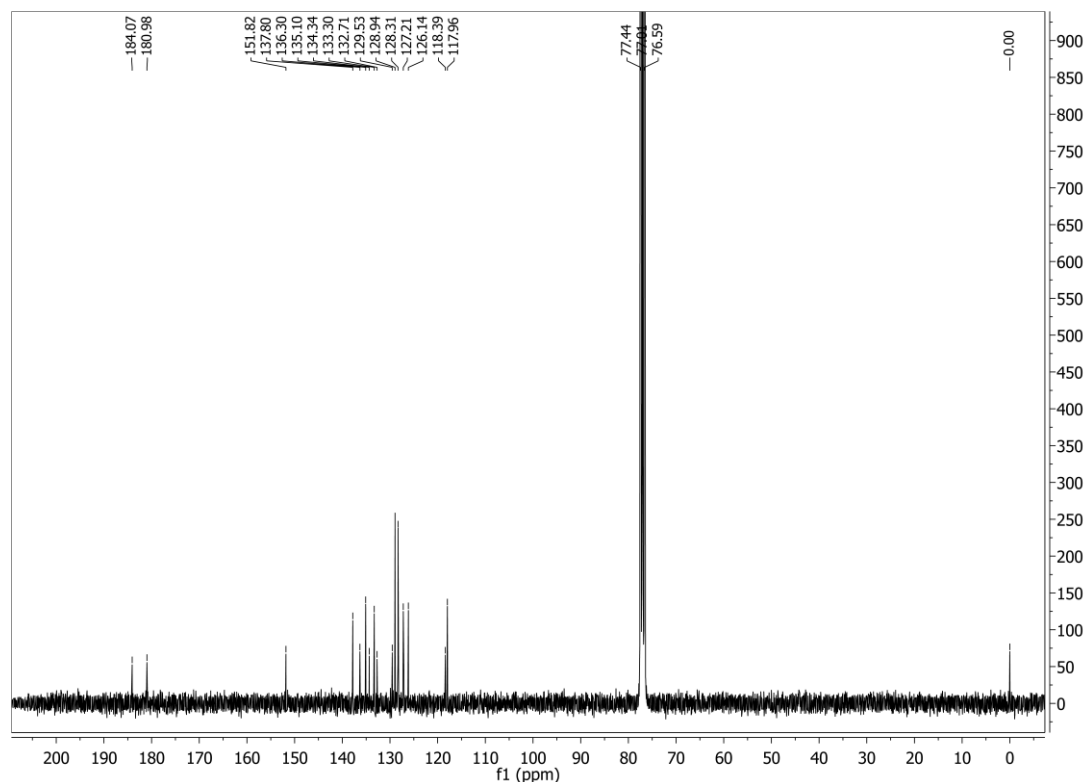Figure E18  $^{13}\text{C}$ -NMR spectrum of **3i** in  $\text{CDCl}_3$ **2-(2-chlorostyryl)-3-hydroxynaphthalene-1,4-dione (**3j**)**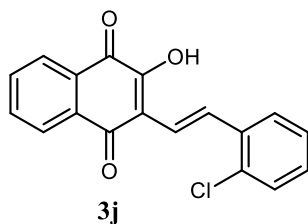

**Purification:** flash chromatography on silica gel ( $\text{CH}_2\text{Cl}_2/\text{MeOH}$  : 500/1)

**Yield:** 74% (68.8 mg)

**Physical appearance:** red solid

**M.p.** 193.8-195.7  $^{\circ}\text{C}$ ;  $^1\text{H}$  NMR (300 MHz,  $\text{CDCl}_3$ ):  $\delta$  (ppm) 8.36 (d,  $J = 17.2$  Hz, 1H), 8.21 (d,  $J = 7.3$  Hz, 1H), 8.18-8.02 (m, 2H), 7.88-7.67 (m, 3H), 7.48-7.30 (m, 3H);  $^{13}\text{C}$  NMR (75 MHz,  $\text{CDCl}_3$ ):  $\delta$  (ppm) 183.97, 181.11, 152.11, 136.03, 135.11, 134.17, 133.28, 132.79, 129.91, 129.60, 129.43, 127.27, 127.00, 126.76, 126.17, 119.80, 118.44, 113.58; **HRMS** (ESI $^-$ ): calc. for  $\text{C}_{18}\text{H}_{10}\text{ClO}_3$  [ $\text{M}-\text{H}$ ] $^-$ : 309.0324, found: 309.0309  $m/z$ .

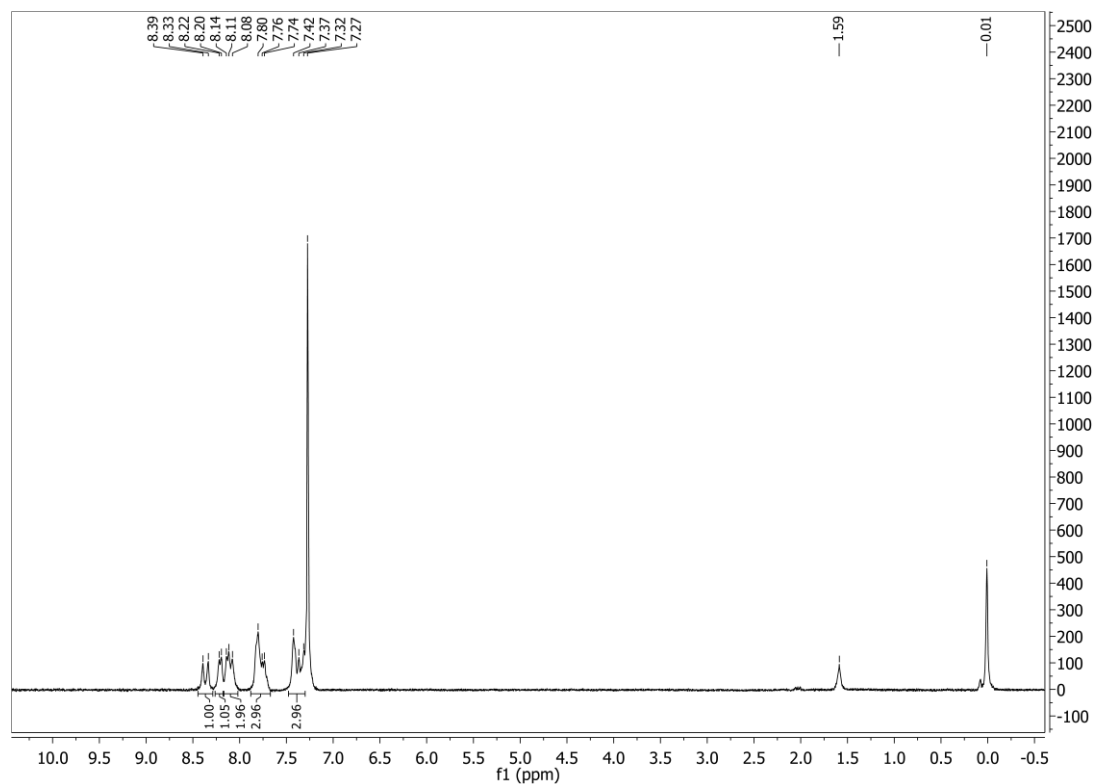Figure E19  $^1\text{H}$ -NMR spectrum of **3j** in  $\text{CDCl}_3$ 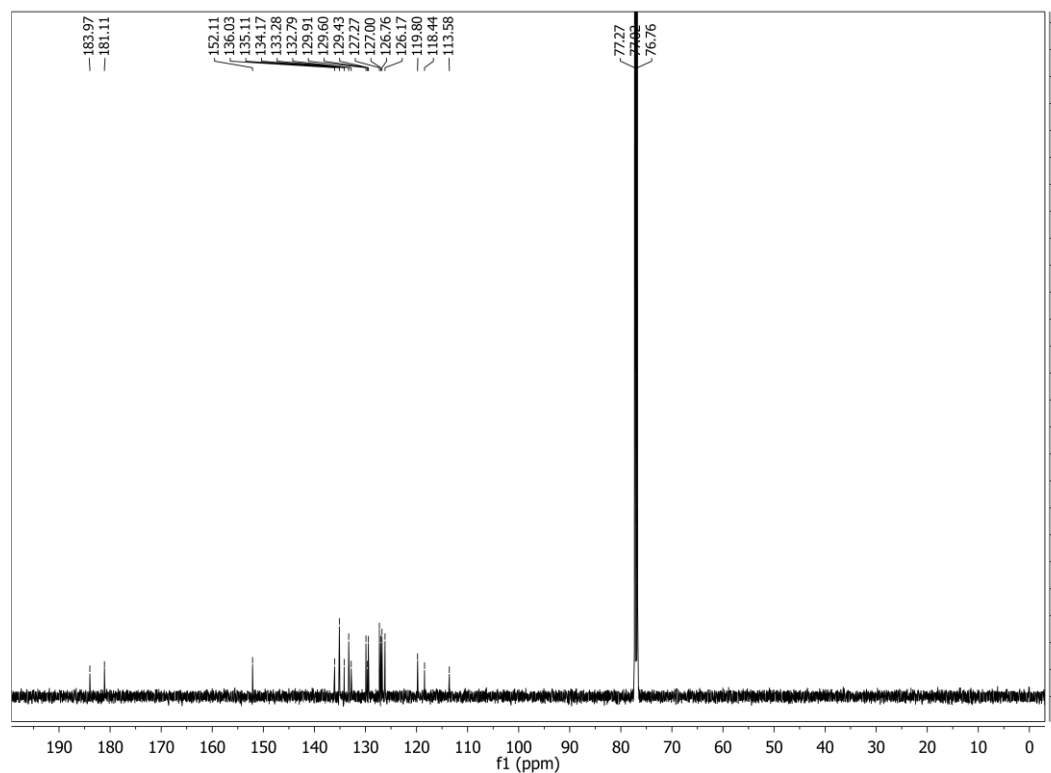Figure E20  $^{13}\text{C}$ -NMR spectrum of **3j** in  $\text{CDCl}_3$ 

**2-(2,4-dichlorostyryl)-3-hydroxynaphthalene-1,4-dione (3k)**

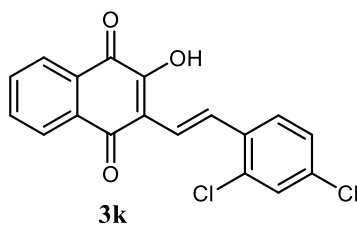

**Purification:** flash chromatography on silica gel (CH<sub>2</sub>Cl<sub>2</sub>/MeOH : 500/1)

**Yield:** 65% (64.6 mg)

**Physical appearance:** red solid

**M.p.** 212.9-215.4 °C; **<sup>1</sup>H NMR** (300 MHz, CDCl<sub>3</sub>): δ (ppm) 8.28 (d, *J* = 16.5 Hz, 1H), 8.20 (d, *J* = 6.8 Hz, 1H), 8.13 (d, *J* = 7.3 Hz, 1H), 7.81 (t, *J* = 7.3 Hz, 1H), 7.74 (dd, *J* = 7.8, 4.6 Hz, 2H), 7.43 (d, *J* = 1.7 Hz, 1H), 7.37 (d, *J* = 16.6 Hz, 1H), 7.32-7.28 (m, 1H); **<sup>13</sup>C NMR** (75 MHz, CDCl<sub>3</sub>): δ (ppm) 183.85, 180.99, 152.18, 135.19, 134.53, 134.45, 133.65, 133.34, 132.63, 129.64, 129.48, 127.40, 127.37, 127.26, 126.20, 120.17, 120.16, 118.04; **HRMS** (ESI<sup>-</sup>): calc. for C<sub>18</sub>H<sub>9</sub>Cl<sub>2</sub>O<sub>3</sub> [M-H]<sup>-</sup>: 342.9934, found: 342.9926 *m/z*.

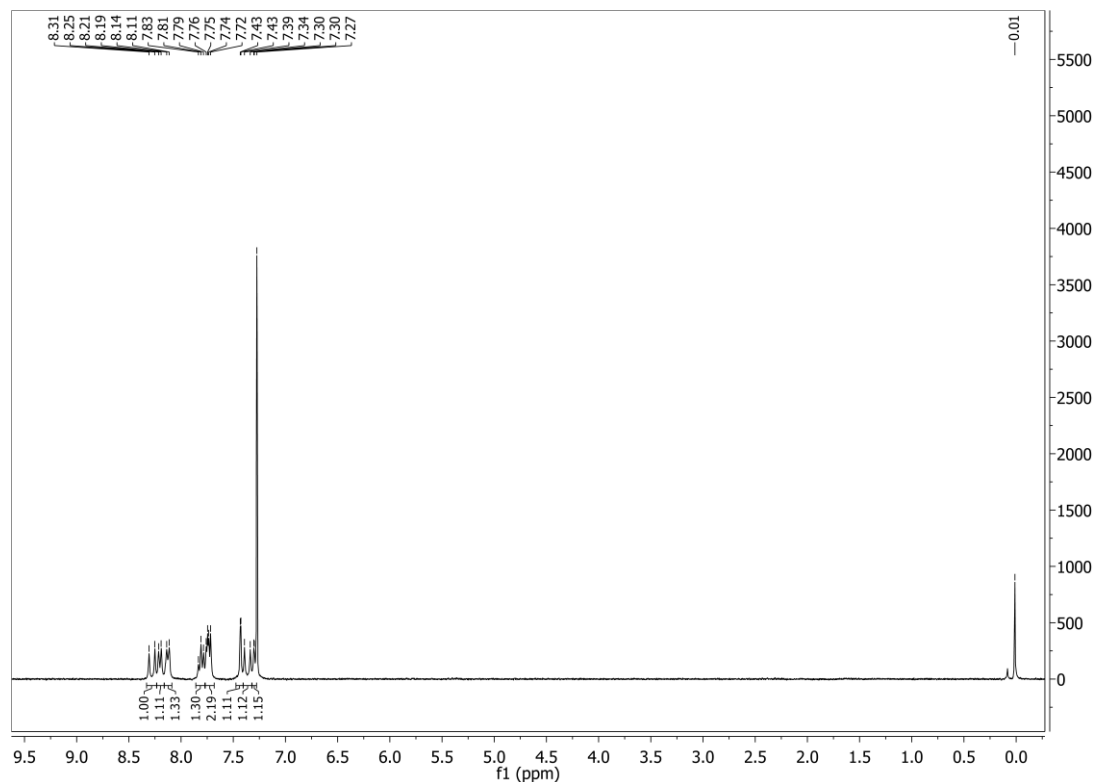

Figure E21 <sup>1</sup>H-NMR spectrum of **3k** in CDCl<sub>3</sub>

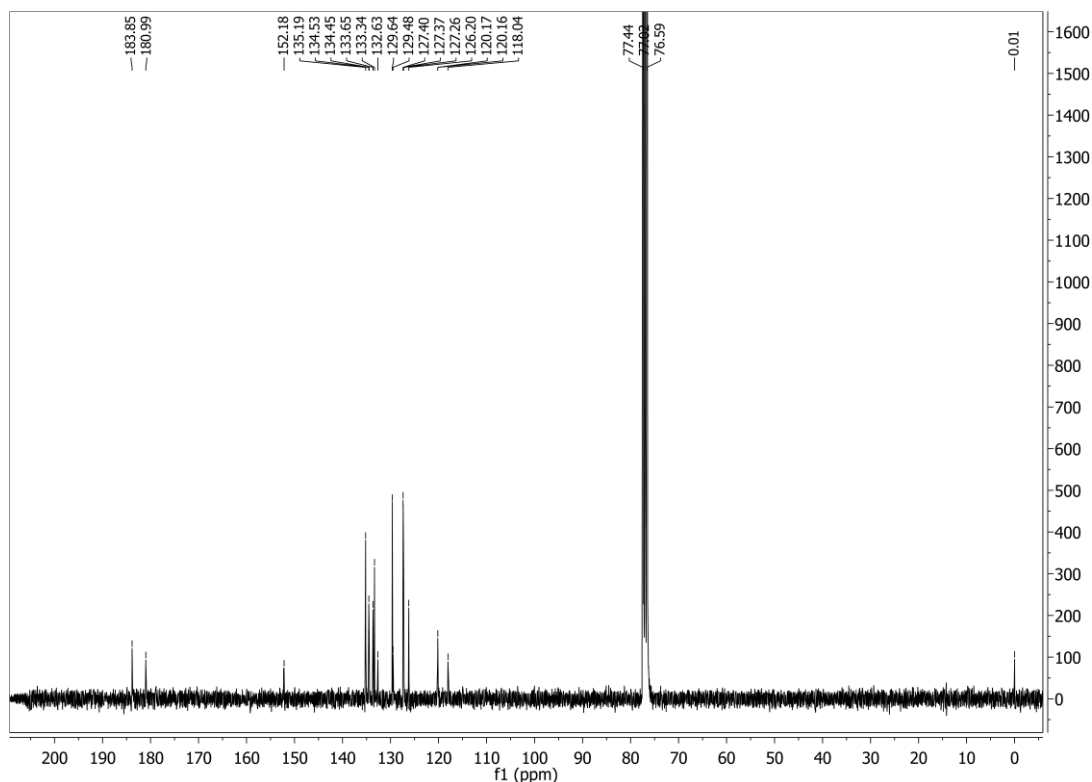Figure E22  $^{13}\text{C}$ -NMR spectrum of **3k** in  $\text{CDCl}_3$ **2-(4-bromostyryl)-3-hydroxynaphthalene-1,4-dione (3l)**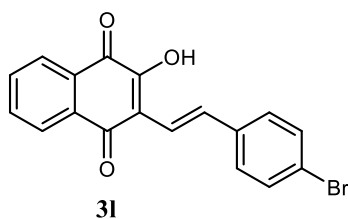

**Purification:** flash chromatography on silica gel ( $\text{CH}_2\text{Cl}_2/\text{MeOH}$  : 500/1)

**Yield:** 70% (74.3 mg)

**Physical appearance:** red solid

**M.p.** 181.3-182.2  $^\circ\text{C}$ ;  $^1\text{H NMR}$  (300 MHz,  $\text{CDCl}_3$ ):  $\delta$  (ppm) 8.22-8.17, 7.86-7.95 (m, 1H), 8.15 (d,  $J = 0.45$  Hz, 1H), 8.12 (d,  $J = 1.4$  Hz, 1H), 7.91 (d,  $J = 16.7$  Hz, 1H), 7.78 (dtd,  $J = 23.4, 7.5, 1.4$  Hz, 4H), 7.56-7.44 (dd,  $J = 2\text{H}$ ), 7.39 (d,  $J = 16.7$  Hz, 1H);  $^{13}\text{C NMR}$  (75 MHz,  $\text{CDCl}_3$ ):  $\delta$  (ppm) 174.61, 171.69, 146.03, 127.62, 125.01, 124.82, 123.02, 122.85, 121.63, 118.32, 116.95, 116.47, 116.23, 115.87, 107.84, 100.43; **HRMS** (ESI $^-$ ): calc. for  $\text{C}_{18}\text{H}_{10}\text{BrO}_3$  [ $\text{M}-\text{H}$ ] $^-$ : 353.9819, found: 353.9804  $m/z$ .

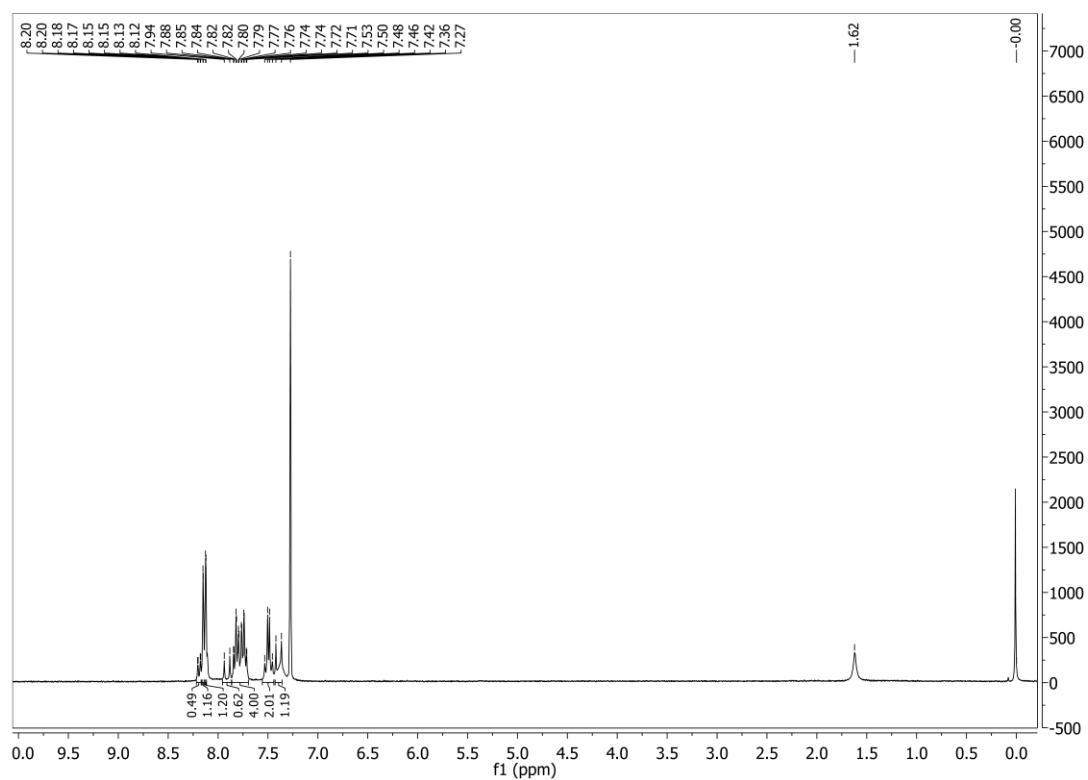Figure E23  $^1\text{H}$ -NMR spectrum of **3l** in  $\text{CDCl}_3$ 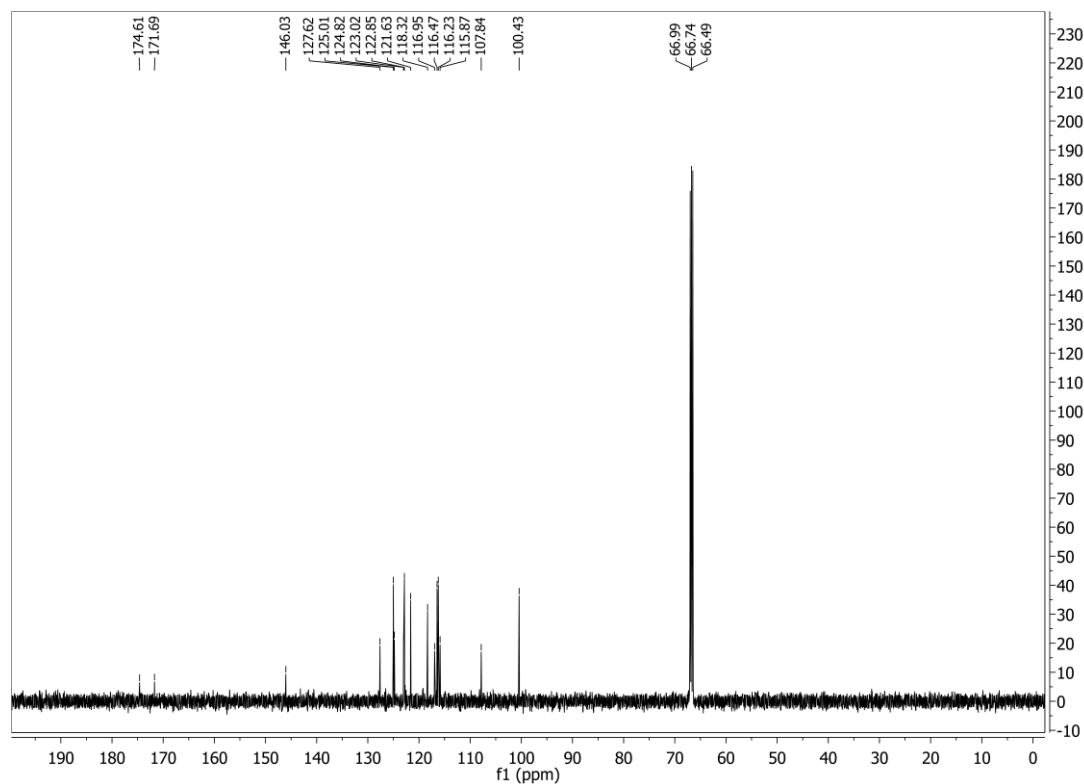Figure E24  $^{13}\text{C}$ -NMR spectrum of **3l** in  $\text{CDCl}_3$ 

**4-(2-(3-hydroxy-1,4-dioxo-1,4-dihydronaphthalen-2-yl)vinyl)benzotrile (3m)**

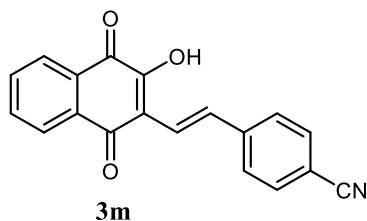

**Purification:** flash chromatography on silica gel (CH<sub>2</sub>Cl<sub>2</sub>/MeOH : 500/1)

**Yield:** 87% (78.6 mg)

**Physical appearance:** red solid

**M.p.** 214.7-218.9 °C; **<sup>1</sup>H NMR** (300 MHz, CDCl<sub>3</sub>): δ (ppm) 8.21 (d, *J* = 7.6 Hz, 1H), 8.14 (d, *J* = 7.7 Hz, 1H), 7.96 (d, *J* = 16.7 Hz, 1H), 7.79 (dt, *J* = 22.9, 7.6 Hz, 2H), 7.68 (s, 4H), 7.51 (d, *J* = 16.7 Hz, 1H); **<sup>13</sup>C NMR** (75 MHz, CDCl<sub>3</sub>): δ (ppm) 183.29, 180.48, 151.98, 141.68, 136.17, 134.85, 132.94, 132.14, 132.00, 128.93, 126.95, 126.80, 125.79, 120.46, 118.43, 117.13, 110.96;

**HRMS** (ESI<sup>-</sup>): calc. for C<sub>19</sub>H<sub>10</sub>NO<sub>3</sub> [M-H]<sup>-</sup>: 300.0666, found: 300.0667 *m/z*.

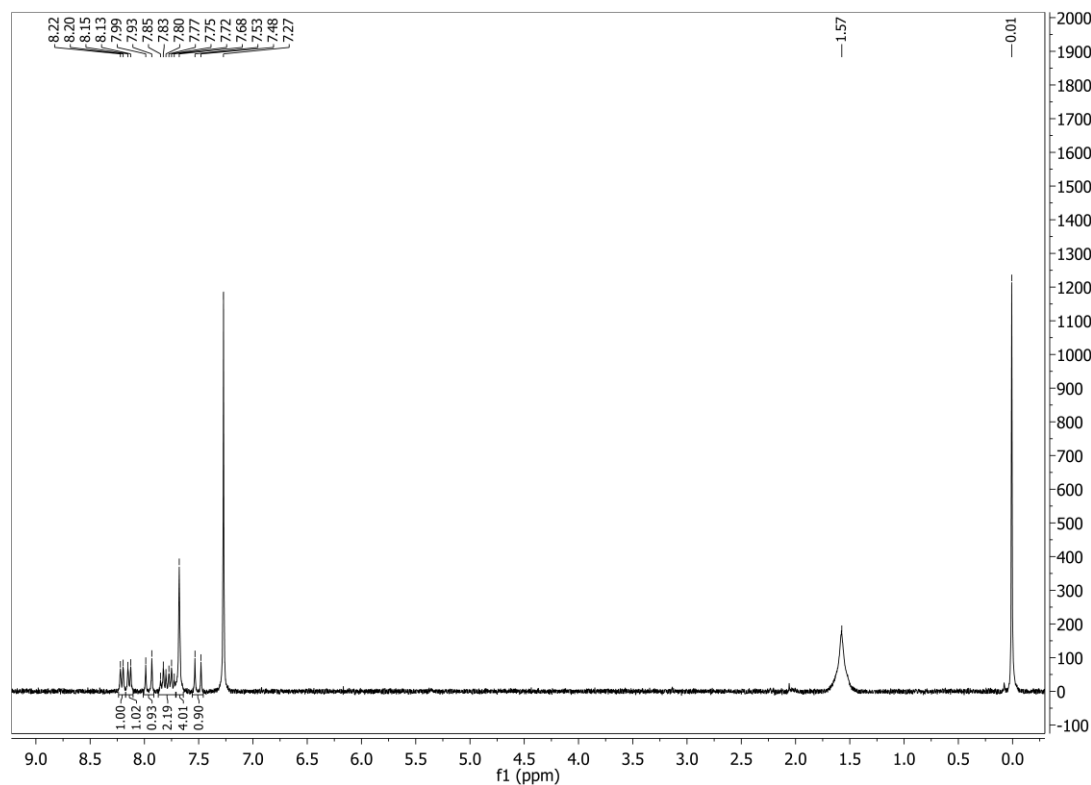

Figure E25 <sup>1</sup>H-NMR spectrum of **3m** in CDCl<sub>3</sub>

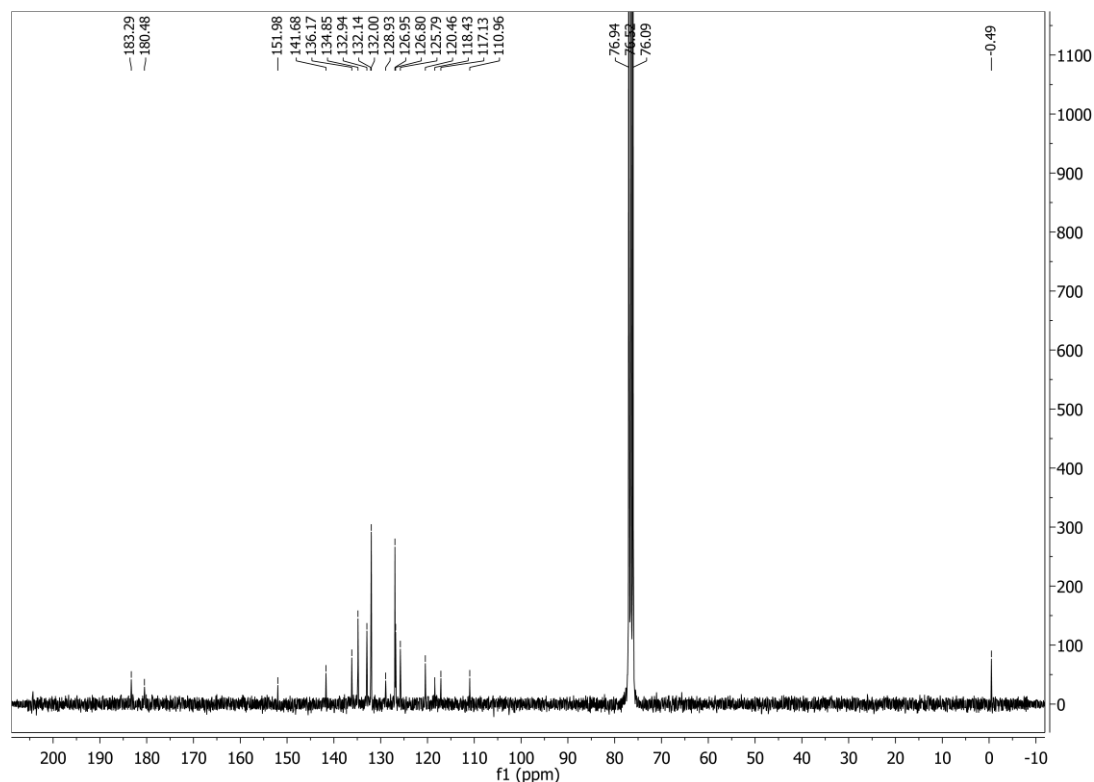Figure E26  $^{13}\text{C}$ -NMR spectrum of **3m** in  $\text{CDCl}_3$ **2-(4-fluoro-2-methylstyryl)-3-hydroxynaphthalene-1,4-dione (3n)**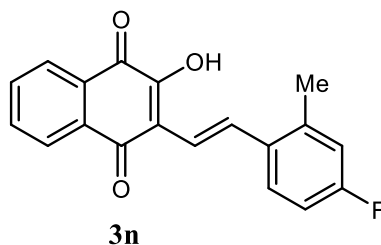

**Purification:** flash chromatography on silica gel ( $\text{CH}_2\text{Cl}_2/\text{MeOH}$  : 500/1)

**Yield:** 77% (71.1 mg)

**Physical appearance:** red solid

**M.p.** 165.7-168.2  $^{\circ}\text{C}$ ;  **$^1\text{H}$  NMR** (300 MHz,  $\text{DMSO}-d_6$ ):  $\delta$  (ppm) 8.05-7.97 (m, 2H), 7.88-7.78 (m, 2H), 7.57 (d,  $J = 7.0$  Hz, 2H), 7.43-7.28 (m, 3H), 6.50 (s, 1H), 1.95 (s, 3H);  **$^{13}\text{C}$  NMR** (75 MHz,  $\text{CDCl}_3$ ):  $\delta$  (ppm) 184.04, 180.95, 150.73, 142.83 ( $^1J_{\text{CF}} = 59.3$  Hz), 134.58 ( $^2J_{\text{CF}} = 1.5$  Hz), 132.61, 132.49 ( $^3J_{\text{CF}} = 1.5$  Hz), 129.07, 127.78, 127.68, 127.47 ( $^4J_{\text{CF}} = 2.3$  Hz), 127.33, 127.05, 126.51, 125.75, 120.33, 115.43 ( $^5J_{\text{CF}} = 7.5$  Hz), 114.60 ( $^6J_{\text{CF}} = 10.9$  Hz) 19.04; **HRMS** (ESI $^-$ ): calc. for  $\text{C}_{19}\text{H}_{12}\text{FO}_3$   $[\text{M}-\text{H}]^-$ : 307.0747, found: 307.0776  $m/z$ .



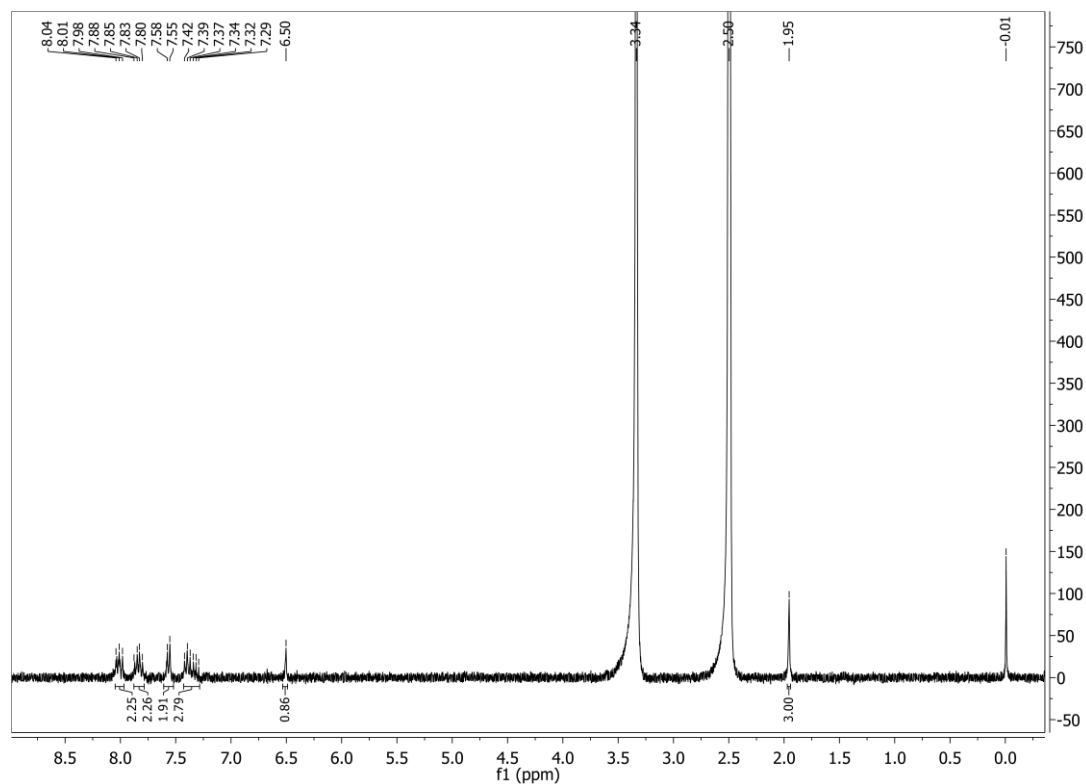Figure E27 <sup>1</sup>H-NMR spectrum of **3n** in CDCl<sub>3</sub>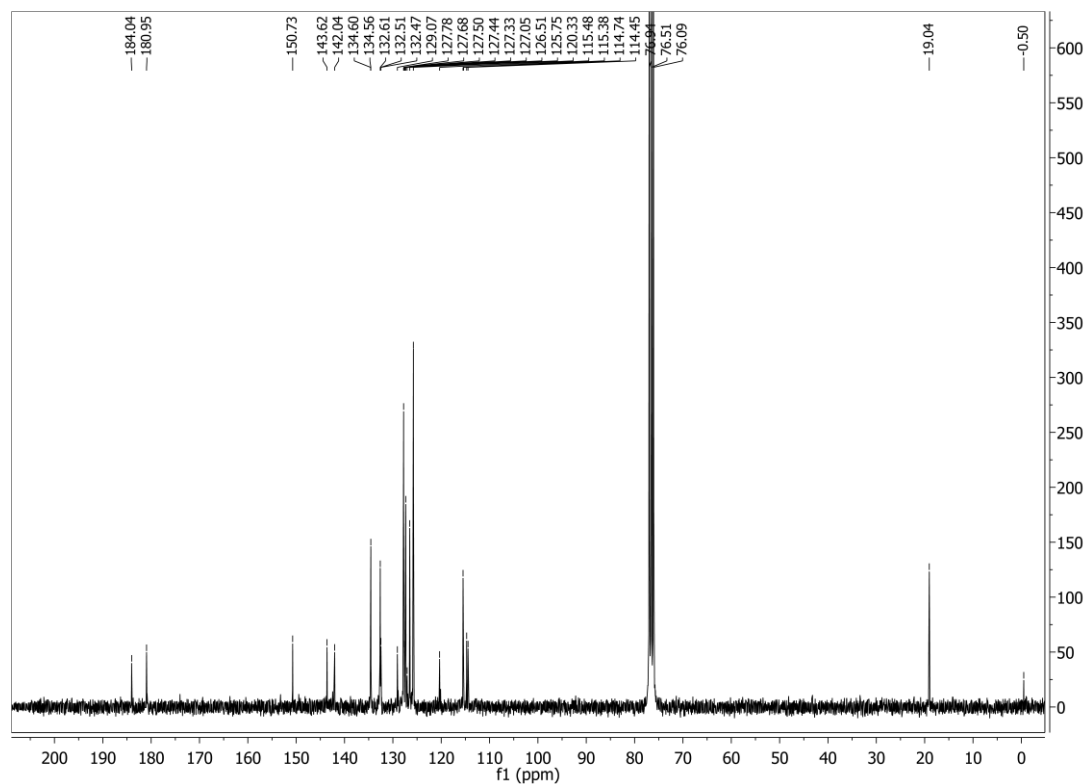Figure E28 <sup>13</sup>C-NMR spectrum of **3n** in CDCl<sub>3</sub>

**2-(2-([1,1'-biphenyl]-4-yl)vinyl)-3-hydroxynaphthalene-1,4-dione (3o)**

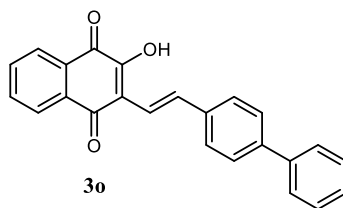

**Purification:** flash chromatography on silica gel (CH<sub>2</sub>Cl<sub>2</sub>/MeOH : 500/1)

**Yield:** 91% (96.1 mg)

**Physical appearance:** dark red solid

**M.p.** 224.2-224.6 °C; **<sup>1</sup>H NMR** (300 MHz, CDCl<sub>3</sub>): δ (ppm) 8.24-8.16 (m, 1H), 8.15-8.09 (m, 1H), 8.03 (d, *J* = 17.1 Hz, 2H), 7.77-7.82 (m, 1H), 7.75-7.71 (m, 1H), 7.70-7.61 (m, 5H), 7.48 (d, *J* = 6.4 Hz, 2H), 7.44 (d, *J* = 2.6 Hz, 1H), 7.37 (t, *J* = 7.3 Hz, 1H); **<sup>13</sup>C NMR** (75 MHz, CDCl<sub>3</sub>): δ (ppm) 183.68, 180.46, 151.16, 140.87, 140.00, 138.36, 136.38, 134.48, 132.72, 132.28, 129.11, 128.32, 127.15, 127.00, 126.88, 126.68, 126.46, 125.57, 118.29, 116.94; **HRMS** (ESI<sup>-</sup>): calc. for C<sub>24</sub>H<sub>15</sub>O<sub>3</sub> [M-H]<sup>-</sup>: 351.1027, found: 351.1025 *m/z*.

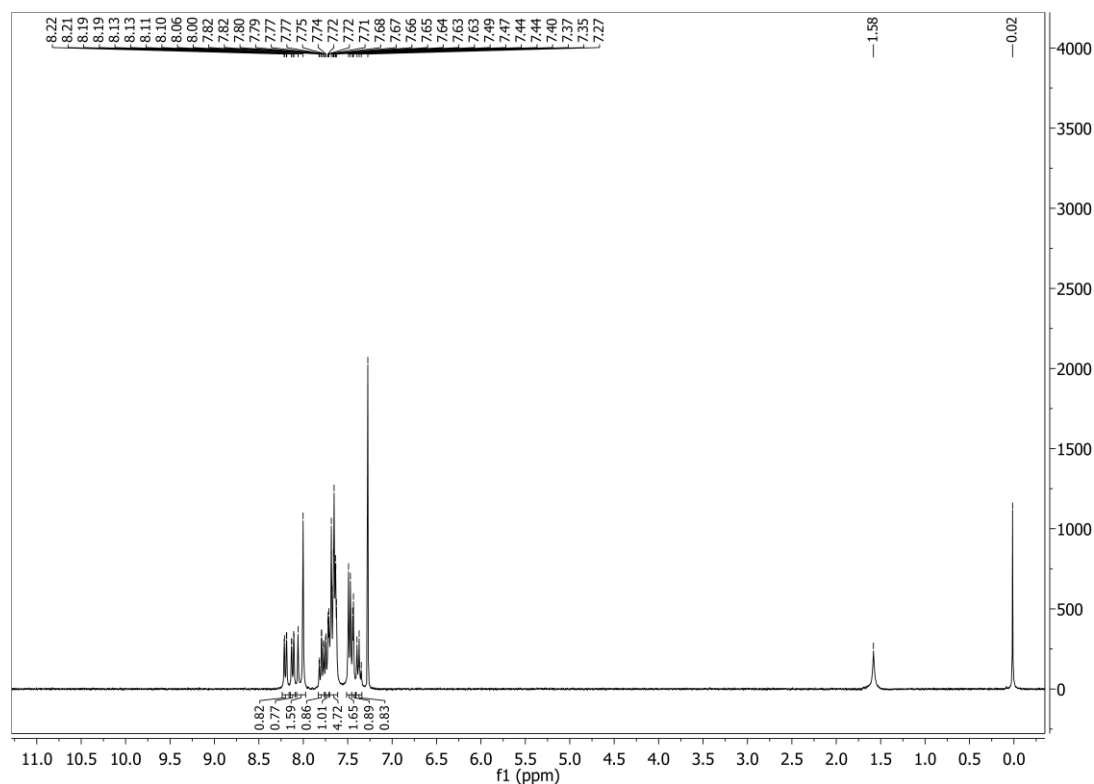

Figure E29 <sup>1</sup>H-NMR spectrum of **3o** in CDCl<sub>3</sub>

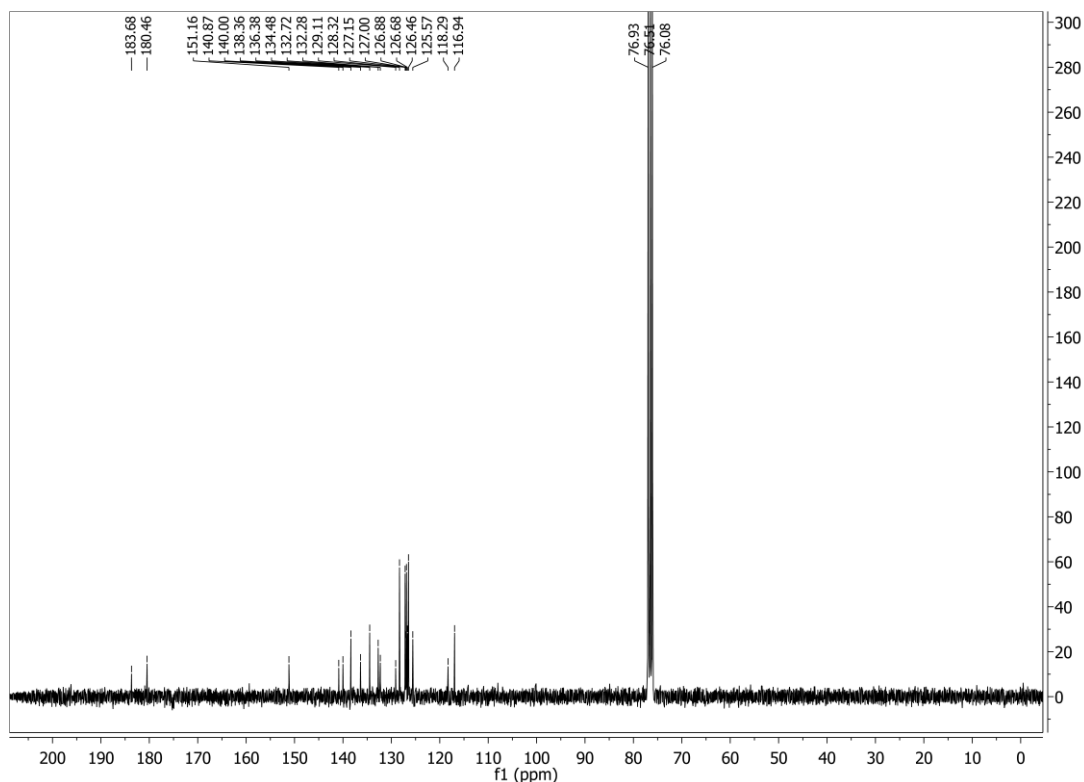Figure E30  $^{13}\text{C}$ -NMR spectrum of **3o** in  $\text{CDCl}_3$ **2-hydroxy-3-(2-(thiophen-2-yl)vinyl)naphthalene-1,4-dione (3p)**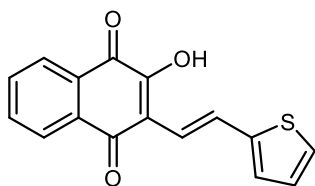**3p****Purification:** flash chromatography on silica gel ( $\text{CH}_2\text{Cl}_2/\text{MeOH}$  : 500/1)**Yield:** 46% (38.8 mg)**Physical appearance:** red solid**M.p.** 196.5-199.2 °C;  $^1\text{H}$  NMR (300 MHz,  $\text{CDCl}_3$ ):  $\delta$  (ppm) 8.11 (d,  $J$  = 8.5 Hz, 2H), 7.96 (d,  $J$  = 8.0 Hz, 1H), 7.85-7.68 (m, 2H), 7.55 (t,  $J$  = 7.6 Hz, 1H), 7.31 (d,  $J$  = 5.0 Hz, 1H), 7.07-7.03 (m, 1H), 6.90 (d,  $J$  = 3.4 Hz, 1H);  $^{13}\text{C}$  NMR (75 MHz,  $\text{CDCl}_3$ ):  $\delta$  (ppm) 183.29, 180.55, 151.45, 139.69, 134.93, 133.25, 132.36, 129.72, 128.05, 127.93, 127.18, 126.55, 126.24, 126.08, 122.84, 116.91; **HRMS** (ESI): calc. for  $\text{C}_{16}\text{H}_{19}\text{O}_3\text{S}$  [ $\text{M}-\text{H}$ ] $^-$ : 281.0278, found: 281.0250  $m/z$ .

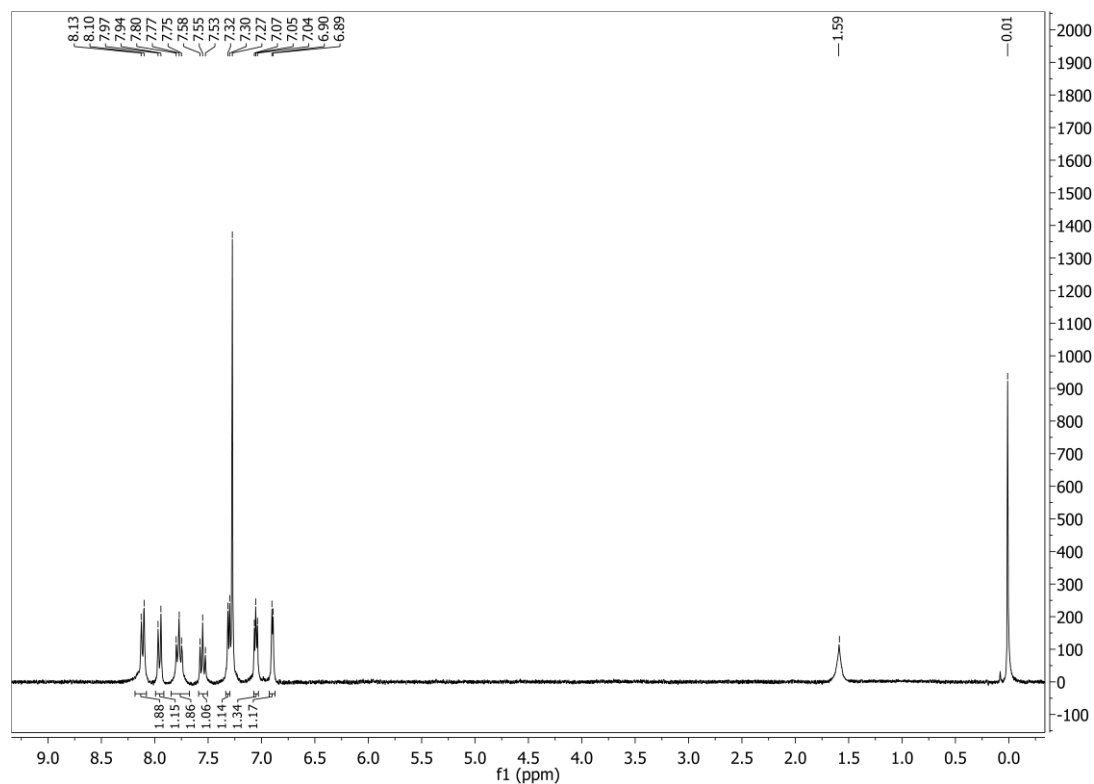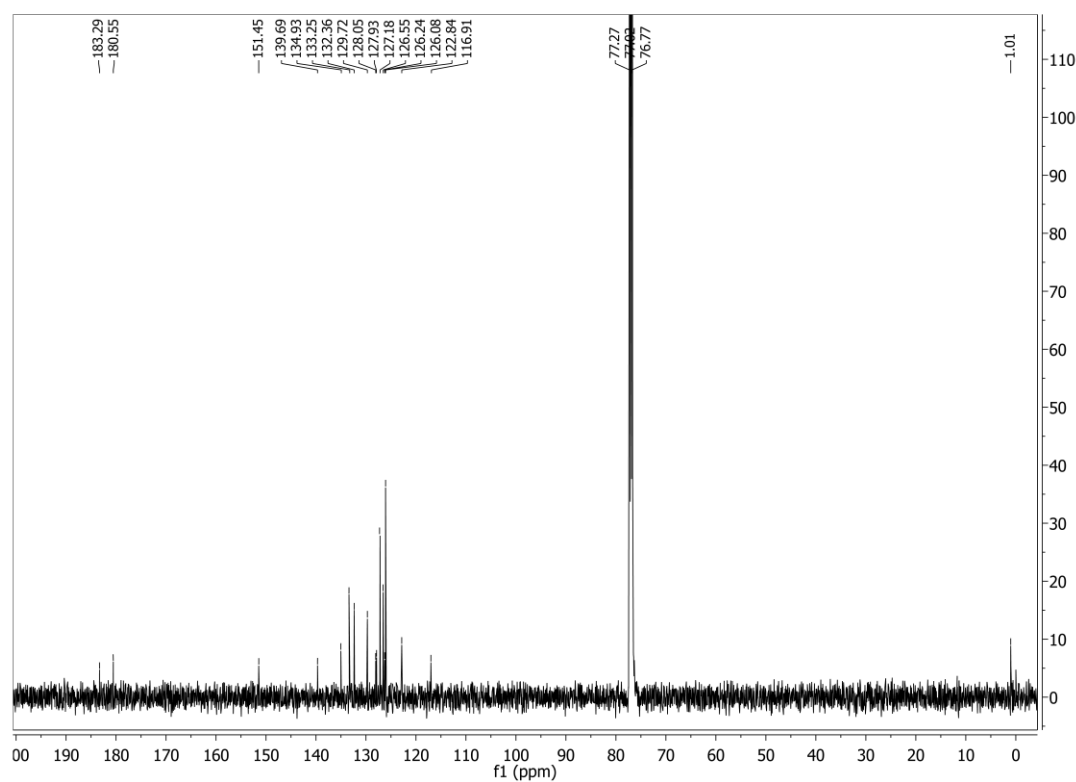**2-hydroxy-3-(2-(naphthalen-2-yl)vinyl)naphthalene-1,4-dione (3q)**

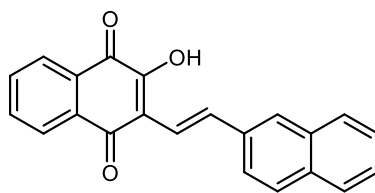**3q**

**Purification:** flash chromatography on silica gel (CH<sub>2</sub>Cl<sub>2</sub>/MeOH : 500/1)

**Yield:** 88% (86.0 mg)

**Physical appearance:** red solid

**M.p.** 195.6-197.9 °C; **<sup>1</sup>H NMR** (300 MHz, DMSO-*d*<sub>6</sub>): δ (ppm) 8.07 (d, *J* = 1.9 Hz, 1H), 8.06-7.99 (m, 3H), 7.99-7.86 (m, 4H), 7.85-7.79 (m, 2H), 7.567.44 (m, 3H); **<sup>13</sup>C NMR** (75 MHz, CDCl<sub>3</sub>): δ (ppm) 184.21, 180.97, 151.67, 139.39, 135.34, 135.00, 133.57, 133.26, 132.74, 129.60, 128.41, 128.36, 128.17, 128.06, 127.73, 127.20, 126.44, 126.09, 125.11, 123.48, 118.79, 117.73;

**HRMS** (ESI<sup>-</sup>): calc. for C<sub>22</sub>H<sub>13</sub>O<sub>3</sub> [M-H]<sup>-</sup>: 325.0870, found: 325.0868 *m/z*.

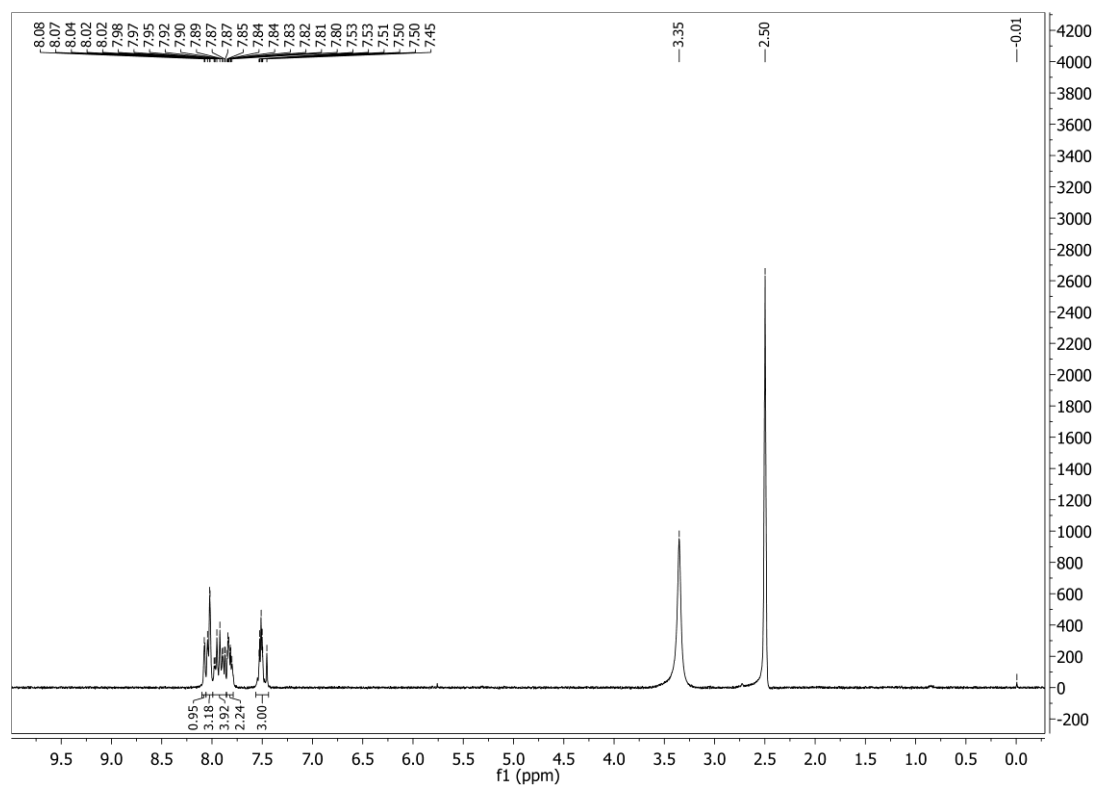

Figure E33 <sup>1</sup>H-NMR spectrum of **3q** in CDCl<sub>3</sub>

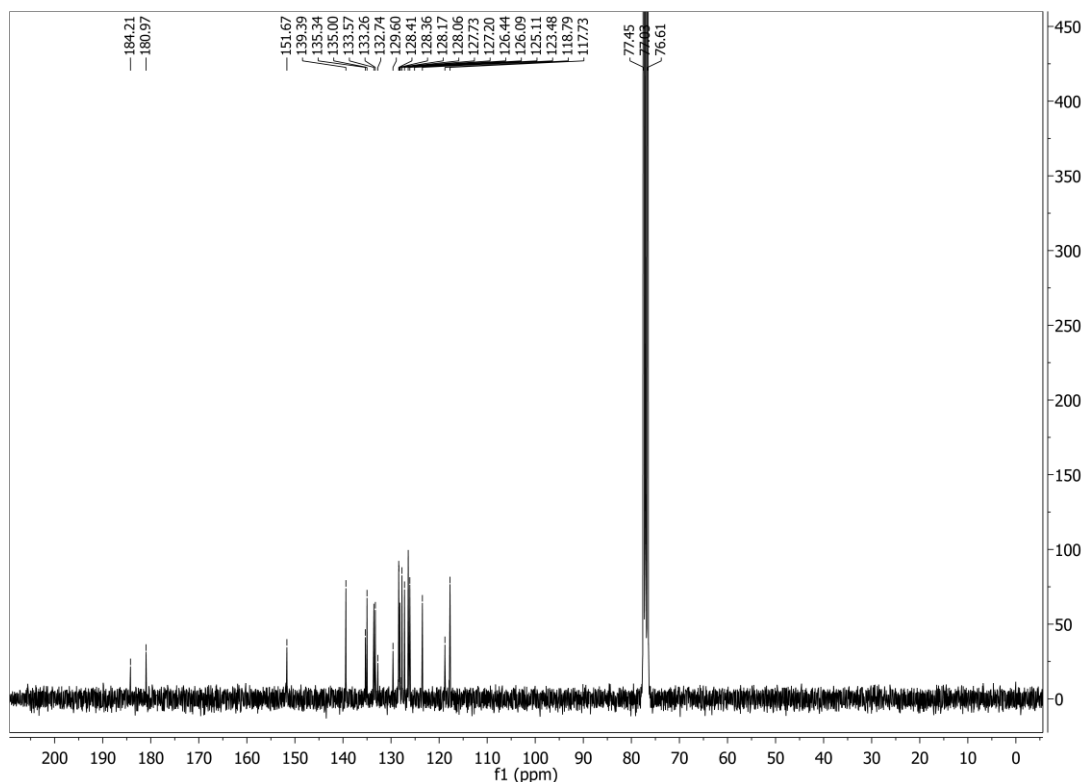Figure E34  $^{13}\text{C}$ -NMR spectrum of **3q** in  $\text{CDCl}_3$ **2-(2-(anthracen-9-yl)vinyl)-3-hydroxynaphthalene-1,4-dione (3r)**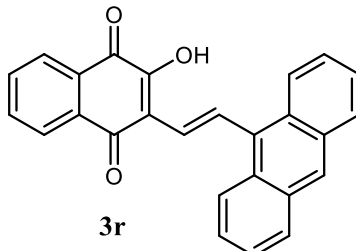

**Purification:** flash chromatography on silica gel ( $\text{CH}_2\text{Cl}_2/\text{MeOH}$  : 500/1)

**Yield:** 67% (75.6 mg)

**Physical appearance:** dark red solid

**M.p.** 219.7-221.6  $^{\circ}\text{C}$ ;  $^1\text{H}$  NMR (300 MHz,  $\text{CDCl}_3$ ):  $\delta$  (ppm) 8.80 (d,  $J = 16.9$  Hz, 1H), 8.41 (d,  $J = 6.0$  Hz, 2H), 8.21 (d,  $J = 7.6$  Hz, 1H), 8.15 (d,  $J = 7.5$  Hz, 1H), 8.04-7.97 (m, 2H), 7.86-7.68 (m, 2H), 7.54-7.43 (m, 4H), 7.29-7.20 (m, 2H);  $^{13}\text{C}$  NMR (75 MHz,  $\text{CDCl}_3$ ):  $\delta$  (ppm) 183.81, 180.91, 151.59, 137.16, 136.16, 134.74, 132.85, 132.40, 131.08, 129.83, 129.14, 128.95, 128.29, 126.80, 126.71, 125.74, 125.55, 125.37, 124.82, 118.02; **HRMS** (ESI $^-$ ): calc. for  $\text{C}_{26}\text{H}_{15}\text{O}_3$  [ $\text{M}-\text{H}$ ] $^-$ : 375.1027, found: 375.1029  $m/z$ .

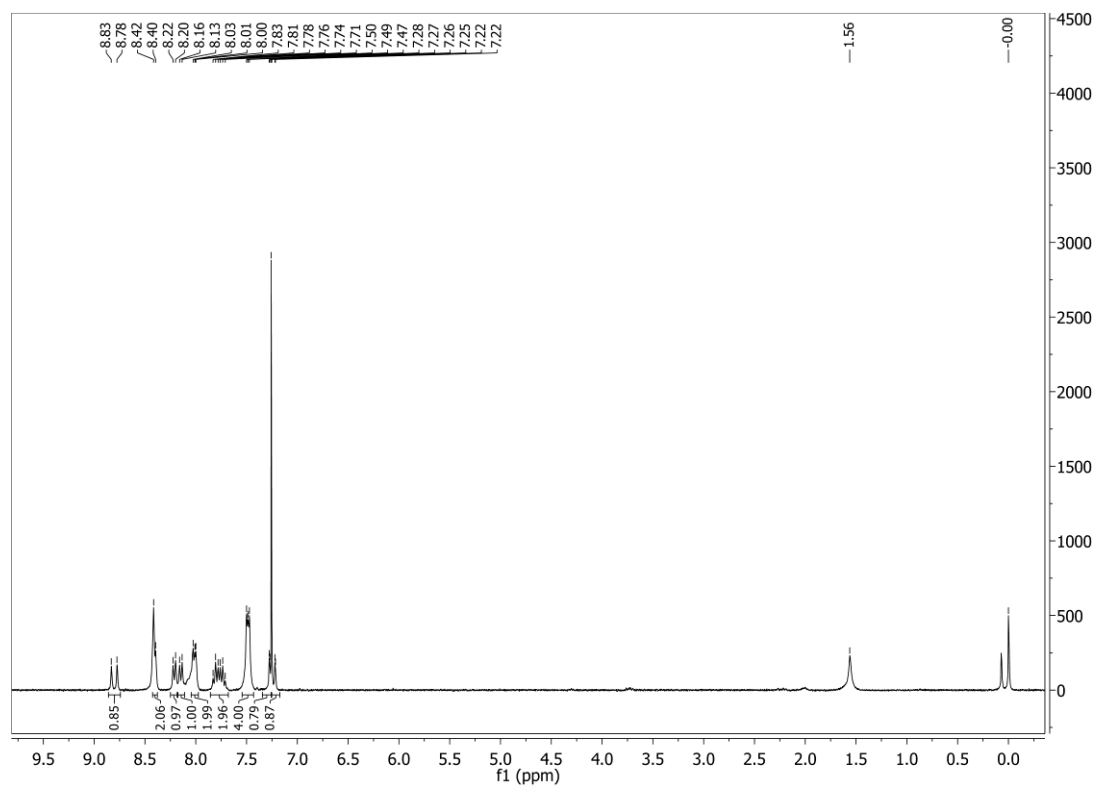Figure E35  $^1\text{H}$ -NMR spectrum of **3r** in  $\text{CDCl}_3$ 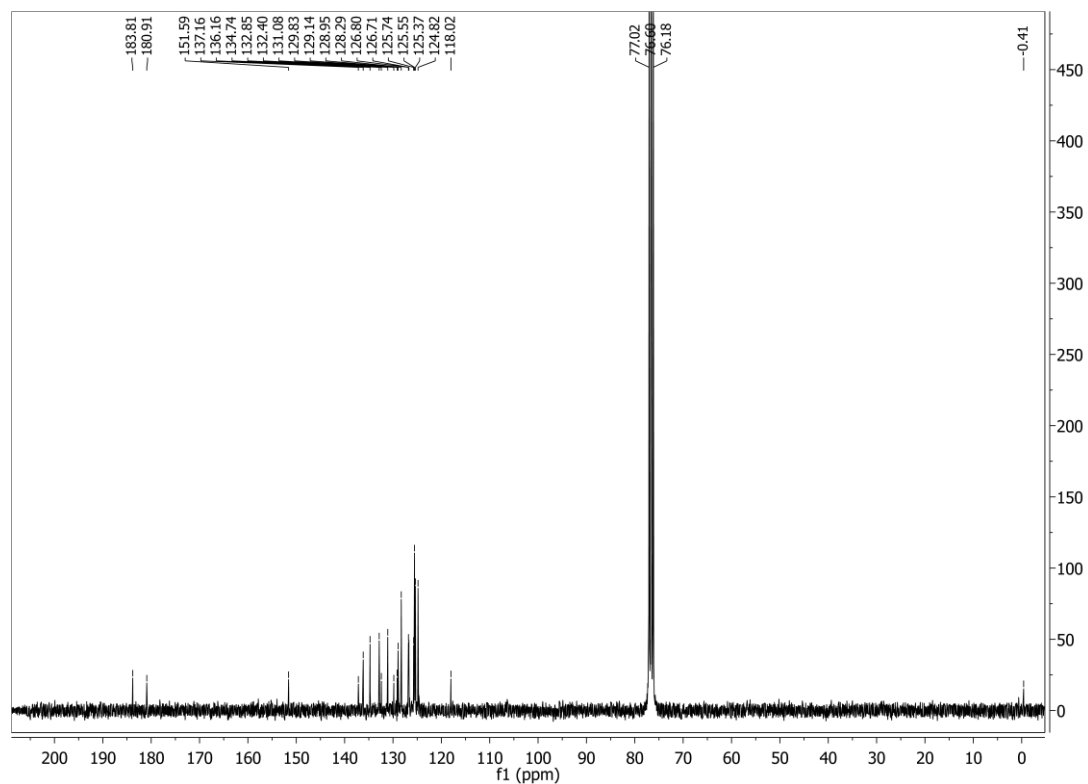Figure E36  $^{13}\text{C}$ -NMR spectrum of **3r** in  $\text{CDCl}_3$ **2-(2,2-diphenylvinyl)-3-hydroxynaphthalene-1,4-dione (3s)**

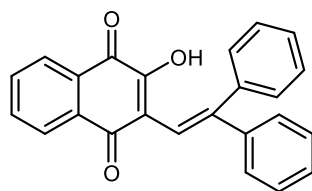**3s**

**Purification:** flash chromatography on silica gel (CH<sub>2</sub>Cl<sub>2</sub>/MeOH : 500/1)

**Yield:** 48% (49.6 mg)

**Physical appearance:** red solid

**M.p.** 201.6-202.3 °C; **<sup>1</sup>H NMR** (300 MHz, CDCl<sub>3</sub>): δ (ppm) 8.04 (dt, *J* = 7.4, 1.4 Hz, 2H), 7.70 (dtd, *J* = 18.8, 7.4, 1.5 Hz, 2H), 7.39 – 7.31 (m, 5H), 7.25 – 7.18 (m, 5H), 6.75 (s, 1H); **<sup>13</sup>C NMR** (75 MHz, CDCl<sub>3</sub>): δ (ppm) 183.44, 180.51, 151.07, 149.64, 141.99, 140.71, 134.73, 134.41, 132.65, 132.50, 129.03, 128.09, 127.76, 127.59, 127.50, 127.25, 126.43, 125.56, 120.63, 116.20;

**HRMS** (ESI<sup>-</sup>): calc. for C<sub>24</sub>H<sub>15</sub>O<sub>3</sub> [M-H]<sup>-</sup>: 351.1027, found: 351.1019 *m/z*.

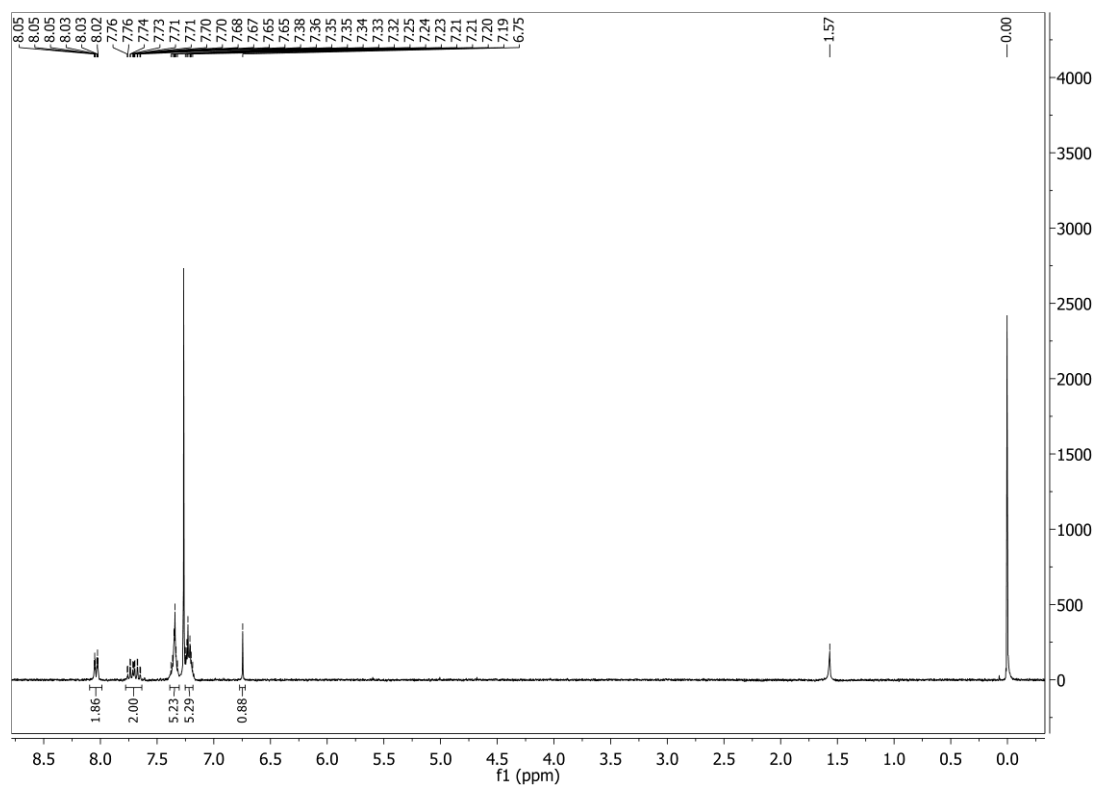

Figure E37 <sup>1</sup>H-NMR spectrum of **3s** in CDCl<sub>3</sub>



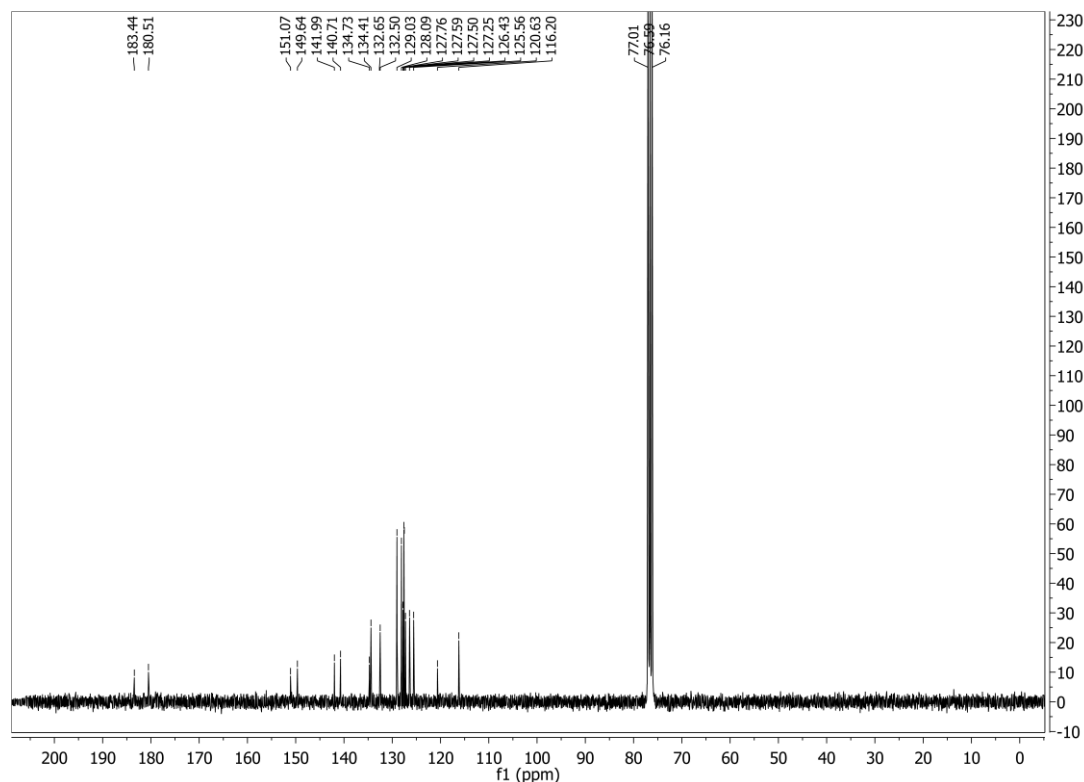Figure E38  $^{13}\text{C}$ -NMR spectrum of **3s** in  $\text{CDCl}_3$ **2-hydroxy-3-(2-phenylprop-1-en-1-yl)naphthalene-1,4-dione (3t)**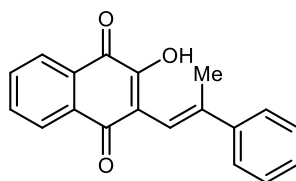**3t****Purification:** flash chromatography on silica gel ( $\text{CH}_2\text{Cl}_2/\text{MeOH}$  : 500/1)**Yield:** 50% (43.5 mg)**Physical appearance:** red solid

**M.p.** 141.2-143.6 °C;  $^1\text{H NMR}$  (300 MHz,  $\text{CDCl}_3$ ):  $\delta$  (ppm) 8.22-8.10 (m, 2H), 7.82-7.71 (m, 2H), 7.60 (d,  $J = 7.9$  Hz, 2H), 7.36 (dt,  $J = 12.5, 6.6$  Hz, 3H), 6.64 (s, 1H), 2.10 (s, 3H);  $^{13}\text{C NMR}$  (75 MHz,  $\text{CDCl}_3$ ):  $\delta$  (ppm) 184.03, 180.96, 150.78, 143.60, 142.09, 134.51, 132.56, 132.42, 129.10, 127.76, 127.30, 126.50, 125.75, 125.68, 120.35, 115.51, 19.02; **HRMS** (ESI $^-$ ): calc. for  $\text{C}_{19}\text{H}_{13}\text{O}_3$  [ $\text{M}-\text{H}$ ] $^-$ : 289.0870, found: 289.0857  $m/z$ .

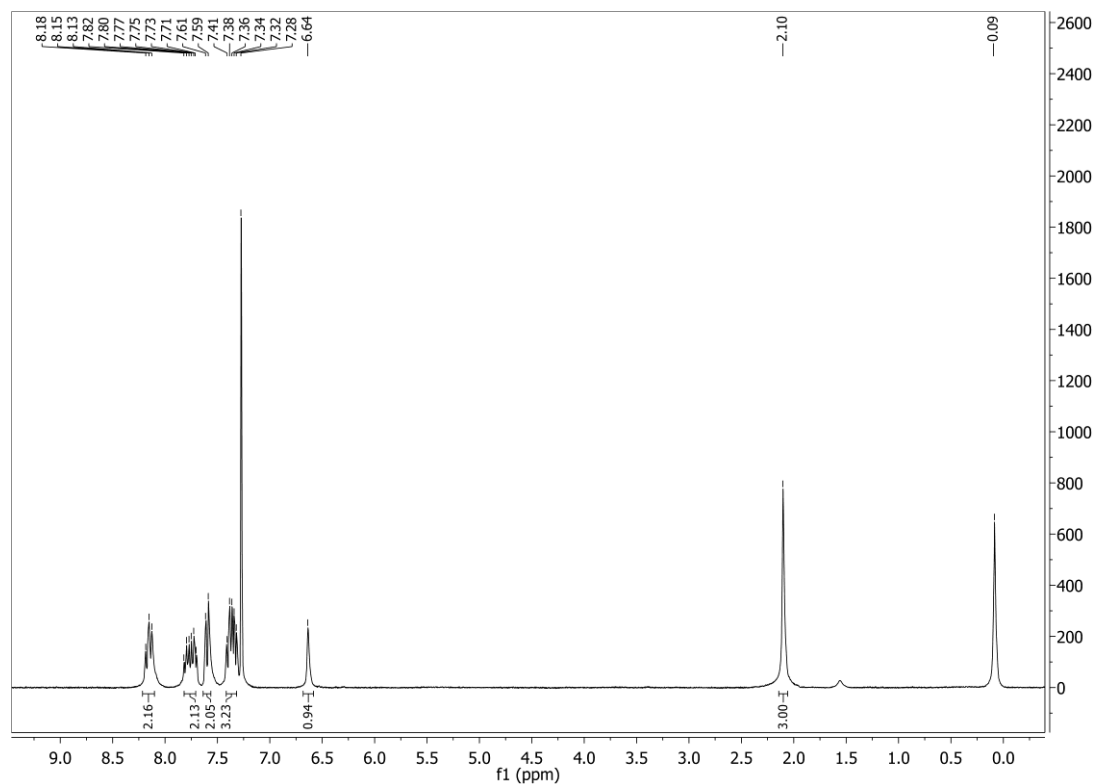Figure E39  $^1\text{H}$ -NMR spectrum of **3t** in  $\text{CDCl}_3$ 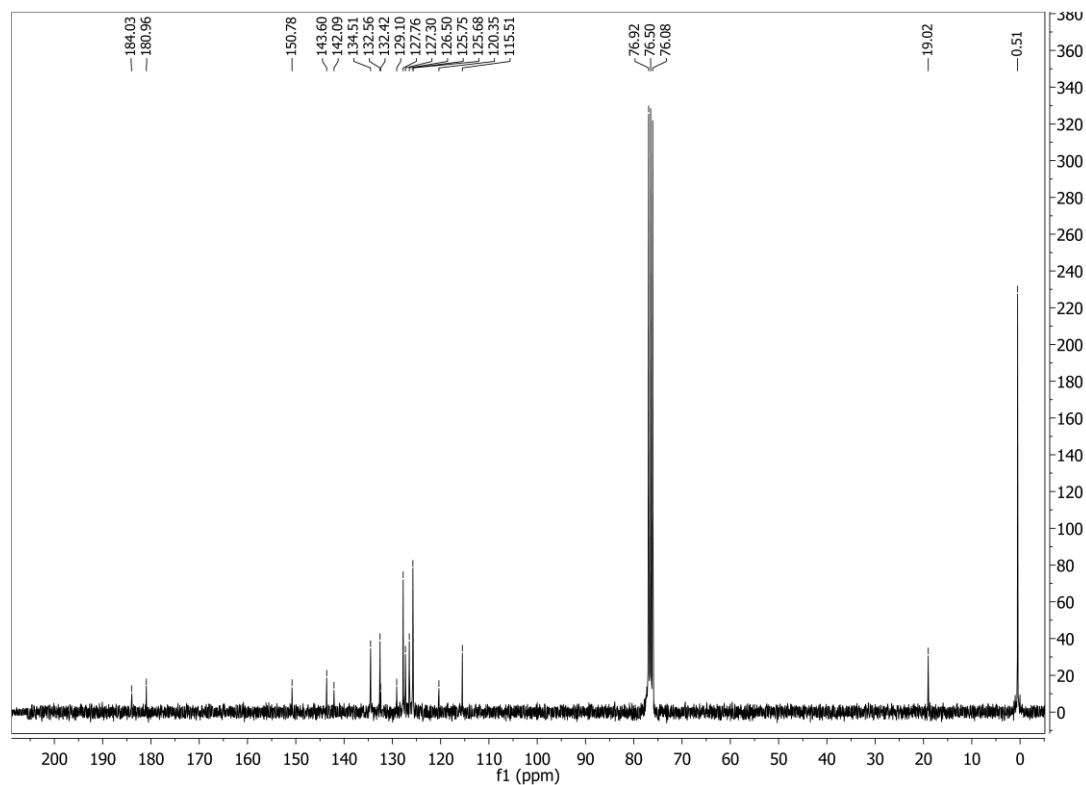Figure E40  $^{13}\text{C}$ -NMR spectrum of **3t** in  $\text{CDCl}_3$ **2-(2-bromo-2-phenylvinyl)-3-hydroxynaphthalene-1,4-dione (3u)**

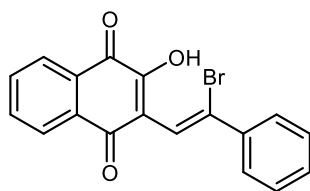**3u**

**Purification:** flash chromatography on silica gel (CH<sub>2</sub>Cl<sub>2</sub>/MeOH : 500/1)

**Yield:** 51% (54.2 mg)

**Physical appearance:** red solid

**M.p.** 220.5-222.1 °C; **<sup>1</sup>H NMR** (300 MHz, CDCl<sub>3</sub>): δ (ppm) 8.09-8.01 (m, 1H), 7.80-7.74 (m, 1H), 7.74-7.68 (m, 2H), 7.67-7.61 (m, 1H), 7.50-7.43 (m, 2H), 7.43-7.34 (m, 2H), 6.99 (s, 1H); **<sup>13</sup>C NMR** (75 MHz, CDCl<sub>3</sub>): δ (ppm) 179.79, 173.86, 159.15, 156.21, 134.91, 130.06, 129.67, 128.71, 128.50, 128.37, 128.12, 127.89, 123.88, 122.80, 121.68, 102.29; **HRMS** (ESI): calc. for C<sub>18</sub>H<sub>10</sub>BrO<sub>3</sub> [M-H]<sup>-</sup>: 353.9819, found: 353.9804 *m/z*.

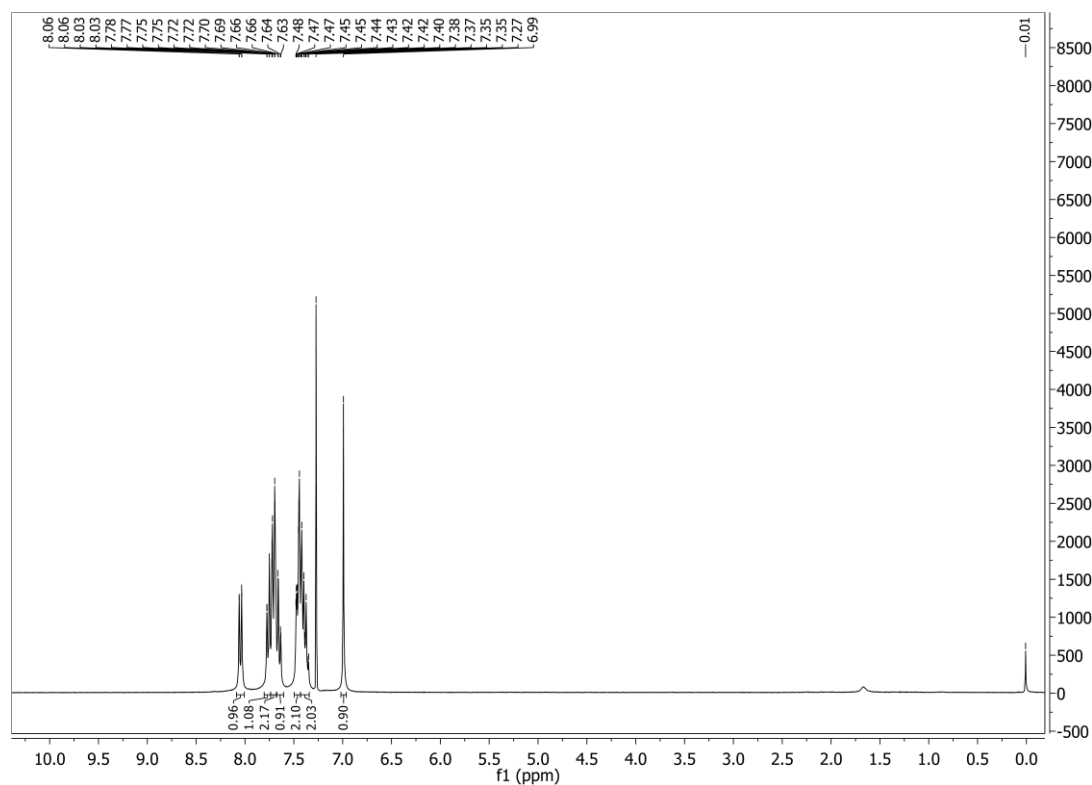

Figure E41 <sup>1</sup>H-NMR spectrum of **3u** in CDCl<sub>3</sub>

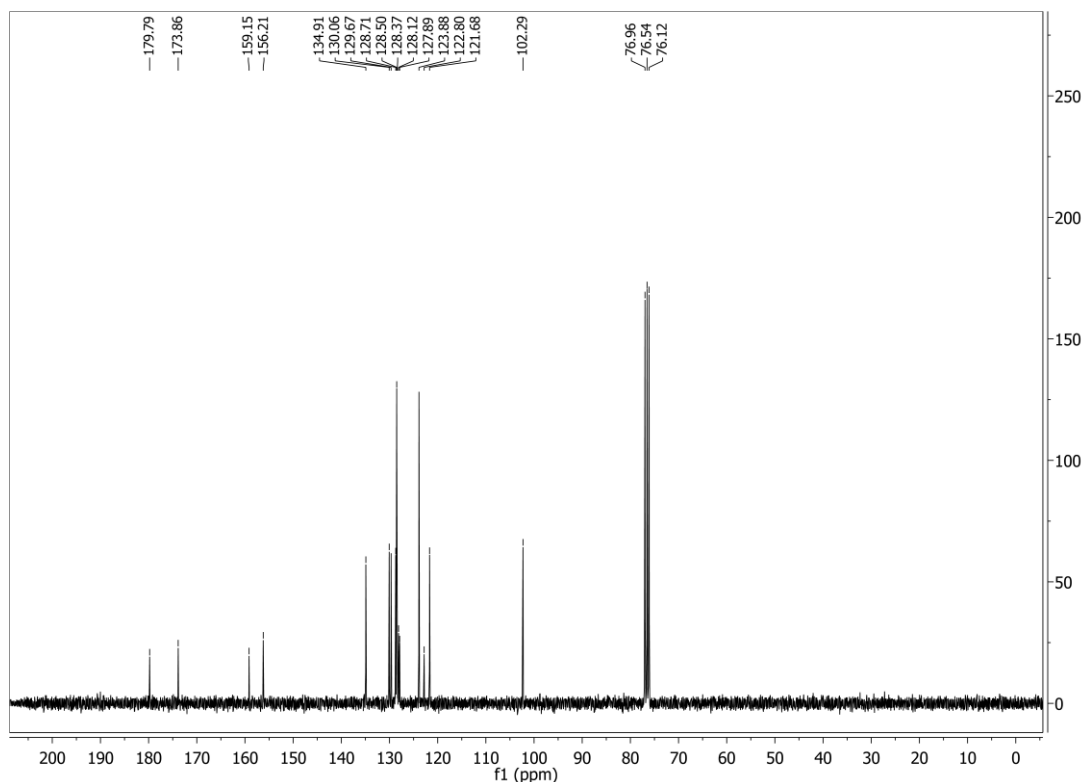Figure E42  $^{13}\text{C}$ -NMR spectrum of **3u** in  $\text{CDCl}_3$ **3-hydroxy-6-methyl-2-styrylnaphthalene-1,4-dione (3v)**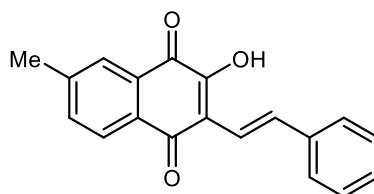**3v****Purification:** flash chromatography on silica gel ( $\text{CH}_2\text{Cl}_2/\text{MeOH}$  : 500/1)**Yield:** 86% (74.8 mg)**Physical appearance:** red solid

**M.p.** 192.3-194.1 °C;  $^1\text{H}$  NMR (300 MHz,  $\text{CDCl}_3$ ):  $\delta$  (ppm) 8.06 (d,  $J = 7.9$  Hz, 1H), 7.97 (d,  $J = 9.8$  Hz, 1H), 7.91 (d,  $J = 13.7$  Hz, 1H), 7.60 (d,  $J = 7.4$  Hz, 2H), 7.56 (d,  $J = 8.4$  Hz, 1H), 7.42 (d,  $J = 3.5$  Hz, 1H), 7.38 (d,  $J = 6.1$  Hz, 2H), 7.32 (d,  $J = 7.2$  Hz, 1H), 2.49 (s, 3H);  $^{13}\text{C}$  NMR (75 MHz,  $\text{CDCl}_3$ ):  $\delta$  (ppm) 183.60, 180.75, 151.10, 143.74, 138.65, 137.37, 135.13, 129.96, 128.96, 128.20, 128.09, 126.82, 126.66, 125.94, 117.99, 117.02, 21.13; **HRMS** (ESI): calc. for  $\text{C}_{19}\text{H}_{13}\text{O}_3$   $[\text{M}-\text{H}]^-$ : 289.0870, found: 289.0864  $m/z$ .

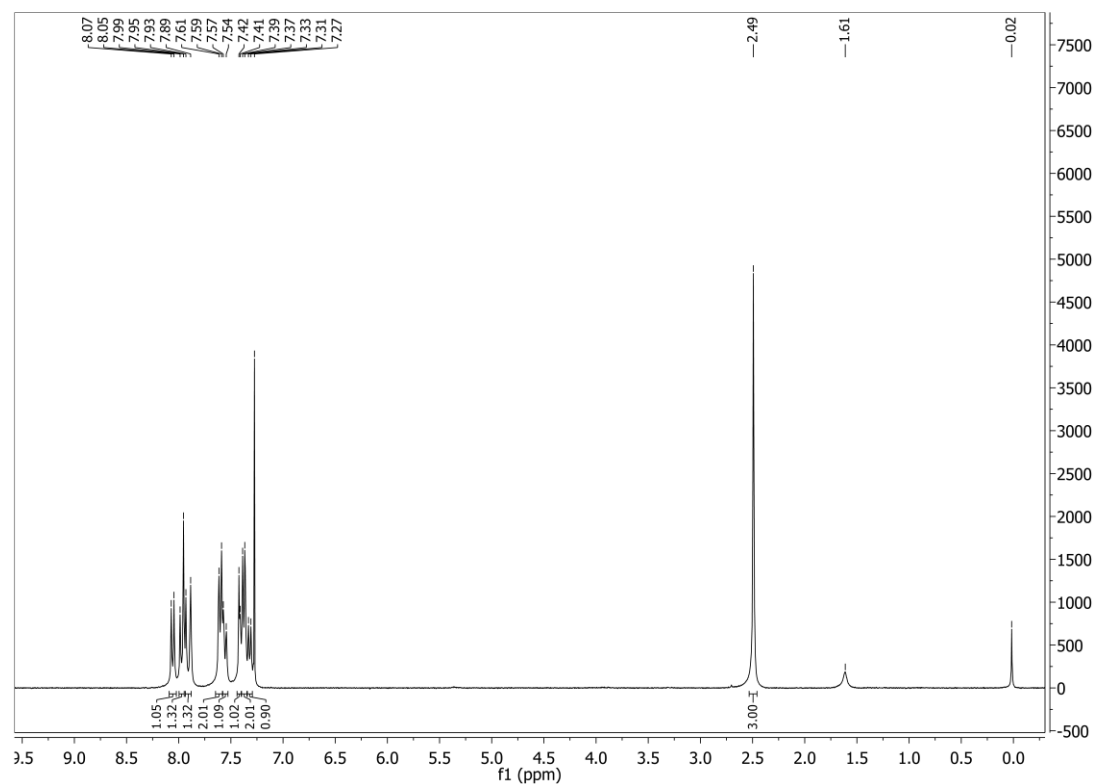Figure E43 <sup>1</sup>H-NMR spectrum of **3v** in CDCl<sub>3</sub>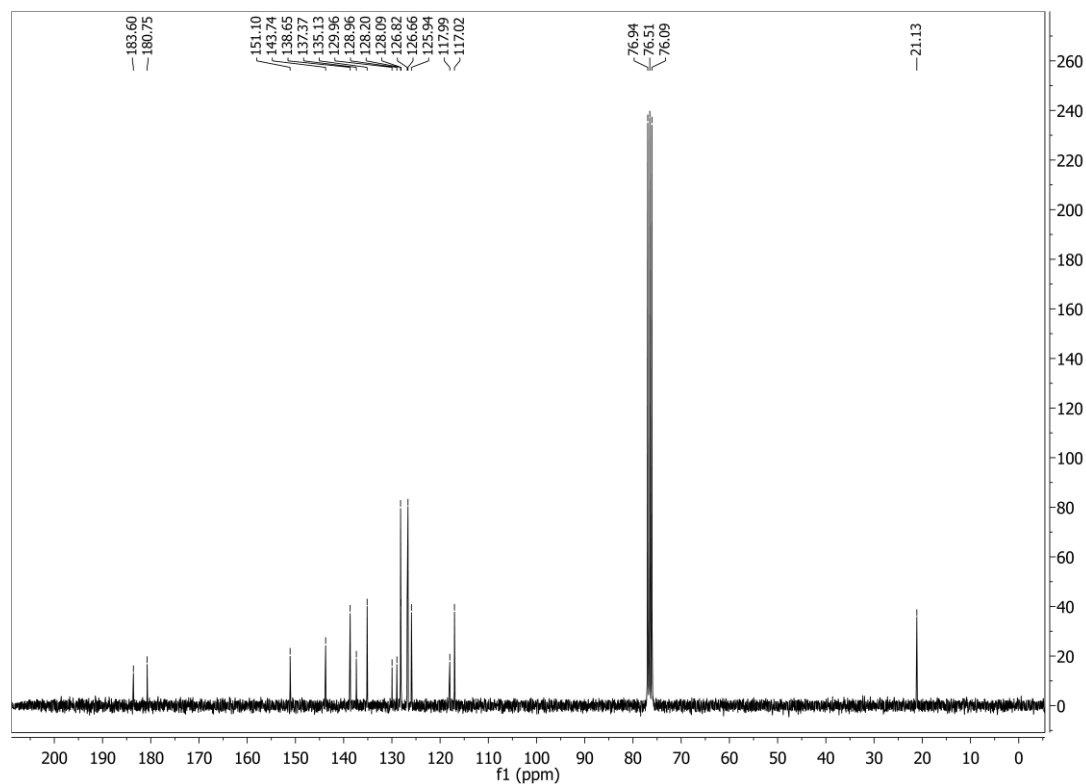Figure E44 <sup>13</sup>C-NMR spectrum of **3v** in CDCl<sub>3</sub>**2-(4-chlorostyryl)-3-hydroxy-6-methylnaphthalene-1,4-dione (**3w**)**

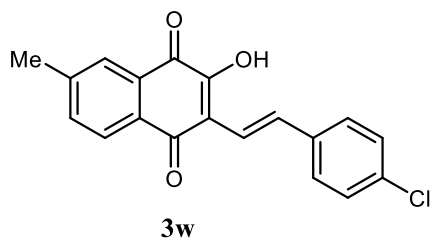

**Purification:** flash chromatography on silica gel (CH<sub>2</sub>Cl<sub>2</sub>/MeOH : 500/1)

**Yield:** 84% (81.6mg)

**Physical appearance:** red solid

**M.p.** 234.5-235.6 °C; **<sup>1</sup>H NMR** (300 MHz, CDCl<sub>3</sub>): δ (ppm) 8.08 (d, *J* = 8.0 Hz, 1H), 7.97 (s, 1H), 7.96-7.88 (m, 2H), 7.58 (d, *J* = 8.6 Hz, 1H), 7.54 (d, *J* = 8.7 Hz, 2H), 7.41-7.32 (m, 3H), 2.51 (s, 3H; <sup>13</sup>C NMR (75 MHz, CDCl<sub>3</sub>): δ (ppm) 181.08, 178.41, 151.85, 141.40, 134.89, 133.26, 132.35, 130.98, 128.12, 128.04, 126.22, 125.63, 124.11, 123.29, 116.64, 115.39, 18.11; **HRMS** (ESI): calc. for C<sub>19</sub>H<sub>12</sub>ClO<sub>3</sub> [M-H]<sup>-</sup>: 323.0480, found: 323.0475 *m/z*.

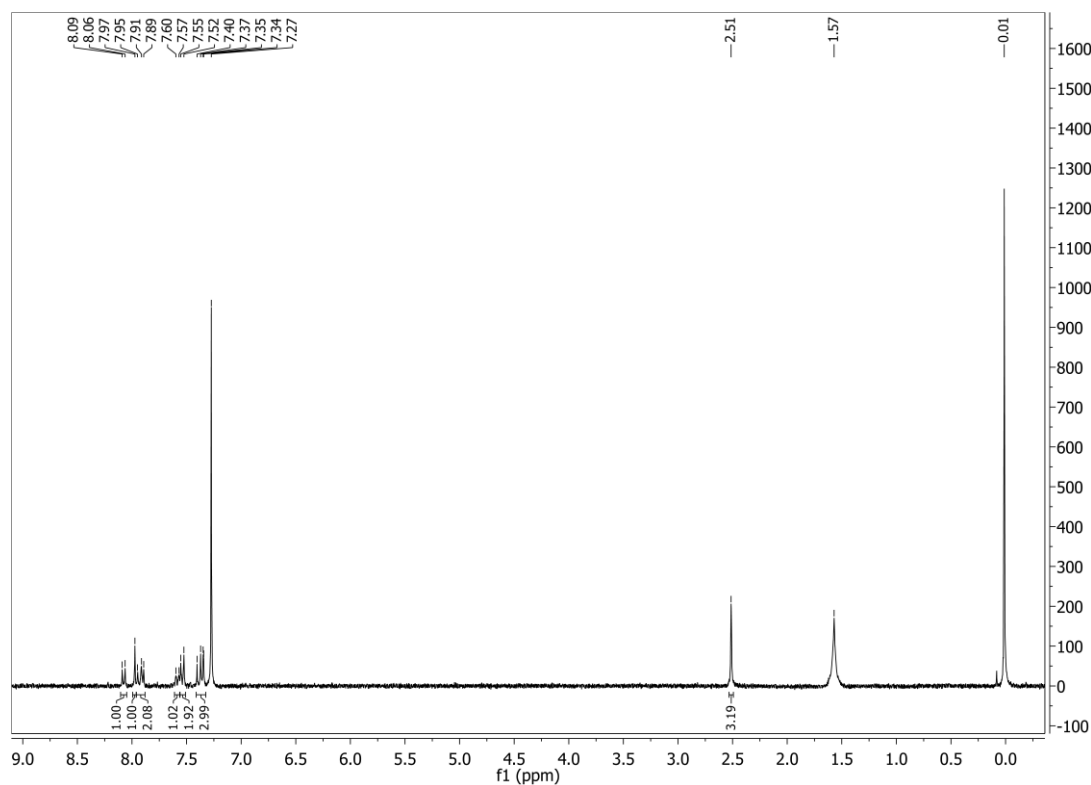

Figure E45 <sup>1</sup>H-NMR spectrum of **3w** in CDCl<sub>3</sub>

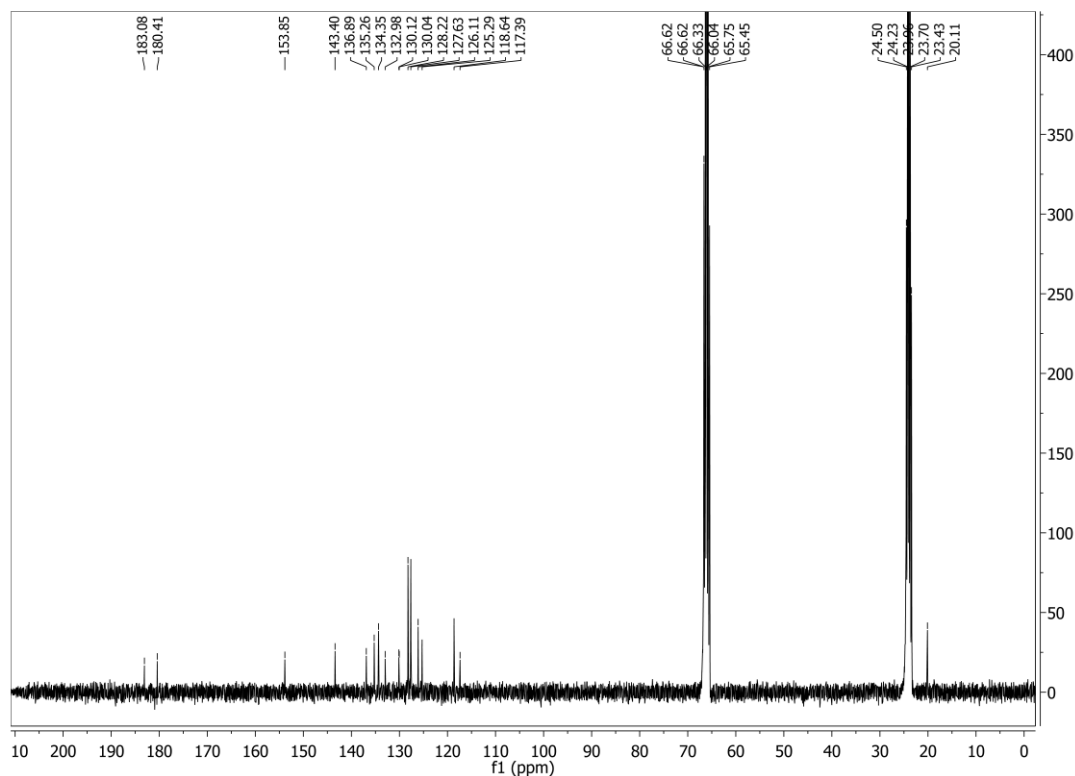Figure E46  $^{13}\text{C}$ -NMR spectrum of **3w** in THF**2-(4-bromostyryl)-3-hydroxy-6-methylnaphthalene-1,4-dione (3x)**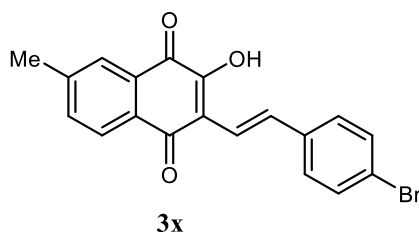

**Purification:** flash chromatography on silica gel ( $\text{CH}_2\text{Cl}_2/\text{MeOH}$  : 500/1)

**Yield:** 83% (91.6 mg)

**Physical appearance:** red solid

**M.p.** 238.4-240.3 °C;  $^1\text{H}$  NMR (300 MHz,  $\text{CDCl}_3$ ):  $\delta$  (ppm) 8.08 (d,  $J$  = 8.2 Hz, 1H), 8.02-7.85 (m, 3H), 7.58 (d,  $J$  = 8.8 Hz, 1H), 7.53-7.45 (m, 3H), 7.39 (d,  $J$  = 17.2 Hz, 1H), 2.51 (s, 3H);  $^{13}\text{C}$  NMR (75 MHz,  $\text{CDCl}_3$ ):  $\delta$  (ppm) 181.08, 178.41, 151.89, 141.41, 135.28, 134.72, 133.31, 132.36, 129.22, 128.13, 128.04, 125.91, 124.11, 123.29, 116.71, 115.39, 18.10; **HRMS** (ESI): calc. for  $\text{C}_{19}\text{H}_{12}\text{BrO}_3$   $[\text{M}-\text{H}]^-$ : 366.9975, found: 366.9954  $m/z$ .

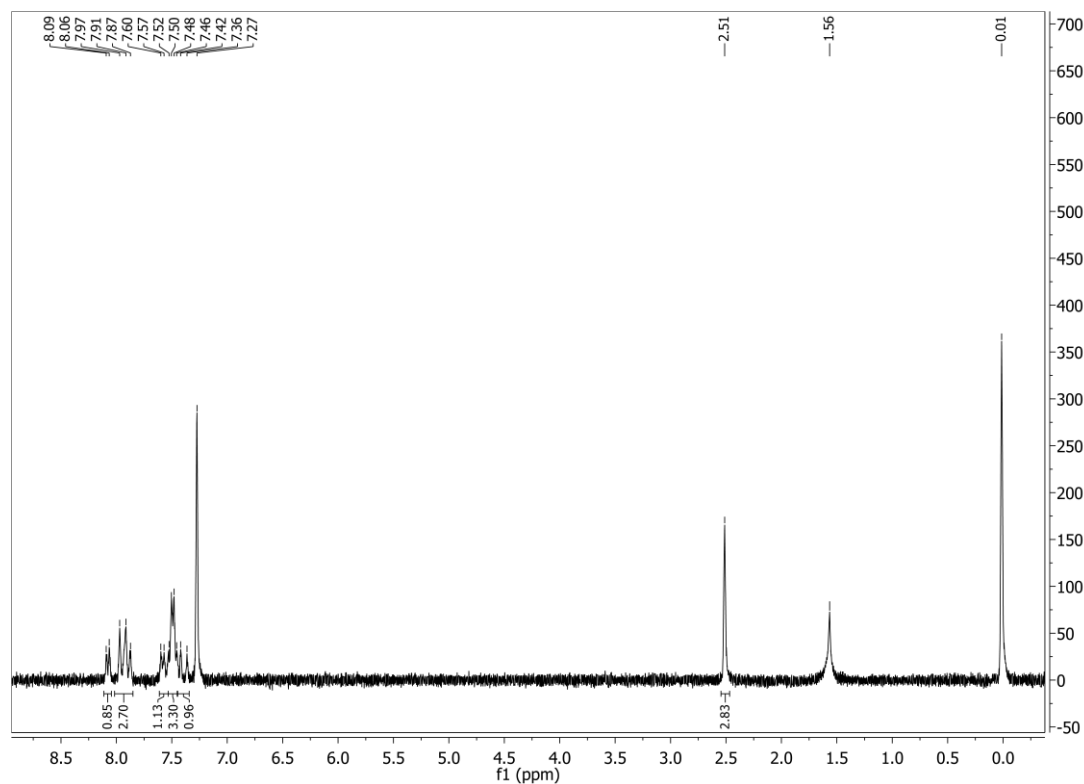Figure E47 <sup>1</sup>H-NMR spectrum of 3x in CDCl<sub>3</sub>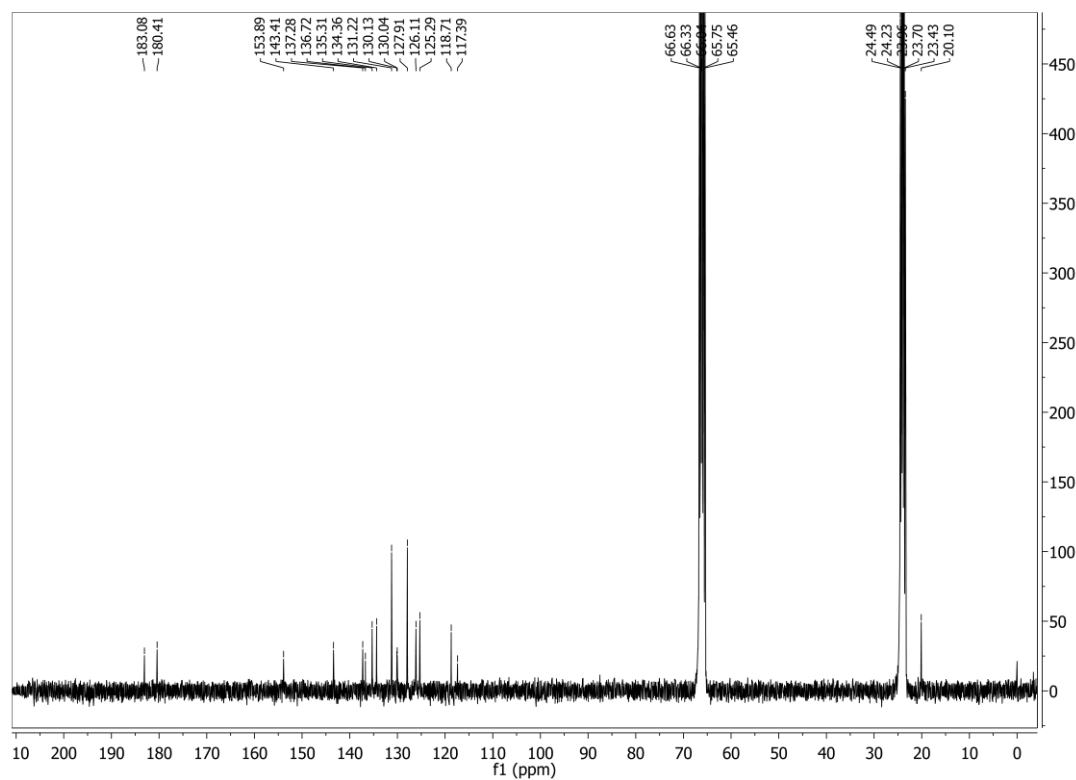Figure E48 <sup>13</sup>C-NMR spectrum of 3x in THF**2-hydroxy-5-methoxy-3-styrylnaphthalene-1,4-dione (3y)**



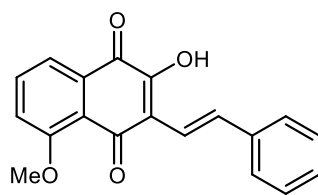**3y**

**Purification:** flash chromatography on silica gel (CH<sub>2</sub>Cl<sub>2</sub>/MeOH : 500/1)

**Yield:** 83% (76.2 mg)

**Physical appearance:** red solid

**M.p.** 156.2-157.3 °C; **<sup>1</sup>H NMR** (300 MHz, DMSO-*d*<sub>6</sub>): δ (ppm) 7.81 (d, *J* = 16.4 Hz, 1H), 7.76 – 7.68 (m, 1H), 7.62 (d, *J* = 6.8 Hz, 1H), 7.53 (d, *J* = 7.5 Hz, 3H), 7.40 (d, *J* = 7.1 Hz, 2H), 7.35 (d, *J* = 5.5 Hz, 1H), 7.30 (d, *J* = 6.0 Hz, 1H), 3.90 (s, 3H); **<sup>13</sup>C NMR** (75 MHz, CDCl<sub>3</sub>): δ (ppm) 183.44, 180.78, 159.35, 153.67, 137.76, 135.99, 133.77, 130.94, 128.18, 127.93, 127.34, 126.65, 119.54, 119.02, 117.43, 114.66, 56.09; **HRMS** (ESI<sup>-</sup>): calc. for C<sub>19</sub>H<sub>13</sub>O<sub>4</sub> [M-H]<sup>-</sup>: 305.0819, found: 305.0800 *m/z*.

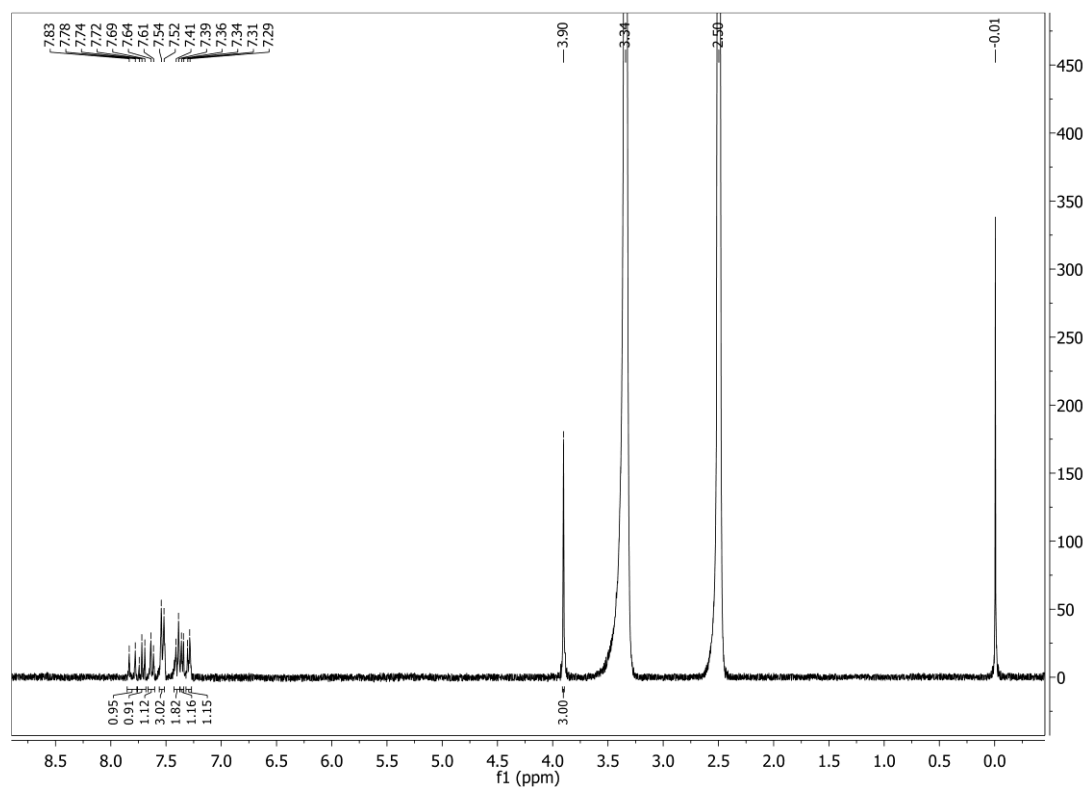

Figure E49 <sup>1</sup>H-NMR spectrum of **3y** in CDCl<sub>3</sub>

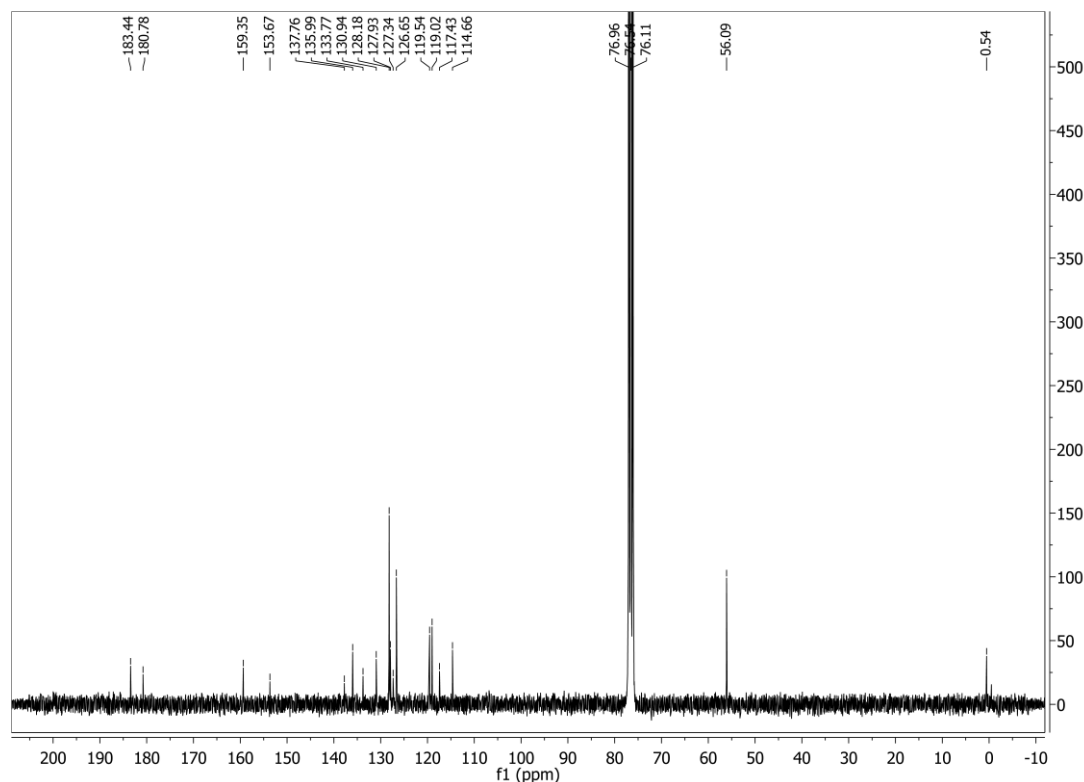Figure E50  $^{13}\text{C}$ -NMR spectrum of **3y** in  $\text{CDCl}_3$ **3-hydroxy-6-methoxy-2-styrylnaphthalene-1,4-dione (3z)**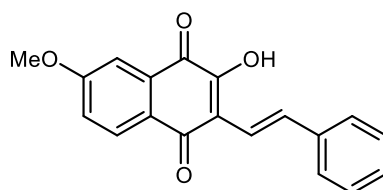**3z**

**Purification:** flash chromatography on silica gel ( $\text{CH}_2\text{Cl}_2/\text{MeOH}$  : 500/1)

**Yield:** 86% (78.8 mg)

**Physical appearance:** red solid

**M.p.** 141.3-143.9 °C;  $^1\text{H NMR}$  (300 MHz,  $\text{CDCl}_3$ ):  $\delta$  (ppm) 8.11 (d,  $J$  = 8.6 Hz, 1H), 7.94 (t,  $J$  = 14.8 Hz, 2H), 7.61 (d,  $J$  = 7.5 Hz, 2H), 7.53 (d,  $J$  = 2.6 Hz, 1H), 7.43 (d,  $J$  = 6.9 Hz, 1H), 7.38 (d,  $J$  = 7.5 Hz, 1H), 7.32 (d,  $J$  = 7.0 Hz, 1H), 7.23 (dd,  $J$  = 8.7, 2.6 Hz, 1H), 3.95 (s, 3H);  $^{13}\text{C NMR}$  (75 MHz,  $\text{CDCl}_3$ ):  $\delta$  (ppm) 183.56, 181.16, 163.56, 151.52, 139.28, 137.87, 131.35, 129.49, 128.71, 128.63, 127.18, 125.99, 120.96, 118.44, 117.60, 109.70, 55.95; **HRMS** (ESI): calc. for  $\text{C}_{19}\text{H}_{13}\text{O}_4$   $[\text{M}-\text{H}]^-$ : 305.0819, found: 305.0815  $m/z$ .

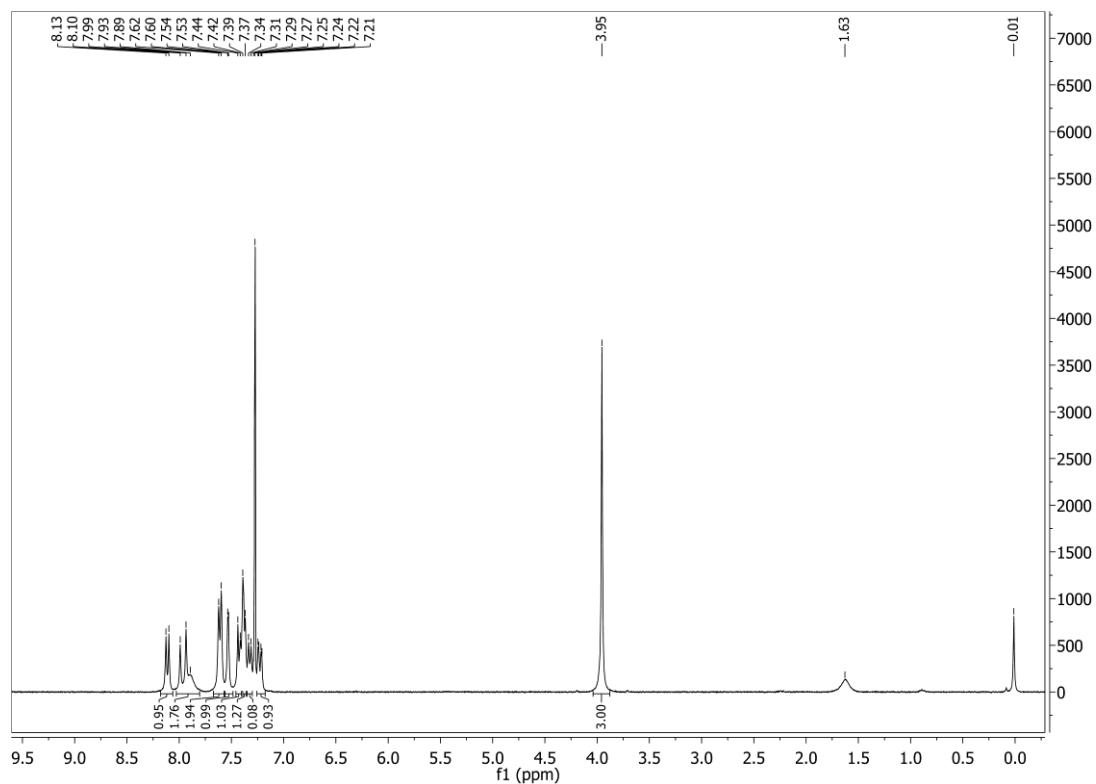Figure E51  $^1\text{H}$ -NMR spectrum of **3z** in  $\text{CDCl}_3$ 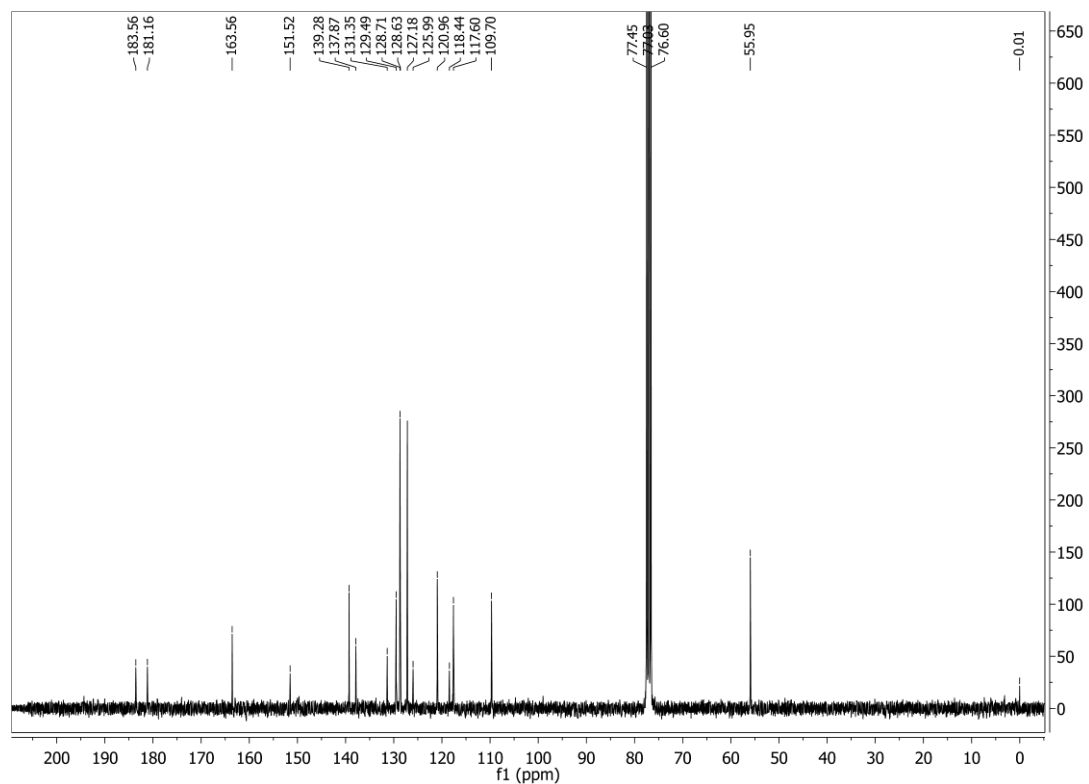Figure E52  $^{13}\text{C}$ -NMR spectrum of **3z** in  $\text{CDCl}_3$ 

**3-hydroxy-6-methoxy-2-(4-methylstyryl)naphthalene-1,4-dione (3aa)**

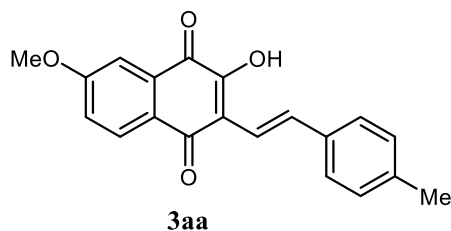

**Purification:** flash chromatography on silica gel (CH<sub>2</sub>Cl<sub>2</sub>/MeOH : 500/1)

**Yield:** 89% (85.5 mg)

**Physical appearance:** red solid

**M.p.** 133.5-136.3 °C; **<sup>1</sup>H NMR** (300 MHz, CDCl<sub>3</sub>): δ (ppm) 8.12 (d, *J* = 11.0 Hz, 1H), 7.96 (d, *J* = 14.9 Hz, 1H), 7.63-7.44 (m, 3H), 7.38 (d, *J* = 15.8 Hz, 1H), 7.21 (d, *J* = 7.2 Hz, 3H), 3.97 (s, 3H), 2.38 (s, 3H); **<sup>13</sup>C NMR** (75 MHz, CDCl<sub>3</sub>): δ (ppm) 183.16, 180.61, 163.04, 150.82, 138.87, 138.31, 134.66, 133.82, 130.91, 128.96, 126.64, 125.51, 120.37, 118.23, 116.14, 109.18, 55.45, 20.89; **HRMS** (ESI): calc. for C<sub>20</sub>H<sub>15</sub>O<sub>4</sub> [M-H]<sup>-</sup>: 319.0976, found: 319.0958 *m/z*.

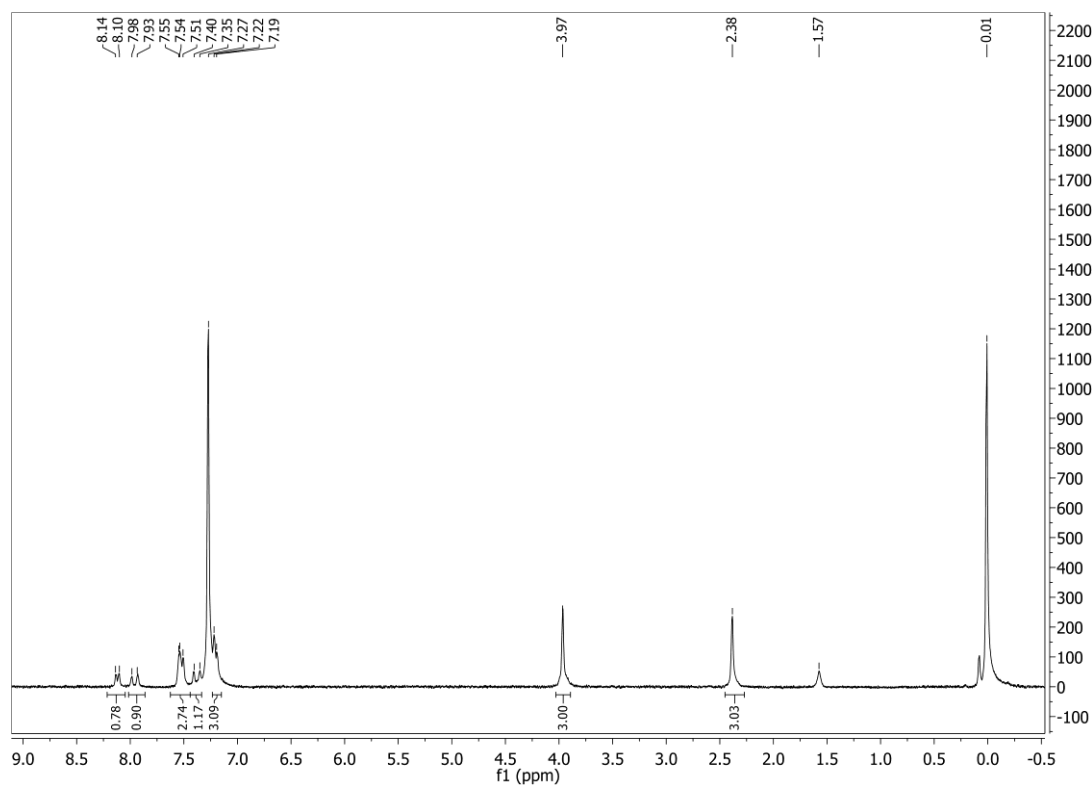

Figure E53 <sup>1</sup>H-NMR spectrum of **3aa** in CDCl<sub>3</sub>

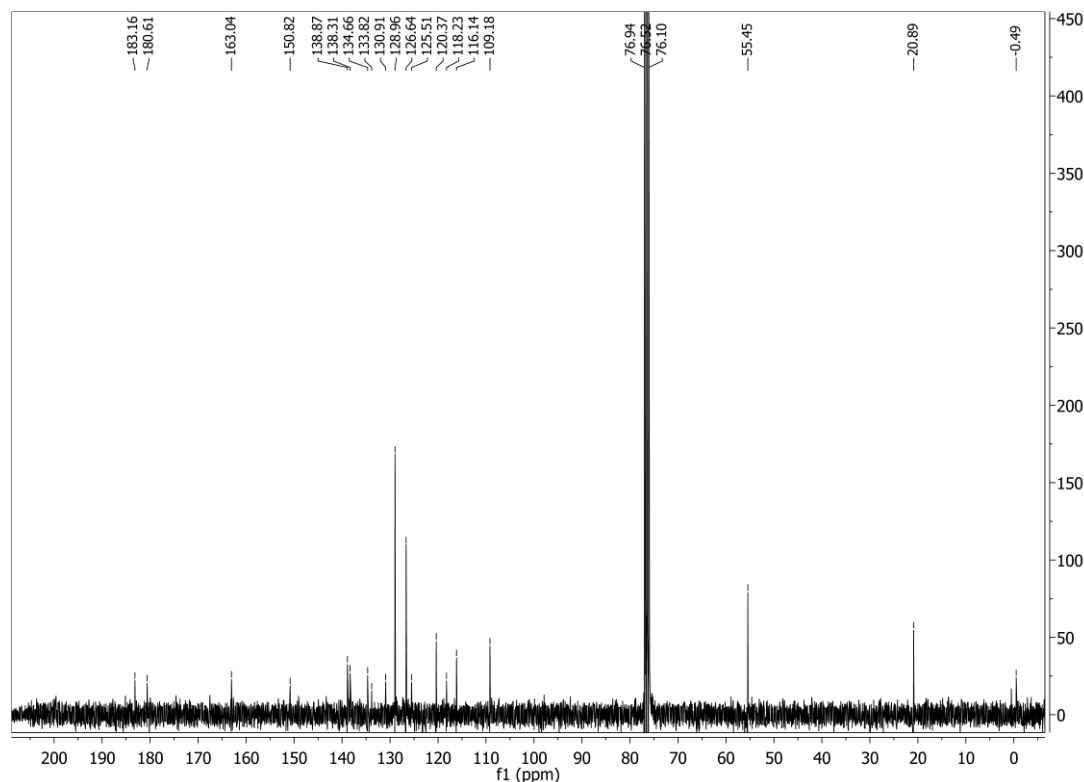Figure E54  $^{13}\text{C}$ -NMR spectrum of **3aa** in  $\text{CDCl}_3$ **2-hydroxy-6,7-dimethoxy-3-styrylnaphthalene-1,4-dione (3ab)**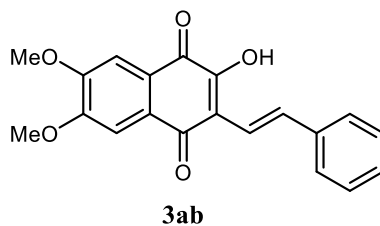

**Purification:** flash chromatography on silica gel ( $\text{CH}_2\text{Cl}_2/\text{MeOH}$  : 500/1)

**Yield:** 89% (89.7 mg)

**Physical appearance:** red solid

**M.p.** 156.2-158.3  $^{\circ}\text{C}$ ;  $^1\text{H}$  NMR (300 MHz,  $\text{CDCl}_3$ ):  $\delta$  (ppm) 7.93 (d,  $J$  = 16.7 Hz, 1H), 7.59 (s, 2H), 7.51 (s, 1H), 7.40 (d,  $J$  = 3.7 Hz, 2H), 7.36 (d,  $J$  = 5.4 Hz, 2H), 7.32 (d,  $J$  = 7.1 Hz, 2H), 4.07 (s, 3H), 4.04 (s, 3H);  $^{13}\text{C}$  NMR (75 MHz,  $\text{CDCl}_3$ ):  $\delta$  (ppm) 183.38, 179.74, 153.97, 152.31, 151.14, 137.90, 137.43, 133.82, 128.20, 127.98, 127.37, 126.58, 125.48, 117.03, 108.47, 107.03, 56.10, 56.03; **HRMS** (ESI): calc. for  $\text{C}_{20}\text{H}_{15}\text{O}_5$   $[\text{M}-\text{H}]^-$ : 335.0925, found: 335.0900  $m/z$ .

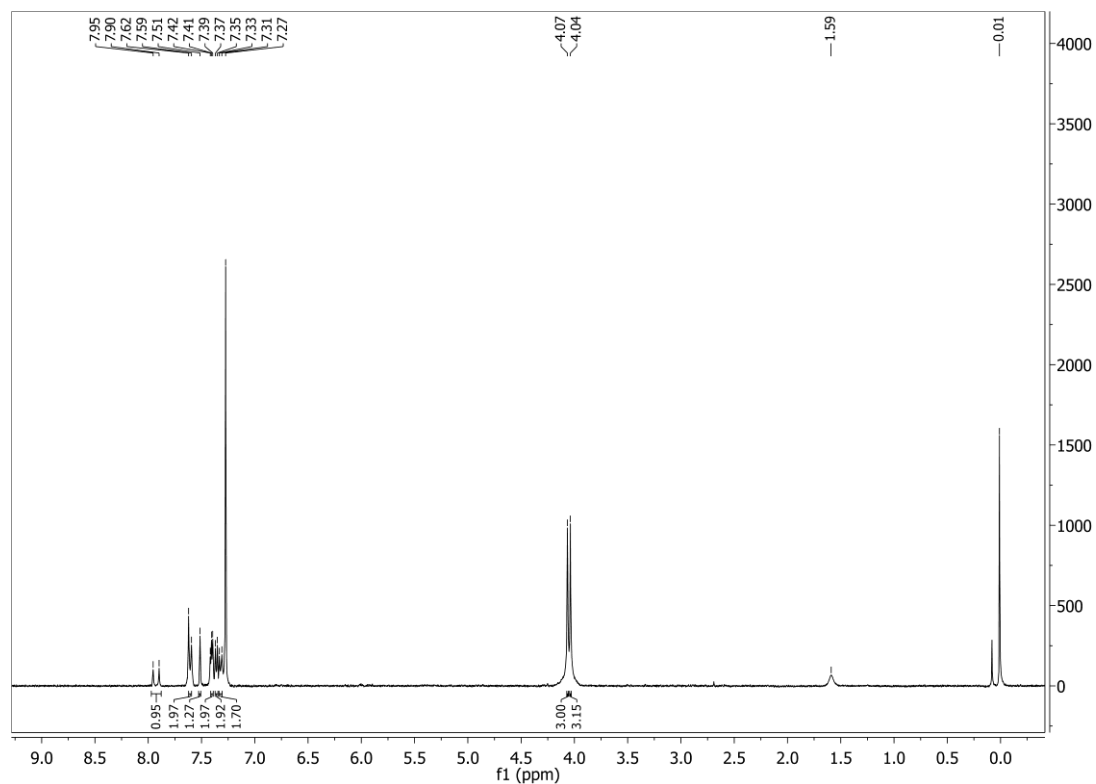Figure E55 <sup>1</sup>H-NMR spectrum of **3ab** in CDCl<sub>3</sub>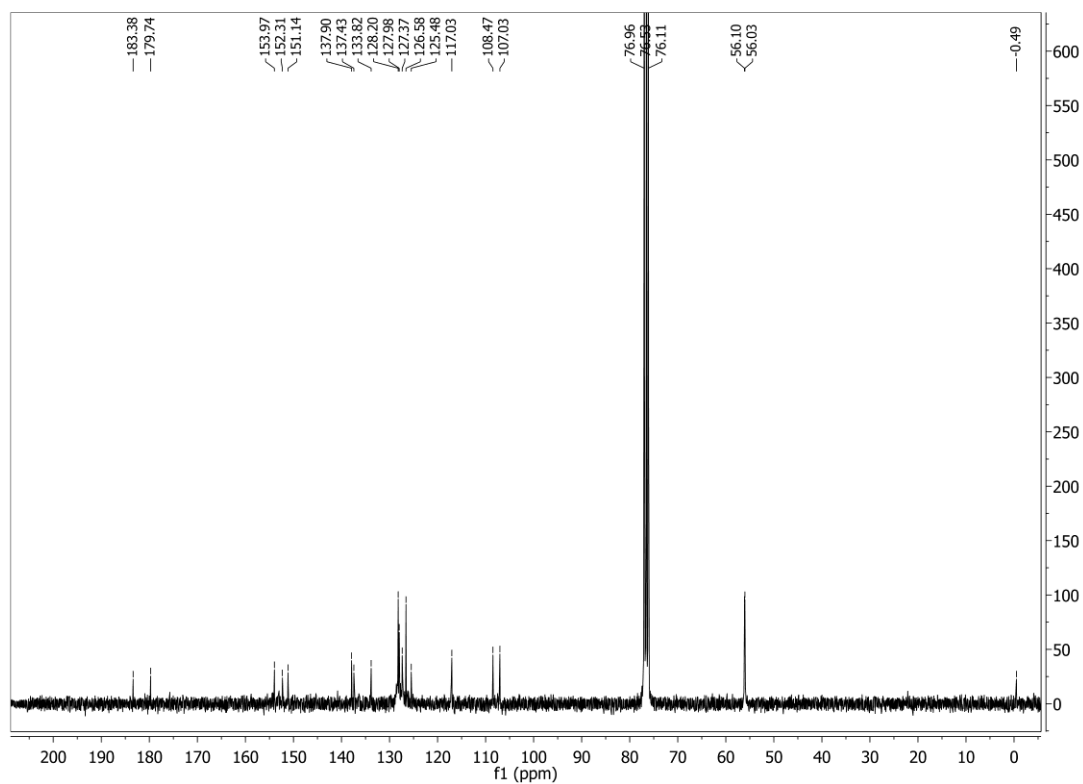Figure E56 <sup>13</sup>C-NMR spectrum of **3ab** in CDCl<sub>3</sub>**6-chloro-3-hydroxy-2-styrylnaphthalene-1,4-dione (3ac)**

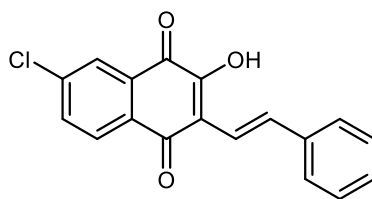**3ac**

**Purification:** flash chromatography on silica gel (CH<sub>2</sub>Cl<sub>2</sub>/MeOH : 500/1)

**Yield:** 84% (78.1 mg)

**Physical appearance:** red solid

**M.p.** 208.3-209.2 °C; **<sup>1</sup>H NMR** (300 MHz, CDCl<sub>3</sub>): δ (ppm) 8.13 (d, *J* = 8.2 Hz, 1H), 8.04 (d, *J* = 13.1 Hz, 1H), 7.93 (d, *J* = 20.8 Hz, 1H), 7.73 (d, *J* = 8.0 Hz, 1H), 7.61 (d, *J* = 6.5 Hz, 2H), 7.41 (d, *J* = 6.4 Hz, 2H), 7.39-7.28 (m, 2H); **<sup>13</sup>C NMR** (75 MHz, CDCl<sub>3</sub>): δ (ppm) 182.71, 179.58, 151.01, 139.65, 139.48, 137.16, 134.81, 134.26, 130.37, 130.25, 128.35, 128.25, 126.75, 125.44, 118.60, 116.66; **HRMS** (ESI): calc. for C<sub>18</sub>H<sub>10</sub>ClO<sub>3</sub> [M-H]<sup>-</sup>: 309.0324, found: 309.0325 *m/z*.

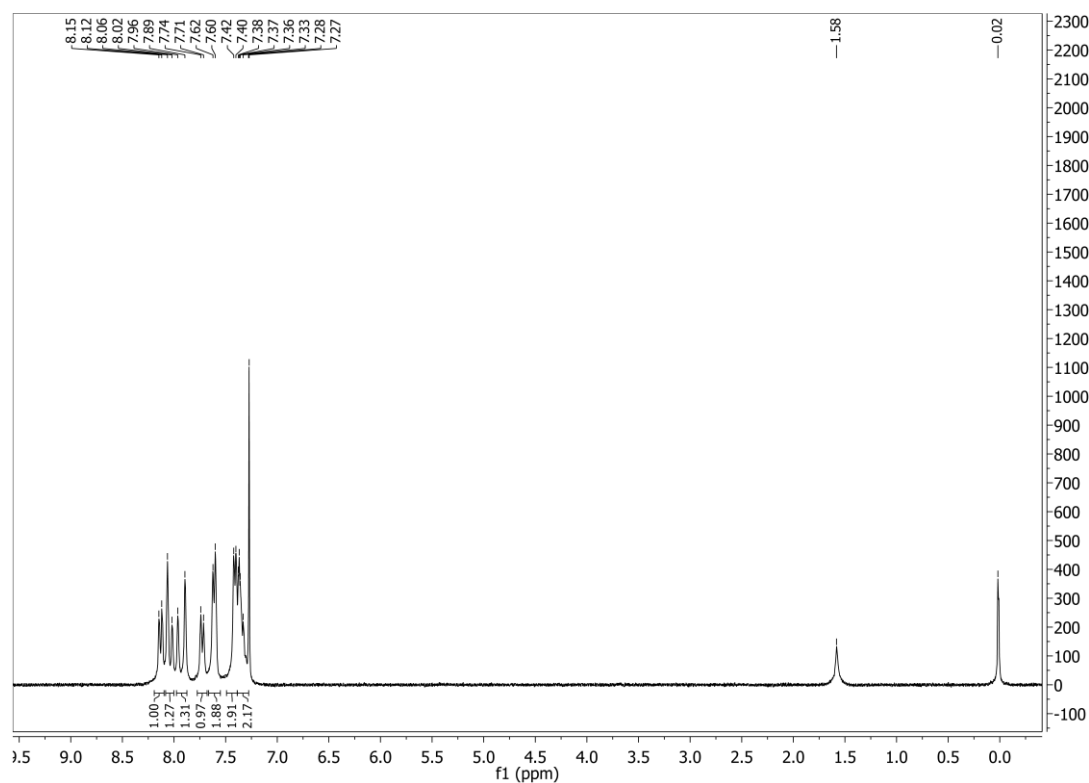

Figure E57 <sup>1</sup>H-NMR spectrum of **3ac** in CDCl<sub>3</sub>

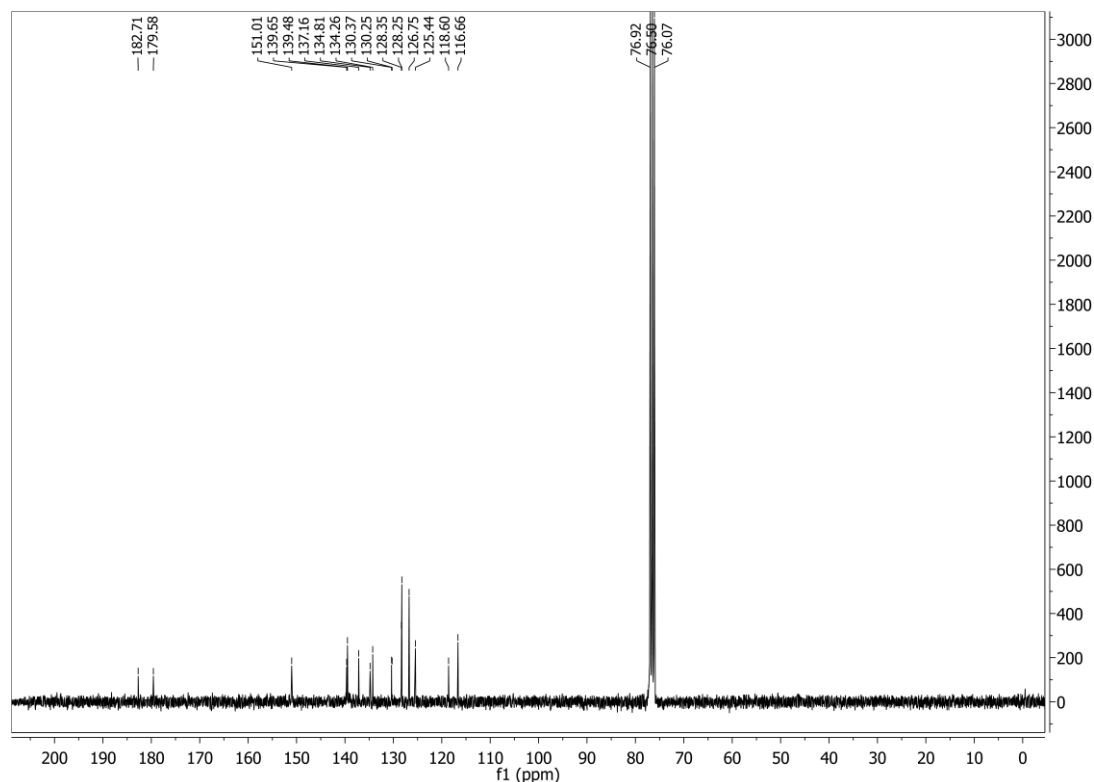Figure E58  $^{13}\text{C}$ -NMR spectrum of **3ac** in  $\text{CDCl}_3$ **6-chloro-3-hydroxy-2-(4-methylstyryl)naphthalene-1,4-dione (3ad)**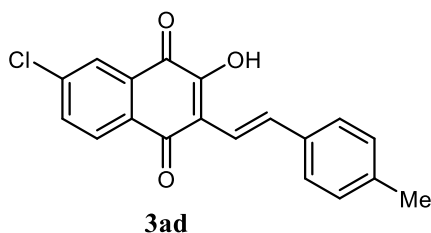**Purification:** flash chromatography on silica gel ( $\text{CH}_2\text{Cl}_2/\text{MeOH}$  : 500/1)**Yield:** 85% (82.6 mg)**Physical appearance:** red solid

**M.p.** 232.5-234.8 °C;  $^1\text{H}$  NMR (300 MHz,  $\text{CDCl}_3$ ):  $\delta$  (ppm) 8.13 (d,  $J$  = 9.6 Hz, 1H), 8.08-7.85 (m, 2H), 7.73 (d,  $J$  = 8.3 Hz, 1H), 7.52 (d,  $J$  = 8.0 Hz, 2H), 7.36 (dd,  $J$  = 16.9, 2.2 Hz, 1H), 7.21 (d,  $J$  = 6.6 Hz, 2H), 2.39 (s, 3H);  $^{13}\text{C}$  NMR (75 MHz,  $\text{CDCl}_3$ ):  $\delta$  (ppm) 182.52, 179.22, 153.52, 138.65, 137.70, 137.53, 135.29, 133.37, 131.58, 129.85, 128.75, 127.85, 126.32, 124.56, 118.51, 116.55, 19.95; **HRMS** (ESI): calc. for  $\text{C}_{19}\text{H}_{12}\text{ClO}_3$   $[\text{M}-\text{H}]^-$ : 323.0480, found: 323.0475  $m/z$ .



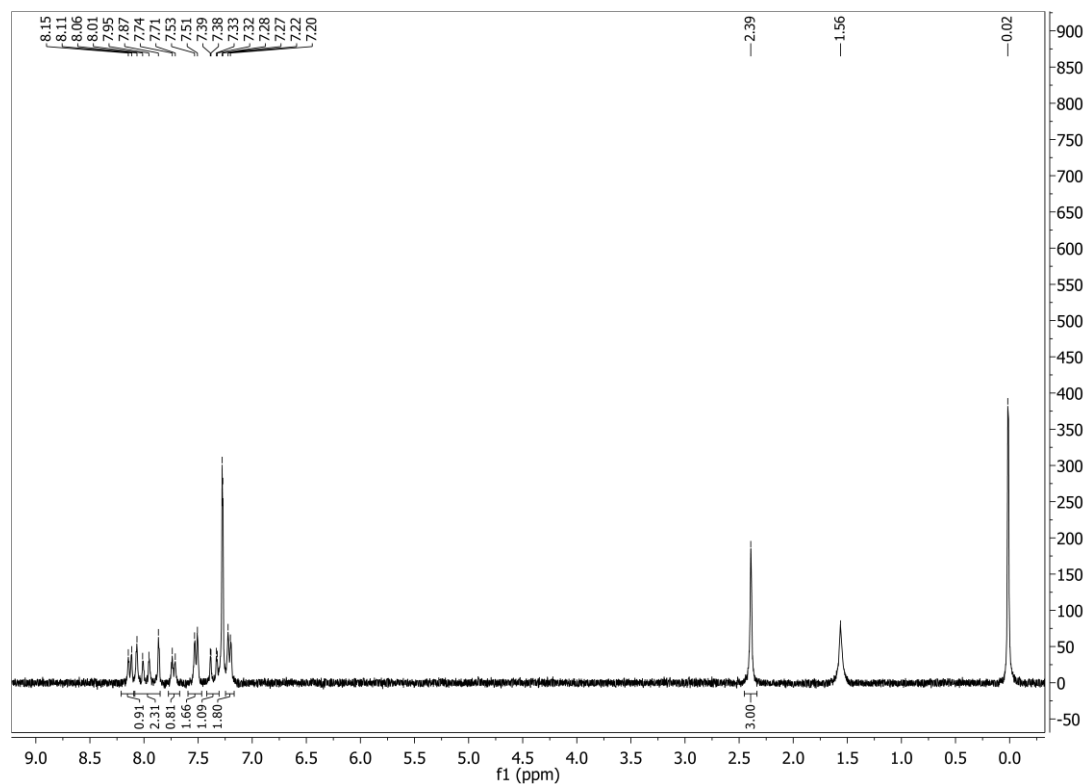Figure E59 <sup>1</sup>H-NMR spectrum of **3ad** in CDCl<sub>3</sub>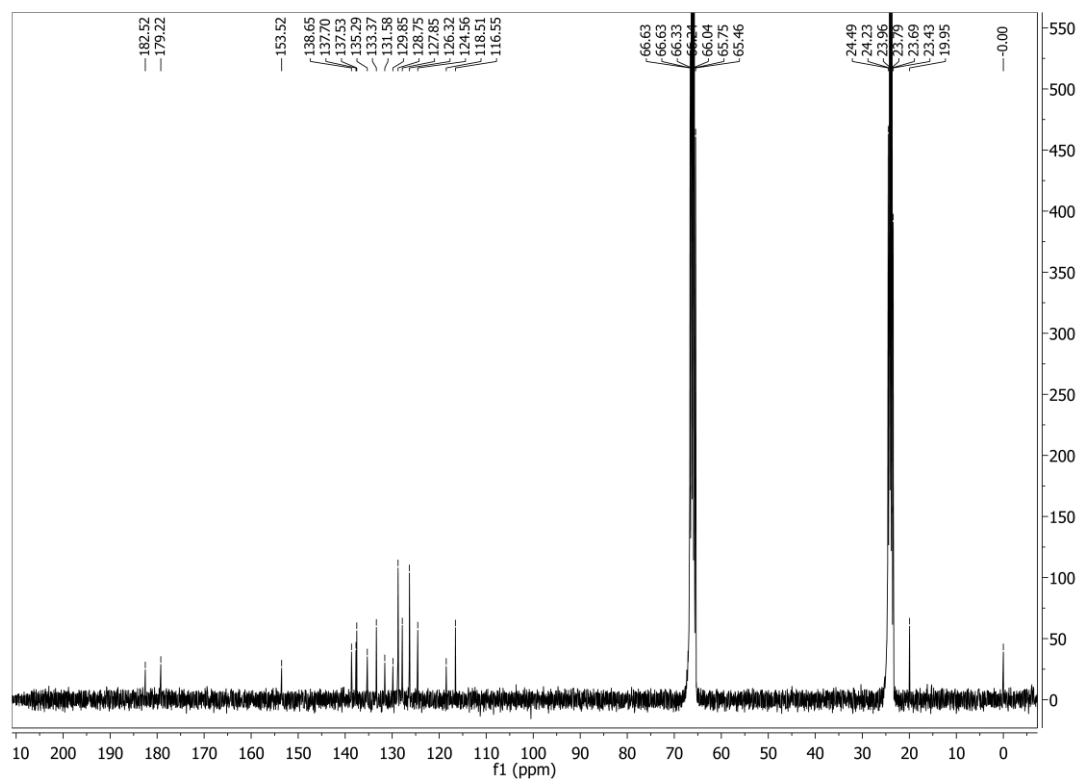Figure E60 <sup>13</sup>C-NMR spectrum of **3ad** in THF**2-(4-bromostyryl)-6-chloro-3-hydroxynaphthalene-1,4-dione (3ae)**

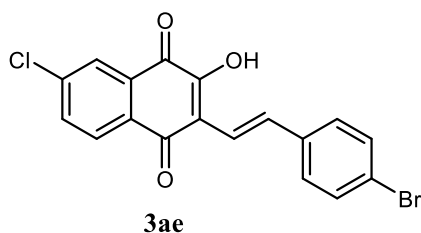

**Purification:** flash chromatography on silica gel (CH<sub>2</sub>Cl<sub>2</sub>/MeOH : 500/1)

**Yield:** 82% (95.4 mg)

**Physical appearance:** red solid

**M.p.** 238.7-239.2 °C; **<sup>1</sup>H NMR** (300 MHz, CDCl<sub>3</sub>): δ (ppm) 8.13 (d, *J* = 8.1 Hz, 1H), 8.07 (d, *J* = 1.9 Hz, 1H), 7.96-7.87 (m, 2H), 7.74 (dd, *J* = 8.4, 2.6 Hz, 1H), 7.50 (d, *J* = 8.5 Hz, 2H), 7.49 (d, *J* = 7.5 Hz, 1H), 7.37 (d, *J* = 16.5 Hz, 1H); **<sup>13</sup>C NMR** (75 MHz, CDCl<sub>3</sub>): δ (ppm) 182.35, 179.59, 151.43, 139.05, 137.98, 136.26, 134.57, 134.38, 131.43, 129.45, 128.37, 128.13, 125.51, 122.34, 117.31, 115.42; **HRMS** (ESI): calc. for C<sub>18</sub>H<sub>9</sub>BrClO<sub>3</sub> [M-H]<sup>-</sup>: 386.9429, found: 386.9425 *m/z*.

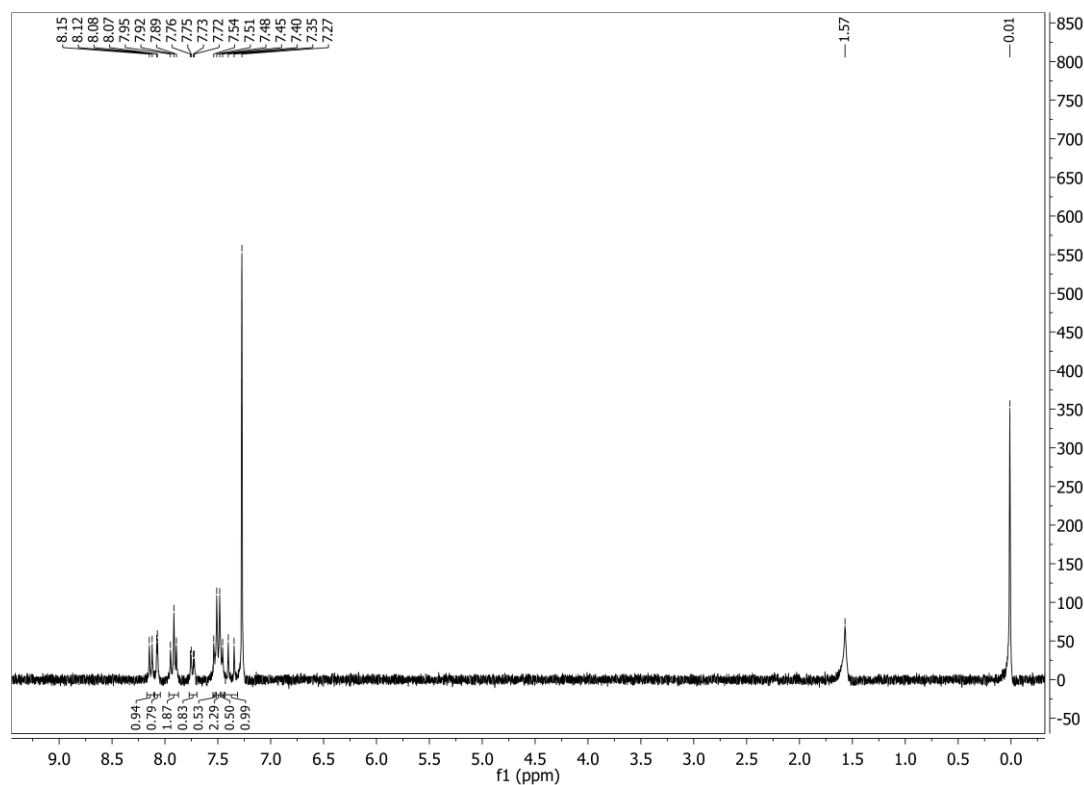

Figure E61 <sup>1</sup>H-NMR spectrum of **3ae** in CDCl<sub>3</sub>

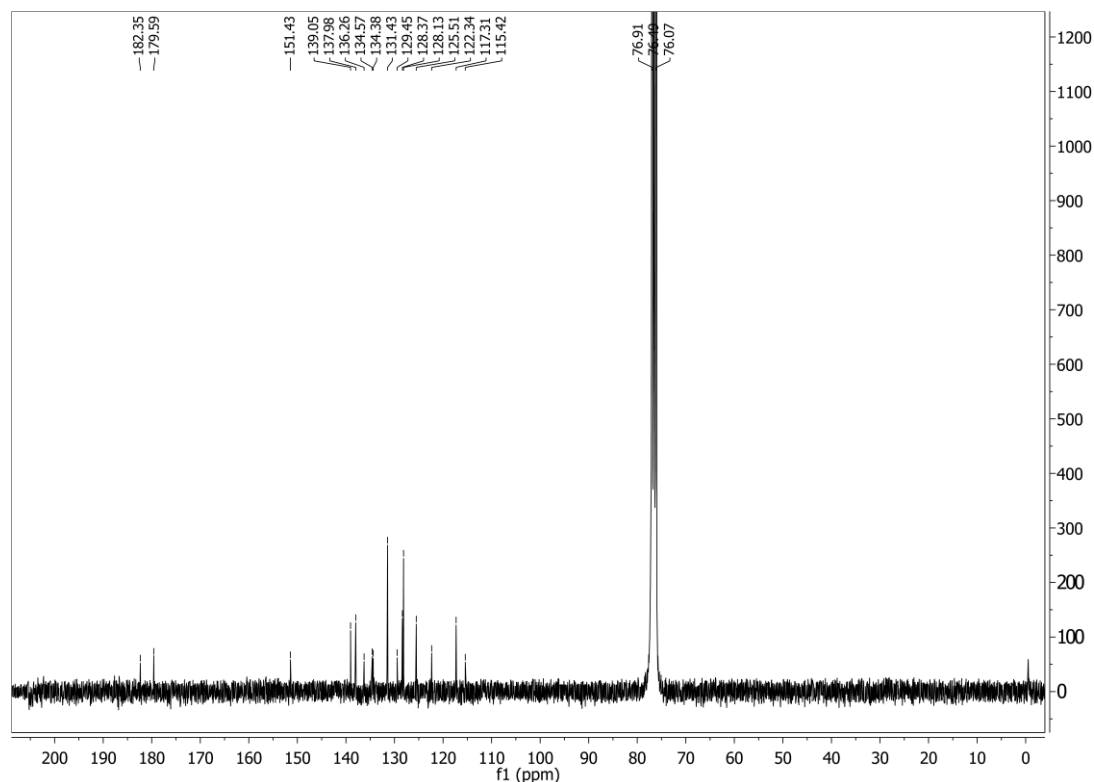Figure E62  $^{13}\text{C}$ -NMR spectrum of **3ae** in  $\text{CDCl}_3$ **6-bromo-3-hydroxy-2-styrylnaphthalene-1,4-dione (3af)**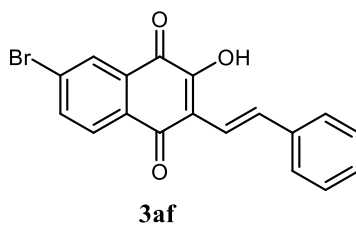

**Purification:** flash chromatography on silica gel ( $\text{CH}_2\text{Cl}_2/\text{MeOH}$  : 500/1)

**Yield:** 83% (87.9 mg)

**Physical appearance:** red solid

**M.p.** 214.9-216.1  $^\circ\text{C}$ ;  $^1\text{H}$  NMR (300 MHz,  $\text{CDCl}_3$ ):  $\delta$  (ppm) 8.23 (s, 1H), 7.94 (dd,  $J = 13.4, 2.2$  Hz, 1H), 7.89 (d,  $J = 1.5$  Hz, 1H), 7.68 (d,  $J = 121.5$  Hz, 1H), 7.61 (d,  $J = 6.2$  Hz, 2H), 7.41 (d,  $J = 5.6$  Hz, 2H), 7.38-7.31 (m, 2H);  $^{13}\text{C}$  NMR (75 MHz,  $\text{CDCl}_3$ ):  $\delta$  (ppm) 183.77, 180.53, 151.00, 134.75, 134.37, 133.69, 132.65, 132.26, 129.36, 129.13, 126.63, 126.43, 126.27, 125.50, 118.82, 117.22; **HRMS** (ESI $^-$ ): calc. for  $\text{C}_{18}\text{H}_{10}\text{BrO}_3$  [ $\text{M}-\text{H}$ ] $^-$ : 352.9819, found: 352.9813  $m/z$ .

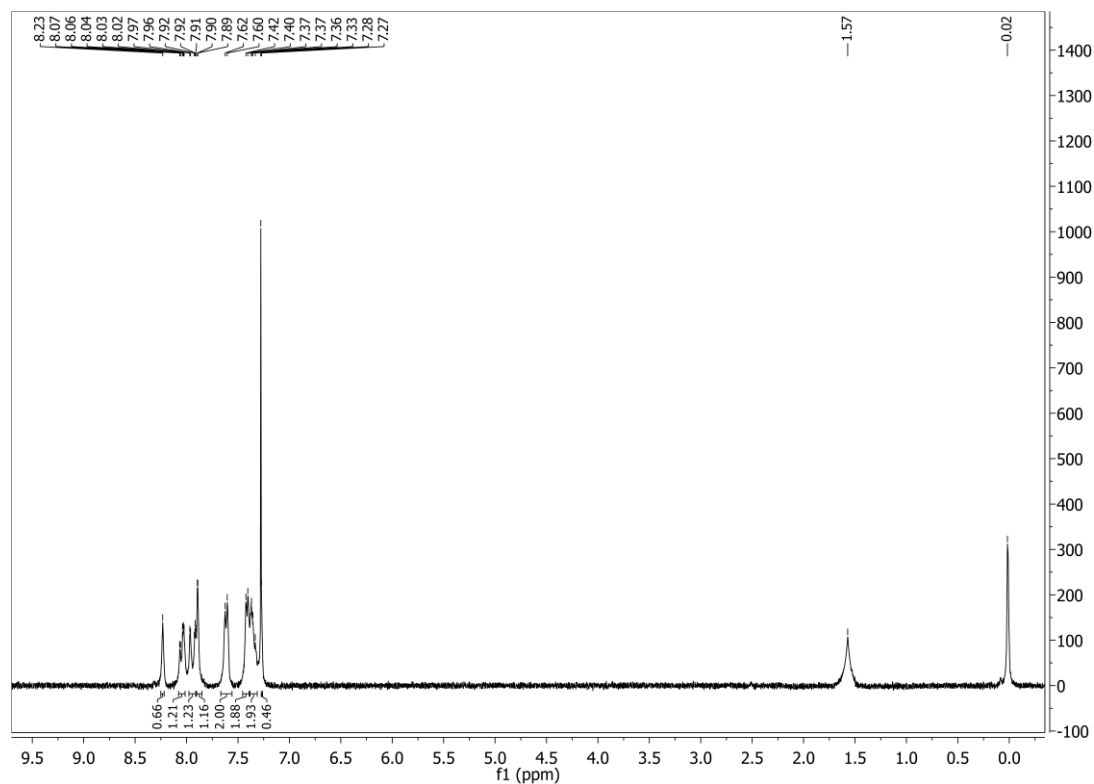Figure E63  $^1\text{H-NMR}$  spectrum of **3af** in  $\text{CDCl}_3$ 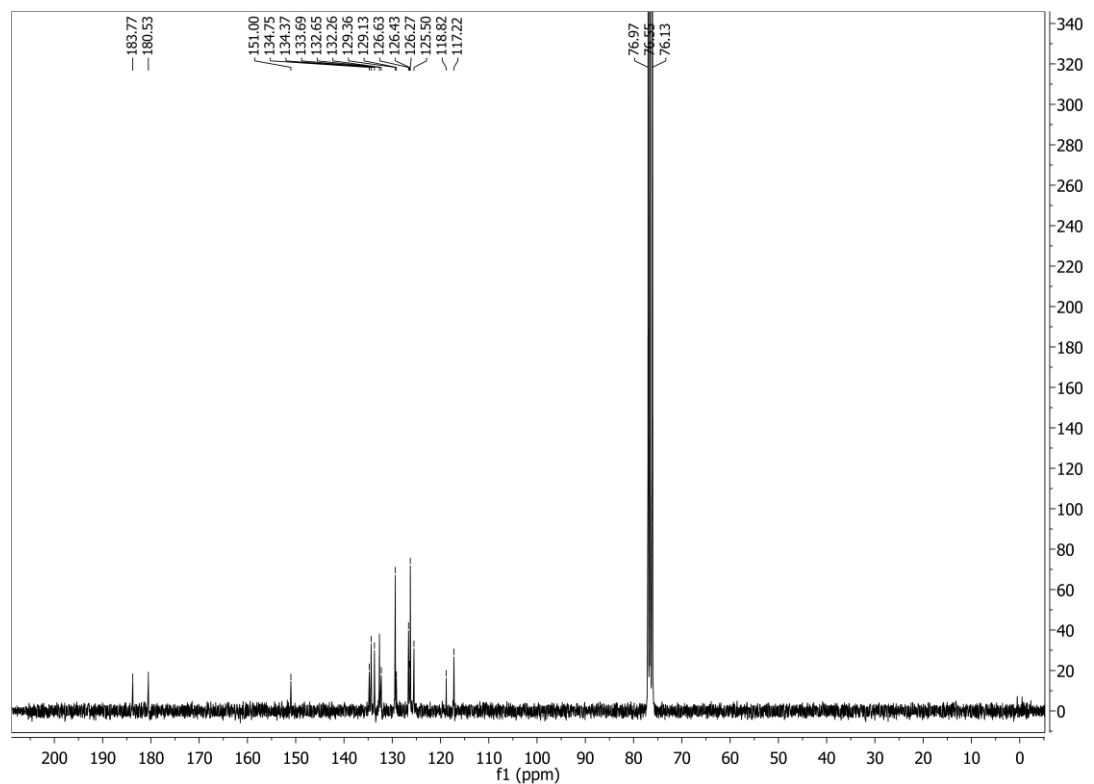Figure E64  $^{13}\text{C-NMR}$  spectrum of **3af** in  $\text{CDCl}_3$ 

## 7 Reference

[1] A. C. Baillie, R. H. Thomson, *J. Chem. Soc. Sec.* **1966**, 2184.

[2] H. -J. Nie, J. -N. Yao, Y. -W. Zhong, *J. Org. Chem.* **2011**, 76, 771-4775

[3] T. Inui, H. Matsuda, Y. takegami, *J.C.S. Chem. Comm.* **1981**, 676, 906-907.
